# Supplementary material for: Divergent total syntheses of kavaratamide A, B, and C
Source: Royal Society of Chemistry journal article supplement (doi:10.1039/d5ra07822a), 2025-01-01
Supplement: d5ra07822a1.pdf [file d5ra07822a1.pdf]

## Supporting Information

### Divergent total syntheses of kavaratamide A, B and C

Deelip Rekunge,<sup>a</sup> Bui Hoang Huu Nhan,<sup>a</sup> Yihan Wang,<sup>a</sup> Jongkook Lee<sup>\*a</sup> and Seok-Ho Kim<sup>\*a</sup>

<sup>a</sup> College of Pharmacy, Kangwon National University, Gangwondaehak-gil 1, Chuncheon, Gangwon-do 24341, Republic of Korea.

<sup>\*</sup>Corresponding authors

## Table of Contents

|                                                                           |                |
|---------------------------------------------------------------------------|----------------|
| I. General information                                                    | <b>S3</b>      |
| II. General route of synthesis                                            | <b>S4-S5</b>   |
| III. General procedures                                                   | <b>S6-S14</b>  |
| IV. NMR comparison of natural Kavaratamide A and synthetic Kavaratamide A | <b>S15-S16</b> |
| V. NMR values of synthetic Kavaratamide B & Kavaratamide C                | <b>S17-S18</b> |
| VI. Comparison of optical rotation of Kavaratamide A, B and C             | <b>S19</b>     |
| VII. The copies of $^1\text{H}$ and $^{13}\text{C}$ NMR spectra           | <b>S20-S43</b> |
| VIII. The copies of HRMS spectra                                          | <b>S44-S48</b> |
| IX. References                                                            | <b>S49-S49</b> |

## I. General information:

All the chemicals and solvents used were of LR grade purchased from Sigma Aldrich, Combi-block, and TCI and used as received.  $^1\text{H}$  NMR spectra were recorded on JNM-ECZL500R (JEOL) NMR spectrometer using tetramethylsilane (TMS) as an internal standard and  $\text{CDCl}_3/\text{DMSO}-d_6$  as a solvent. The purity determination of the starting materials and reaction monitoring was accomplished by thin-layer chromatography (TLC) on Merck silica gel GF<sub>254</sub> plates. The reaction products were purified by column chromatography using silica gel (200-300 mesh). High resolution mass spectrometry was performed using Field desorption Ionization (FDI). All the known compounds were identified by  $^1\text{H}$  NMR spectroscopy for structural identification. All chemical shifts  $\delta$  are in ppm. The chemical shift ( $\delta$  ppm) is related to the resonance of the deuterated solvent as the internal references ( $\text{CDCl}_3$   $\delta\text{H}= 7.26$  ppm,  $\delta\text{C} = 77.16$  ppm,  $\text{DMSO}-d_6$   $\delta\text{H}= 2.50$  ppm,  $\delta\text{C} = 39.60$  ppm).

## II. General route of synthesis:

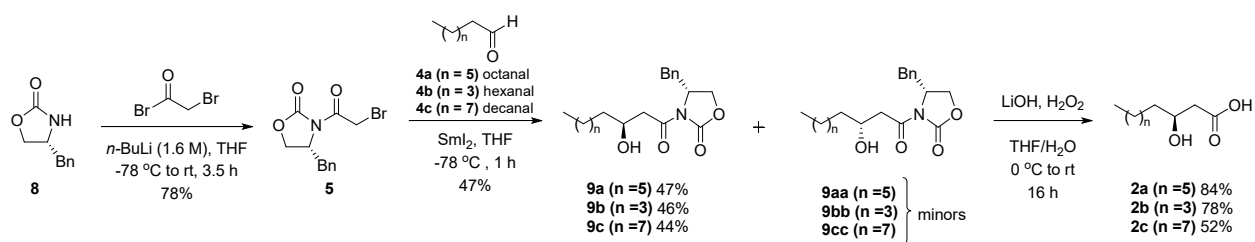

**Scheme 1.** Synthesis of  $\beta$ -hydroxy carboxylic acid

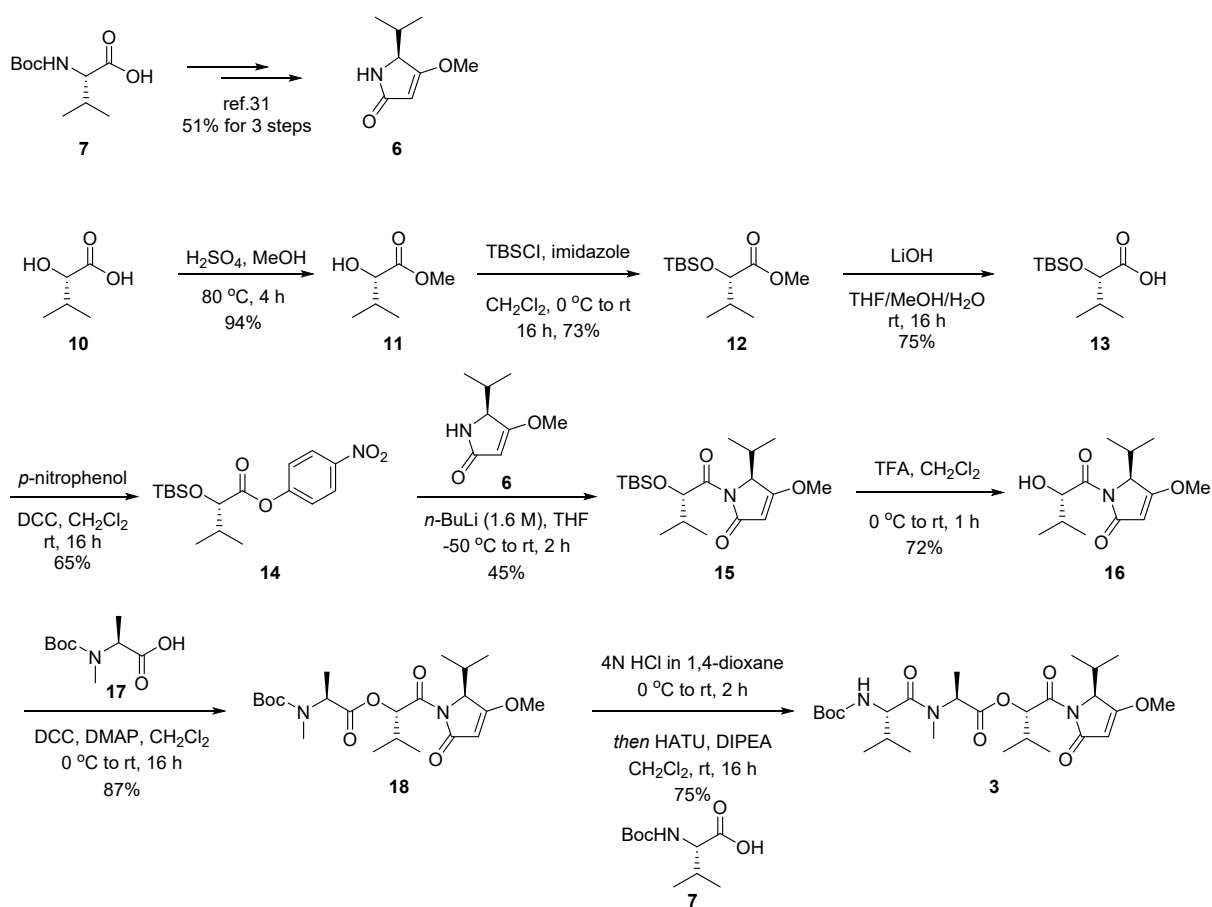

**Scheme 2.** Synthesis of key intermediate of kavaratamide A, B and C

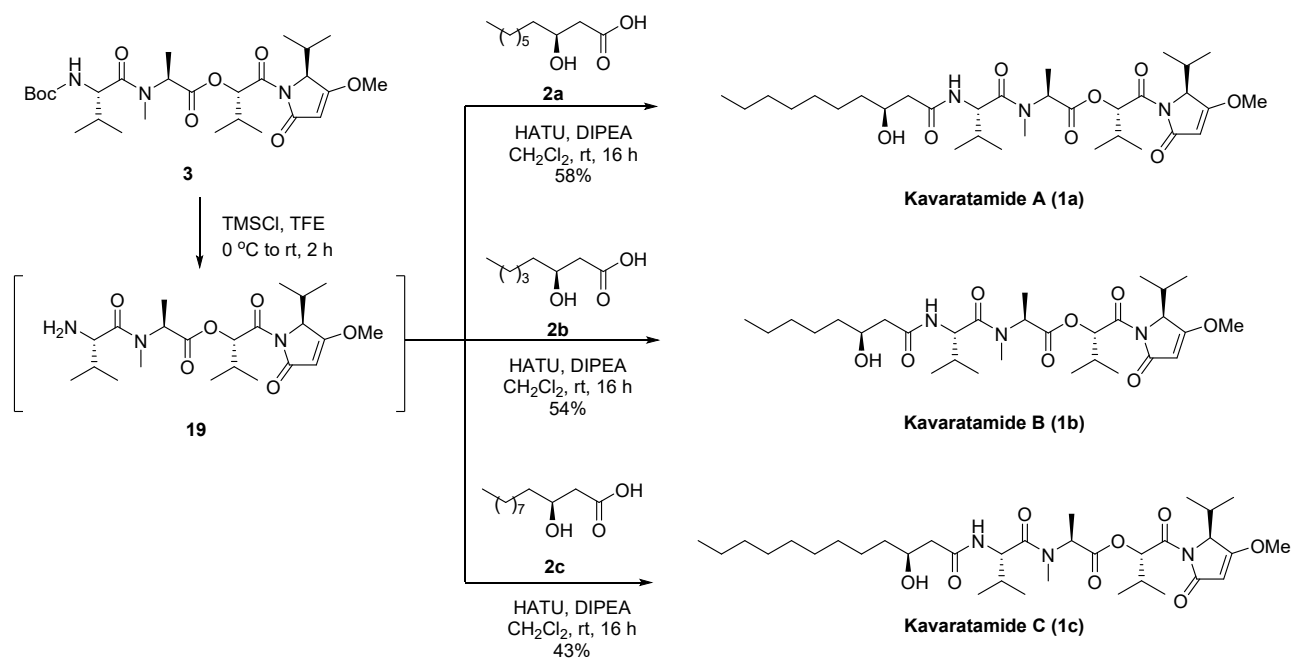

**Scheme 3.** Completion of synthesis of kavaratamide A, B and C

### III. General procedures

#### *Preparations of (R)-4-benzyl-3-(2-bromoacetyl)oxazolidine-2-one (5).*

To a solution of (*R*)-4-benzylloxazolidin-2-one (**8**) (500 mg, 2.82 mmol) in dry THF (10 mL) was added dropwise *n*-BuLi (2.11 mL, 3.39 mmol, 1.6 M solution in THF) at -78 °C in the presence of nitrogen gas. The resulting solution was stirred at -78 °C for 30 min. 2-bromoacetyl bromide (678 mg, 3.39 mmol) in THF (5 mL) was added dropwise to above solution and resulting solution was stirred at -78 °C for 30 min. After 30 min reaction mixture was warmed to rt and stirred for 2.5h at rt. After completion of the reaction, the reaction mixture was quenched with NH<sub>4</sub>Cl (aq) (3 mL), and then extracted with EtOAc (3 × 20 mL). The combined organic layers were washed with brine, dried over Na<sub>2</sub>SO<sub>4</sub>, and concentrated on rotary evaporator to give the crude. The crude was purified with column chromatography on silica gel using EtOAc–hexane (3:7) as the eluent to obtain (*R*)-4-benzyl-3-(2-bromoacetyl)oxazolidine-2-one **5** (650 mg, 77.5%) as off white solid.  $[\alpha]^{20}_D = -65.73$  ( $c = 2.19$  in Dichloromethane),  $\lambda$ : 589.3 nm; <sup>1</sup>H-NMR (500 MHz, CDCl<sub>3</sub>)  $\delta$  7.35-7.32 (m, 2H), 7.28 (t,  $J = 6.2$  Hz, 1H), 7.20 (d,  $J = 6.6$  Hz, 2H), 4.72-4.67 (m, 1H), 4.53 (dd,  $J = 17.3, 12.7$  Hz, 2H), 4.28-4.21 (m, 2H), 3.32 (dd,  $J = 13.5, 3.2$  Hz, 1H), 2.80 (dd,  $J = 13.5, 9.6$  Hz, 1H). <sup>13</sup>C-NMR (126 MHz, CDCl<sub>3</sub>)  $\delta$  166.1, 153.0, 134.8, 129.5, 129.2, 127.6, 66.8, 55.6, 37.6, 28.3.

#### *Preparations of (R)-4-benzyl-3-((S)-3-hydroxydecanoyl)oxazolidine-2-one (9a).*

To a solution of SmI<sub>2</sub> (20 mL, 2.01 mmol, 0.1 M solution in THF) in dry THF (5 mL) was added dropwise solution of (*R*)-4-benzyl-3-(2-bromoacetyl)oxazolidine-2-one (**5**) (200 mg, 0.67 mmol) and octanal (**4a**) (86 mg, 0.67 mmol) in THF (5 mL) over 5 min at -78 °C in the presence of nitrogen gas. The resulting solution was stirred at -78 °C for 1h. After completion of the reaction, the reaction mixture was quenched with 1N HCl (2 mL), and then extracted with EtOAc (3 × 20 mL). The combined organic layers were washed with aqueous Sodium thiosulfate pentahydrate, brine, dried over Na<sub>2</sub>SO<sub>4</sub>, and concentrated on rotary evaporator to give the crude. The crude was purified with column chromatography on silica gel using EtOAc–hexane (4:6) as the eluent to obtain (*R*)-4-benzyl-3-((*S*)-3-hydroxydecanoyl)oxazolidine-2-one **9a** (110 mg, 47%) as off white solid. Diastereomeric ratio (dr = 8.8:1.2, determined by isolated yield). <sup>1</sup>H-NMR (500 MHz, CDCl<sub>3</sub>)  $\delta$  7.34-7.31 (m, 2H), 7.28-7.25 (m, 1H), 7.21-7.19 (m, 2H), 4.71-4.66 (m, 1H), 4.23-4.20 (m, 1H), 4.18 (d,  $J = 2.9$  Hz, 1H), 4.15-4.10 (m, 1H), 3.30 (dd,  $J = 13.3, 3.4$  Hz, 1H), 3.17 (dd,  $J = 17.5, 2.5$  Hz, 1H), 2.97 (dd,  $J = 17.4, 9.5$  Hz, 1H), 2.81-2.75 (m, 1H), 1.62-1.46 (m, 5H), 1.38-1.24 (m, 10H), 0.87 (t,  $J = 7.0$  Hz, 3H). <sup>13</sup>C-NMR (126 MHz, CDCl<sub>3</sub>)  $\delta$  173.0, 153.5, 135.2, 129.5, 129.1, 127.5, 68.0, 66.4, 55.2, 42.8, 38.0, 36.7, 31.9, 29.6, 29.3, 25.6, 22.7, 14.2.

#### *(S)-3-hydroxydecanoic acid (2a).*

To a solution of (*R*)-4-benzyl-3-((*S*)-3-hydroxydecanoyl)oxazolidine-2-one (**9a**) (100 mg, 0.288 mmol) in THF: H<sub>2</sub>O 1:1 (10 mL) was added H<sub>2</sub>O<sub>2</sub> 30 % (w/w) in H<sub>2</sub>O (0.25 mL, 1.44 mmol) and LiOH (21 mg, 0.864 mmol) at 0 °C in the presence of nitrogen gas. The resulting solution was stirred at 0 °C to rt for 16h. After completion of the reaction, the reaction mixture was quenched with aqueous sodium thiosulfate pentahydrate (2 mL), and then extracted with EtOAc (3 × 10 mL). The combined organic layers were washed with brine, dried over Na<sub>2</sub>SO<sub>4</sub>, and

concentrated on rotary evaporator to give the crude. The crude was purified with column chromatography on silica gel using MeOH–DCM (1:9) as the eluent to obtain (*S*)-3-hydroxydecanoic acid **2a** (45 mg, 84%) as off white solid.  $[\alpha]_{\text{D}}^{25} = +32.5$  ( $c = 0.1$  in MeOH),  $^2$   $^1\text{H-NMR}$  (500 MHz,  $\text{CDCl}_3$ )  $\delta$  4.04–4.00 (m, 1H), 2.56 (dd,  $J = 16.5$ , 3.1 Hz, 1H), 2.46 (dd,  $J = 16.6$ , 8.9 Hz, 1H), 1.58–1.52 (m, 1H), 1.48–1.40 (m, 2H), 1.33–1.26 (m, 10H), 0.85 (t,  $J = 7.0$  Hz, 3H).  $^{13}\text{C-NMR}$  (126 MHz,  $\text{CDCl}_3$ )  $\delta$  177.9, 68.1, 41.1, 36.6, 31.9, 29.5, 29.3, 25.5, 22.7, 14.2. HRMS ( $\text{ES}^+$ )  $m/z$   $[\text{M-H}]^+$  calcd 187.1340.; found 187.1337.  $^2$

**(*S*)-tert-butyl 3-hydroxy-2-isopropyl-5-oxo-2,5-dihydro-1H-pyrrole-1-carboxylate (6a).**

To a solution of Meldrum's acid (2.85 g, 19.8 mmol.), DCC (4.9 g, 23.8 mmol.) and DMAP (4.84 g, 39.6 mmol.) in  $\text{CH}_2\text{Cl}_2$  (50 mL) was added Boc-*N*-L-Valine (**7**) (4.3 g, 19.8 mmol.) at rt in the presence of nitrogen gas. The resulting solution was stirred at rt for 3h. After completion of the reaction, the reaction mixture was filtered. The filtrate was diluted with  $\text{CH}_2\text{Cl}_2$ , transferred to a separatory funnel, and extracted. The combined organic layers were washed with brine, dried over  $\text{Na}_2\text{SO}_4$ , and concentrated on rotary evaporator to give the residue. The residue was then refluxed in methanol (300 mL) for 1h. The reaction mixture was concentrated on a rotary evaporator to afford the crude (*S*)-tert-butyl 3-hydroxy-2-isopropyl-5-oxo-2,5-dihydro-1H-pyrrole-1-carboxylate **6a**, which was submitted to the next step without further purification.

**(*S*)-tert-butyl 2-isopropyl-3-methoxy-5-oxo-2,5-dihydro-1H-pyrrole-1-carboxylate (6b).**

To a solution of crude (*S*)-tert-butyl 3-hydroxy-2-isopropyl-5-oxo-2,5-dihydro-1H-pyrrole-1-carboxylate (**6a**) (4.2 g, 17.4 mmol.) in dry THF (100 mL) was added TPP (5.93 g, 22.62 mmol.), and DIAD (3.8 g, 19.14 mmol.), and dry methanol (3.87 mL, 95.7 mmol.) at 0 °C in the presence of nitrogen gas. The resulting solution was stirred at 0 °C for 30 min and 3h at rt. After completion of the reaction, the reaction mixture was diluted with water (50 mL), and then extracted with EtOAc (3 × 50 mL). The combined organic layers were washed with brine, dried over  $\text{Na}_2\text{SO}_4$ , and concentrated on rotary evaporator to give the crude. The crude was purified with column chromatography on silica gel using EtOAc–hexane (4:6) as the eluent to obtain (*S*)-tert-butyl 2-isopropyl-3-methoxy-5-oxo-2,5-dihydro-1H-pyrrole-1-carboxylate **6b** (3.0 g, 60% over 2 steps) as off white solid.  $^1\text{H-NMR}$  (500 MHz,  $\text{CDCl}_3$ )  $\delta$  5.04 (s, 1H), 4.34 (d,  $J = 2.4$  Hz, 1H), 3.79 (s, 3H), 2.46–2.40 (m, 1H), 1.51 (s, 9H), 1.07 (d,  $J = 7.3$  Hz, 3H), 0.78 (d,  $J = 7.0$  Hz, 3H).  $^{13}\text{C-NMR}$  (126 MHz,  $\text{CDCl}_3$ )  $\delta$  178.0, 169.4, 149.6, 95.0, 82.5, 64.7, 58.3, 29.6, 28.2, 18.8, 15.6. HRMS ( $\text{ES}^+$ )  $m/z$   $[\text{M}+\text{Na}]^+$  calcd for  $\text{C}_{13}\text{H}_{21}\text{NO}_4\text{Na}$ , 278.1354.; found 278.1363.  $^3$

**(*S*)-5-isopropyl-4-methoxy-1H-pyrrol-2(5H)-one (6).**

To a solution of (*S*)-tert-butyl 2-isopropyl-3-methoxy-5-oxo-2,5-dihydro-1H-pyrrole-1-carboxylate (**6b**) (2.0 g, 7.84 mmol.) in dry  $\text{CH}_2\text{Cl}_2$  (30 mL) was added TFA (10 mL,) at 0 °C in the presence of nitrogen gas. The resulting solution was stirred at 0 °C for 30 min and 1h at rt. After completion of the reaction, TFA was removed under reduced pressure to give the crude. The crude was purified with column chromatography on silica gel using MeOH–DCM (0.5:9.5) as the eluent to obtain (*S*)-5-isopropyl-4-methoxy-1H-pyrrol-2(5H)-one **6** (1.0 g, 85%) as off white solid.  $[\alpha]_{\text{D}}^{25} = +8.47$  ( $c = 1.0$  in  $\text{CHCl}_3$ ),  $^3$   $^1\text{H-NMR}$  (500 MHz,  $\text{CDCl}_3$ )  $\delta$  5.78 (s, 1H), 5.02 (s, 1H), 3.97 (d,  $J = 3.1$  Hz, 1H), 3.78 (s, 3H), 2.10–2.05 (m, 1H), 1.00 (d,  $J = 7.0$  Hz, 3H), 0.79 (d,  $J = 6.7$  Hz, 3H).  $^{13}\text{C-NMR}$  (126 MHz,  $\text{CDCl}_3$ )  $\delta$  177.7, 175.0, 94.3, 62.7, 58.3, 29.4, 19.5, 15.2. HRMS ( $\text{ES}^+$ )  $m/z$   $[\text{M}+\text{H}]^+$  calcd for  $\text{C}_8\text{H}_{14}\text{NO}_2$ , 156.1019; found 156.1018.  $^3$

***(S)-methyl 2-hydroxy-3-methylbutanoate (11).***

To a solution of (*S*)-2-hydroxy-3-methylbutanoic acid (**10**) (1.0 g, 8.47 mmol,) in MeOH (10 mL) was added H<sub>2</sub>SO<sub>4</sub> (cat.) at rt. The resulting solution was stirred at 80 °C for 4h. After completion of the reaction, the reaction mixture was concentrated on rotary evaporator to give the residue. Residue was diluted with water (20 mL), and then extracted with EtOAc (3 × 20 mL). The combined organic layers were washed with aqueous sodium bicarbonate, brine, dried over Na<sub>2</sub>SO<sub>4</sub>, and concentrated on rotary evaporator to give the crude. The crude was purified with column chromatography on silica gel using EtOAc–hexane (2:8) as the eluent to obtain (*S*)-methyl 2-hydroxy-3-methylbutanoate **11** (1.05 g, 94%) as colorless liquid. [ $\alpha$ ]<sub>D</sub><sup>20</sup> = +23.7 (*c* = 1.0 in CHCl<sub>3</sub>),  $\lambda$ : 589.3 nm; <sup>4</sup> <sup>1</sup>H-NMR (500 MHz, CDCl<sub>3</sub>)  $\delta$  4.04 (d, *J* = 3.7 Hz, 1H), 3.78 (s, 3H), 2.09–2.03 (m, 1H), 1.01 (d, *J* = 7.0 Hz, 3H), 0.85 (d, *J* = 6.9 Hz, 3H). <sup>13</sup>C-NMR (126 MHz, CDCl<sub>3</sub>)  $\delta$  175.5, 75.1, 52.4, 32.2, 18.8, 16.1.

***(S)-methyl 2-((tert-butyldimethylsilyl)oxy)-3-methylbutanoate (12).***

To a solution of (*S*)-methyl 2-hydroxy-3-methylbutanoate (**11**) (1.0 g, 7.57 mmol,) in CH<sub>2</sub>Cl<sub>2</sub> (20 mL) was added imidazole (695 mg, 10.22 mmol,) and TBSCl (1.41 g, 9.46 mmol,) at 0 °C in the presence of nitrogen gas. The resulting solution was stirred at 0 °C to rt for 16h. After completion of the reaction, the reaction mixture was diluted with water (20 mL), and then extracted with CH<sub>2</sub>Cl<sub>2</sub> (3 × 20 mL). The combined organic layers were washed with aqueous sodium bicarbonate, brine, dried over Na<sub>2</sub>SO<sub>4</sub>, and concentrated on rotary evaporator to give the crude. The crude was purified with column chromatography on silica gel using EtOAc–hexane (1:9) as the eluent to obtain (*S*)-methyl 2-((tert-butyldimethylsilyl)oxy)-3-methylbutanoate **12** (1.35 g, 72.5%) as colorless liquid. [ $\alpha$ ]<sub>D</sub><sup>20</sup> = -31.3 (*c* = 2.0 in CCl<sub>4</sub>),  $\lambda$ : 589.3 nm; <sup>5</sup> <sup>1</sup>H-NMR (500 MHz, CDCl<sub>3</sub>)  $\delta$  3.95 (d, *J* = 4.9 Hz, 1H), 3.70 (s, 3H), 2.04–1.98 (m, 1H), 0.92 (d, *J* = 6.9 Hz, 3H), 0.90–0.87 (m, 12H), 0.04 (s, 3H), 0.02 (s, 3H). <sup>13</sup>C-NMR (126 MHz, CDCl<sub>3</sub>)  $\delta$  174.0, 51.5, 32.9, 25.8, 19.0, 18.4, 17.1, -5.0, -5.3.

***(S)-2-((tert-butyldimethylsilyl)oxy)-3-methylbutanoic acid (13).***

To a solution of (*S*)-methyl 2-((tert-butyldimethylsilyl)oxy)-3-methylbutanoate (**12**) (1.3 g, 5.28 mmol,) in THF: MeOH:H<sub>2</sub>O 2:1:2 (15 mL) solvent mixture was added LiOH (380 mg, 15.85 mmol) at rt in the presence of nitrogen gas. The resulting solution was stirred at rt for 16h. After completion of the reaction, the reaction mixture was concentrated on rotary evaporator to give the residue. Residue was diluted with water (20 mL), acidified with 1N HCl, and extracted with EtOAc (3 × 20 mL). The combined organic layers were washed with brine, dried over Na<sub>2</sub>SO<sub>4</sub>, and concentrated on rotary evaporator to give the crude. The crude was purified with column chromatography on silica gel using MeOH–DCM (1:9) as the eluent to obtain (*S*)-2-((tert-butyldimethylsilyl)oxy)-3-methylbutanoic acid **13** (919 mg, 75%) as off white solid. [ $\alpha$ ]<sub>D</sub><sup>22</sup> = -18.9 (*c* = 1.0 in MeOH), <sup>6</sup> <sup>1</sup>H-NMR (500 MHz, CDCl<sub>3</sub>)  $\delta$  4.07 (d, *J* = 3.7 Hz, 1H), 2.11–2.04 (m, 1H), 0.97 (d, *J* = 7.0 Hz, 3H), 0.96–0.88 (m, 12H), 0.10 (d, *J* = 5.0 Hz, 6H). <sup>13</sup>C-NMR (126 MHz, CDCl<sub>3</sub>)  $\delta$  53.5, 33.0, 25.7, 18.7, 18.2, 16.8, -5.0, -5.1.

***(S)-4-nitrophenyl 2-((tert-butyldimethylsilyl)oxy)-3-methylbutanoate (14).***

To a solution of (*S*)-2-((tert-butyldimethylsilyl)oxy)-3-methylbutanoic acid (**13**) (900 mg, 3.88 mmol,) in CH<sub>2</sub>Cl<sub>2</sub> (20 mL) was added 4-nitrophenol (647 mg, 4.65 mmol,) and DCC (959 mg, 4.65 mmol,) at rt in the presence of nitrogen gas. The resulting solution was stirred at rt for 16h. After completion of the reaction, the reaction mixture



was diluted with water (20 mL), and then extracted with CH<sub>2</sub>Cl<sub>2</sub> (3 × 30 mL). The combined organic layers were washed with brine, dried over Na<sub>2</sub>SO<sub>4</sub>, and concentrated on rotary evaporator to give the crude. The crude was purified with column chromatography on silica gel using EtOAc–hexane (1:9) as the eluent to obtain (*S*)-4-nitrophenyl 2-((*tert*-butyldimethylsilyl)oxy)-3-methylbutanoate **14** (890 mg, 65%) as colorless liquid. <sup>1</sup>H-NMR (500 MHz, CDCl<sub>3</sub>) δ 8.27 (d, *J* = 9.2 Hz, 2H), 7.25 (d, *J* = 9.2 Hz, 2H), 4.23 (d, *J* = 4.6 Hz, 1H), 2.26-2.19 (m, 1H), 1.05 (d, *J* = 6.9 Hz, 3H), 1.01 (d, *J* = 6.7 Hz, 3H), 0.94 (s, 9H), 0.11 (d, *J* = 4.4 Hz, 6H). <sup>13</sup>C-NMR (126 MHz, CDCl<sub>3</sub>) δ 171.3, 155.4, 145.5, 125.4, 122.3, 33.1, 25.8, 19.1, 18.4, 16.9, -4.8, -5.2.

**(*S*)-1-((*S*)-2-((*tert*-butyldimethylsilyl)oxy)-3-methylbutanoyl)-5-isopropyl-4-methoxy-1*H*-pyrrol-2(5*H*)-one (15).**

To a solution of (*S*)-5-isopropyl-4-methoxy-1*H*-pyrrol-2(5*H*)-one (**6**) (373 mg, 2.40 mmol) in dry THF (10 mL) was added dropwise *n*-BuLi (1.65 mL, 2.64 mmol, 1.6 M solution in THF) at -50 °C in the presence of nitrogen gas. The resulting solution was stirred at -50 °C for 10 min and added (*S*)-4-nitrophenyl 2-((*tert*-butyldimethylsilyl)oxy)-3-methylbutanoate (**14**) (850 mg, 2.40 mmol) in THF (5 mL) dropwise to above solution and resulting solution was stirred at -50 °C to rt for 2h. After completion of the reaction, the reaction mixture was quenched with NH<sub>4</sub>Cl (aq) (3 mL), and then extracted with EtOAc (3 × 20 mL). The combined organic layers were washed with brine, dried over Na<sub>2</sub>SO<sub>4</sub>, and concentrated on rotary evaporator to give the crude. The crude was purified with column chromatography on silica gel using EtOAc–hexane (2:8) as the eluent to obtain (*S*)-1-((*S*)-2-((*tert*-butyldimethylsilyl)oxy)-3-methylbutanoyl)-5-isopropyl-4-methoxy-1*H*-pyrrol-2(5*H*)-one **15** (400 mg, 45%) as off white solid. [α]<sub>D</sub><sup>22</sup> = +44.9 (*c* = 1.0 in MeOH), <sup>7</sup> <sup>1</sup>H-NMR (500 MHz, CDCl<sub>3</sub>) δ 5.26 (d, *J* = 3.8 Hz, 0.67H), 5.25 (d, *J* = 2.8 Hz, 0.3H), 5.03 (s, 0.65H), 5.03 (s, 0.3H), 4.65 (d, *J* = 2.8 Hz, 0.3H), 4.50 (d, *J* = 2.6 Hz, 0.68H), 3.83 (s, 1H), 3.82 (s, 2H), 2.69-2.64 (m, 0.63H), 2.48-2.42 (m, 0.23H), 2.12-2.07 (m, 0.26H), 1.99-1.93 (m, 0.62H), 1.11 (t, *J* = 7.5 Hz, 3H), 1.04 (d, *J* = 6.9 Hz, 1H), 0.96 (d, *J* = 6.9 Hz, 2H), 0.91 (d, *J* = 3.5 Hz, 9H), 0.85 (d, *J* = 6.9 Hz, 2H), 0.81 (d, *J* = 6.9 Hz, 1H), 0.71 (dd, *J* = 6.9, 4.9 Hz, 3H), 0.02 (d, *J* = 8.4 Hz, 7H). <sup>13</sup>C-NMR (126 MHz, CDCl<sub>3</sub>) δ 179.8, 173.4, 170.5, 94.9, 75.9, 64.3, 58.5, 31.9, 28.6, 25.9, 19.7, 19.0, 18.4, 16.0, 15.1, -4.7, -5.1. HRMS (ES<sup>+</sup>) *m/z* [M+H]<sup>+</sup> calcd for C<sub>19</sub>H<sub>35</sub>NO<sub>4</sub>Si, 370.2401; found 370.2408. <sup>7</sup>

**(*S*)-1-((*S*)-2-hydroxy-3-methylbutanoyl)-5-isopropyl-4-methoxy-1*H*-pyrrol-2(5*H*)-one (16).**

To a solution of (*S*)-1-((*S*)-2-((*tert*-butyldimethylsilyl)oxy)-3-methylbutanoyl)-5-isopropyl-4-methoxy-1*H*-pyrrol-2(5*H*)-one (**15**) (400 mg, 1.08 mmol) in dry CH<sub>2</sub>Cl<sub>2</sub> (10 mL) was added TFA (2 mL) at 0 °C in the presence of nitrogen gas. The resulting solution was stirred at 0 °C to rt for 1h. After completion of the reaction, TFA was removed under reduced pressure to give the crude. The crude was purified with column chromatography on silica gel using EtOAc–hexane (3:7) as the eluent to obtain (*S*)-1-((*S*)-2-hydroxy-3-methylbutanoyl)-5-isopropyl-4-methoxy-1*H*-pyrrol-2(5*H*)-one **16** (200 mg, 72%) as off white solid. [α]<sub>D</sub><sup>25</sup> = -36.4 (*c* = 1.0 in MeOH), <sup>2</sup> <sup>1</sup>H-NMR (500 MHz, CDCl<sub>3</sub>) δ 5.08 (s, 1H), 4.74 (d, *J* = 3.7 Hz, 1H), 4.52 (d, *J* = 2.8 Hz, 1H), 3.85 (s, 3H), 2.69-2.63 (m, 1H), 2.13-2.07 (m, 1H), 1.11 (d, *J* = 7.2 Hz, 3H), 1.05 (d, *J* = 6.9 Hz, 3H), 0.84 (d, *J* = 6.9 Hz, 3H), 0.74 (d, *J* = 6.9 Hz, 3H). <sup>13</sup>C-NMR (126 MHz, CDCl<sub>3</sub>) δ 180.3, 173.9, 170.7, 94.6, 76.2, 64.5, 58.7, 30.5, 28.7, 20.0, 18.8, 15.6, 15.3. HRMS (ES<sup>+</sup>) *m/z* [M+Na]<sup>+</sup> calcd 278.1363; found 278.1373. <sup>2</sup>

***(S)*-2-((*tert*-butoxycarbonyl)(methylamino)propanoic acid (**17**).**

To a solution of (*S*)-2-(methylamino)propanoic acid (400 mg, 3.88 mmol) in dry Ether (10 mL) was added Boc anhydride (2.54 g, 11.65 mmol) and 4N aqueous NaOH (2.5 mL) at 0 °C in the presence of nitrogen gas. The resulting solution was stirred at 0 °C to rt for 16h. After completion of the reaction, the reaction mixture was diluted with water (20 mL), and then extracted with EtOAc (3 × 20 mL). The combined organic layers were washed with brine, dried over Na<sub>2</sub>SO<sub>4</sub>, and concentrated on rotary evaporator to give the crude. The crude was purified with column chromatography on silica gel using EtOAc–hexane (5:5) as the eluent to obtain (*S*)-2-((*tert*-butoxycarbonyl)(methylamino)propanoic acid **17** (600 mg, 76%) as off white solid.  $[\alpha]_D^{20} = -41.7$  ( $c = 0.92$  in Dichloromethane),  $\lambda$ : 589.3 nm;  $^1\text{H-NMR}$  (500 MHz, DMSO-*d*<sub>6</sub>)  $\delta$  12.53 (s, 1H), 4.37 (d,  $J = 128.6$  Hz, 1H), 2.70 (s, 3H), 1.34 (d,  $J = 20.6$  Hz, 9H), 1.25 (s, 3H).  $^{13}\text{C-NMR}$  (126 MHz, CDCl<sub>3</sub>)  $\delta$  178.0, 177.6, 156.4, 155.3, 80.7, 55.1, 53.7, 31.4, 30.8, 28.4, 15.1, 14.7.

***(S)*-(*S*)-1-((*S*)-2-isopropyl-3-methoxy-5-oxo-2,5-dihydro-1H-pyrrol-1-yl)-3-methyl-1-oxobutan-2-yl 2-((*tert*-butoxycarbonyl)(methylamino)propanoate (**18**).**

To a solution of (*S*)-2-((*tert*-butoxycarbonyl)(methylamino)propanoic acid (**17**) (191 g, 0.94 mmol) and (*S*)-1-((*S*)-2-hydroxy-3-methylbutanoyl)-5-isopropyl-4-methoxy-1H-pyrrol-2(5H)-one (**16**) (200 mg, 0.78 mmol) in CH<sub>2</sub>Cl<sub>2</sub> (5 mL) was added DCC (194 mg, 0.94 mmol) and DMAP (95 mg, 0.78 mmol) at 0 °C in the presence of nitrogen gas. The resulting solution was stirred at 0 °C to rt for 16h. After completion of the reaction, the reaction mixture was diluted with water (10 mL), and then extracted with CH<sub>2</sub>Cl<sub>2</sub> (3 × 10 mL). The combined organic layers were washed with brine, dried over Na<sub>2</sub>SO<sub>4</sub>, and concentrated on rotary evaporator to give the crude. The crude was purified with column chromatography on silica gel using EtOAc–hexane (2:8) as the eluent to obtain (*S*)-(*S*)-1-((*S*)-2-isopropyl-3-methoxy-5-oxo-2,5-dihydro-1H-pyrrol-1-yl)-3-methyl-1-oxobutan-2-yl 2-((*tert*-butoxycarbonyl)(methylamino)propanoate **18** (300 mg, 87%) as colorless liquid.  $[\alpha]_D^{25} = -2.4$  ( $c = 1.0$  in CHCl<sub>3</sub>),  $^1\text{H-NMR}$  (500 MHz, CDCl<sub>3</sub>)  $\delta$  5.79 (d,  $J = 3.2$  Hz, 1H), 5.06 (s, 1H), 4.92-4.54 (m, 1H), 4.49 (d,  $J = 2.6$  Hz, 1H), 3.83 (s, 3H), 2.82 (d,  $J = 38.0$  Hz, 3H), 2.63-2.57 (m, 1H), 2.24-2.18 (m, 1H), 1.44 (s, 9H), 1.42 (d,  $J = 7.3$  Hz, 3H), 1.06 (dd,  $J = 12.7, 7.0$  Hz, 6H), 0.92 (d,  $J = 6.8$  Hz, 3H), 0.78 (d,  $J = 7.0$  Hz, 3H).  $^{13}\text{C-NMR}$  (126 MHz, CDCl<sub>3</sub>)  $\delta$  179.9, 172.0, 170.1, 169.1, 94.7, 78.0, 64.3, 58.6, 55.0, 53.5, 31.3, 30.7, 28.9, 28.4, 19.8, 18.8, 16.1, 15.3, 14.8. HRMS (FD<sup>+</sup>)  $m/z$  [M+H]<sup>+</sup> calcd for C<sub>22</sub>H<sub>36</sub>N<sub>2</sub>O<sub>7</sub>, 440.2517; found 440.2518.

***(S)*-(*S*)-1-((*S*)-2-isopropyl-3-methoxy-5-oxo-2,5-dihydro-1H-pyrrol-1-yl)-3-methyl-1-oxobutan-2-yl 2-((*S*)-2-((*tert*-butoxycarbonyl)amino)-N,3-dimethylbutanamido)propanoate (**3**).**

A solution of compound (*S*)-(*S*)-1-((*S*)-2-isopropyl-3-methoxy-5-oxo-2,5-dihydro-1H-pyrrol-1-yl)-3-methyl-1-oxobutan-2-yl 2-((*tert*-butoxycarbonyl)(methylamino)propanoate (**18**) (250 mg, 0.57 mmol) in HCl dioxane (4 N) (2 mL) was stirred at 0 °C to rt for 2h in the presence of nitrogen gas. After completion of the reaction, the reaction mixture was concentrated to afford a hydrochloride compound. The product would be used to next step without further purification. To a solution of hydrochloride compound and (*S*)-2-((*tert*-butoxycarbonyl)amino)-3-methylbutanoic acid (**7**) (148 mg, 0.68 mmol) in CH<sub>2</sub>Cl<sub>2</sub> (5 mL) was added DIPEA (220 mg, 1.71 mmol) and HATU (325 mg, 0.85 mmol) at rt in the presence of nitrogen gas. The resulting solution was stirred at rt for 16h. After completion of the reaction, the reaction mixture was diluted with water (10 mL), and then extracted with

CH<sub>2</sub>Cl<sub>2</sub> (3 × 10 mL). The combined organic layers were washed with brine, dried over Na<sub>2</sub>SO<sub>4</sub>, and concentrated on rotary evaporator to give the crude. The crude was purified with column chromatography on silica gel using EtOAc–hexane (4:6) as the eluent to obtain (S)-(S)-1-((S)-2-isopropyl-3-methoxy-5-oxo-2,5-dihydro-1H-pyrrol-1-yl)-3-methyl-1-oxobutan-2-yl 2-((S)-2-((tert-butoxycarbonyl)amino)-N,3-dimethylbutanamido)propanoate **3** (230 mg, 75%) as off white solid.  $[\alpha]_D^{25} = -6.66$  ( $c = 1.0$  in CHCl<sub>3</sub>), <sup>1</sup>H-NMR (500 MHz, CDCl<sub>3</sub>)  $\delta$  5.80 (d,  $J = 3.2$  Hz, 1H), 5.28 (q,  $J = 7.1$  Hz, 2H), 5.06 (s, 1H), 4.49 (d,  $J = 2.8$  Hz, 1H), 4.47-4.46 (m, 1H), 3.84 (s, 4H), 3.01 (s, 3H), 2.61-2.55 (m, 1H), 2.23-2.18 (m, 1H), 1.99 (m, 1H), 1.43 (d,  $J = 7.3$  Hz, 3H), 1.42 (s, 9H), 1.08 (d,  $J = 7.1$  Hz, 3H), 1.05-1.03 (m, 3H), 0.99 (d,  $J = 6.8$  Hz, 3H), 0.90 (dd,  $J = 14.4, 6.7$  Hz, 6H), 0.77 (d,  $J = 6.8$  Hz, 3H). <sup>13</sup>C-NMR (126 MHz, CDCl<sub>3</sub>)  $\delta$  179.9, 172.5, 171.2, 170.0, 169.1, 156.0, 94.6, 79.5, 78.3, 64.3, 58.6, 55.2, 52.6, 31.8, 31.4, 28.8, 28.4, 19.7, 19.6, 18.8, 17.2, 16.0, 15.3, 14.2. HRMS (FD<sup>+</sup>)  $m/z$  [M+H]<sup>+</sup> calcd for C<sub>27</sub>H<sub>45</sub>N<sub>3</sub>O<sub>8</sub>, 539.3201; found 539.3201.

**(S)-(S)-1-((S)-2-isopropyl-3-methoxy-5-oxo-2,5-dihydro-1H-pyrrol-1-yl)-3-methyl-1-oxobutan-2-yl 2-((S)-2-((S)-3-hydroxydecanamido)-N,3-dimethylbutanamido)propanoate (1a).**

To a solution of (S)-(S)-1-((S)-2-isopropyl-3-methoxy-5-oxo-2,5-dihydro-1H-pyrrol-1-yl)-3-methyl-1-oxobutan-2-yl 2-((S)-2-((tert-butoxycarbonyl)amino)-N,3-dimethylbutanamido)propanoate (**3**) (60 mg, 0.11 mmol,) in 2,2,2-trifluoroethanol, (1 mL) was added TMSCl, (0.15 mL) at 0 °C in the presence of nitrogen gas. The resulting solution was stirred at 0 °C to rt for 2h. After completion of the reaction, the reaction mixture was concentrated to afford a compound (**19**). The product would be used to next step without further purification. To a solution of hydrochloride compound and (S)-3-hydroxydecanoic acid (**2a**) (21 mg, 0.11 mmol,) in CH<sub>2</sub>Cl<sub>2</sub> (5 mL) was added DIPEA (43 mg, 0.33 mmol,) and HATU (62.7 mg, 0.165 mmol,) at rt in the presence of nitrogen gas. The resulting solution was stirred at rt for 16h. After completion of the reaction, the reaction mixture was diluted with water (10 mL), and then extracted with CH<sub>2</sub>Cl<sub>2</sub> (3 × 10 mL). The combined organic layers were washed with brine, dried over Na<sub>2</sub>SO<sub>4</sub>, and concentrated on rotary evaporator to give the crude. The crude was purified with column chromatography on silica gel using EtOAc–hexane (5:5) as the eluent to obtain (S)-(S)-1-((S)-2-isopropyl-3-methoxy-5-oxo-2,5-dihydro-1H-pyrrol-1-yl)-3-methyl-1-oxobutan-2-yl 2-((S)-2-((S)-3-hydroxydecanamido)-N,3-dimethylbutanamido)propanoate **1a** (40 mg, 58%) as white solid.  $[\alpha]_D^{25} = -8.70$  ( $c = 1.0$  in MeOH), lit:  $[\alpha]_D^{25} = -17$  ( $c = 1.0$  in MeOH);<sup>7</sup> <sup>1</sup>H-NMR (500 MHz, CDCl<sub>3</sub>)  $\delta$  6.45 (d,  $J = 8.8$  Hz, 1H), 5.81 (d,  $J = 3.1$  Hz, 1H), 5.25 (q,  $J = 7.2$  Hz, 1H), 5.06 (s, 1H), 4.86 (dd,  $J = 8.8, 5.7$  Hz, 1H), 4.49 (d,  $J = 2.6$  Hz, 1H), 3.94 (s, 1H), 3.84 (s, 3H), 3.03 (s, 3H), 2.56 (tt,  $J = 7.1, 2.7$  Hz, 1H), 2.38 (dd,  $J = 15.4, 2.4$  Hz, 1H), 2.30 (d,  $J = 8.8$  Hz, 1H), 2.25-2.17 (m, 1H), 2.04 (dt,  $J = 12.5, 6.5$  Hz, 1H), 1.53 (dd,  $J = 8.8, 7.8$  Hz, 1H), 1.44 (d,  $J = 7.3$  Hz, 3H), 1.42-1.38 (m, 1H), 1.27 (m, 10H), 1.07 (d,  $J = 7.3$  Hz, 3H), 1.03 (d,  $J = 6.8$  Hz, 3H), 0.99 (d,  $J = 6.8$  Hz, 3H), 0.90 (d,  $J = 6.5$  Hz, 3H), 0.88 (d,  $J = 6.3$  Hz, 3H), 0.86 (t,  $J = 6.7$  Hz, 3H), 0.77 (d,  $J = 6.8$  Hz, 3H). <sup>13</sup>C-NMR (126 MHz, CDCl<sub>3</sub>)  $\delta$  180.0, 173.1, 172.2, 170.9, 170.2, 169.0, 94.6, 78.4, 68.8, 64.3, 58.6, 53.9, 52.9, 42.1, 36.9, 32.1, 31.9, 31.4, 29.6, 29.3, 28.8, 28.4, 25.5, 22.7, 19.7, 19.6, 18.7, 17.5, 16.0, 15.3, 14.2. HRMS (FD<sup>+</sup>)  $m/z$  [M+H]<sup>+</sup> calcd for C<sub>32</sub>H<sub>56</sub>N<sub>3</sub>O<sub>8</sub>, 610.4061; found 610.4063.

**(R)-4-benzyl-3-((S)-3-hydroxyoctanoyl)oxazolidine-2-one (9b).**

To a solution of SmI<sub>2</sub> (20 mL, 2.0 mmol, 0.1 M solution in THF) in dry THF (5 mL) was added dropwise solution

of (*R*)-4-benzyl-3-(2-bromoacetyl)oxazolidine-2-one (**5**) (200 mg, 0.67 mmol) and hexanal (**4b**) (67 mg, 0.67 mmol) in THF (5 mL) over 5 min at -78 °C in the presence of nitrogen gas. The resulting solution was stirred at -78 °C for 1h. After completion of the reaction, the reaction mixture was quenched with 1N HCl (2 mL), diluted with water, and then extracted with EtOAc (3 × 10 mL). The combined organic layers were washed with aqueous Sodium thiosulfate pentahydrate, brine, dried over Na<sub>2</sub>SO<sub>4</sub>, and concentrated on rotary evaporator to give the crude. The crude was purified with column chromatography on silica gel using EtOAc–hexane (4:6) as the eluent to obtain (*R*)-4-benzyl-3-((*S*)-3-hydroxyoctanoyl)oxazolidine-2-one **9b** (100 mg, 46%) as off white solid. Diastereomeric ratio (dr = 9.1:0.9, determined by isolated yield). <sup>1</sup>H-NMR (500 MHz, CDCl<sub>3</sub>) δ 7.35-7.31 (m, 2H), 7.29-7.25 (m, 1H), 7.20-7.18 (m, 2H), 4.71-4.66 (m, 1H), 4.23-4.16 (m, 1H), 4.15-4.11 (m, 1H), 3.30 (dd, *J* = 13.4, 3.3 Hz, 1H), 3.17 (dd, *J* = 17.4, 2.5 Hz, 1H), 2.97 (dd, *J* = 17.4, 9.5 Hz, 1H), 2.77 (dd, *J* = 13.4, 9.7 Hz, 1H), 2.64 (s, 1H), 1.61-1.55 (m, 1H), 1.50-1.45 (m, 2H), 1.38-1.24 (m, 5H), 0.89 (t, *J* = 6.9 Hz, 3H). <sup>13</sup>C-NMR (126 MHz, CDCl<sub>3</sub>) δ 172.9, 153.5, 135.2, 129.5, 129.1, 127.5, 68.0, 66.4, 55.2, 42.8, 38.0, 36.6, 31.8, 25.3, 22.7, 14.1.

**(*S*)-3-hydroxyoctanoic acid (2b).**

To a solution of (*R*)-4-benzyl-3-((*S*)-3-hydroxyoctanoyl)oxazolidine-2-one (**9b**) (90 mg, 0.28 mmol,) in THF: H<sub>2</sub>O 1:1 (5 mL) was added H<sub>2</sub>O<sub>2</sub> 30 % (w/w) in H<sub>2</sub>O (0.25 mL, 1.41 mmol) and LiOH (20 mg, 0.84 mmol) at 0 °C in the presence of nitrogen gas. The resulting solution was stirred at 0 °C to rt for 16h. After completion of the reaction, the reaction mixture was quenched with aqueous sodium thiosulfate pentahydrate (2 mL), and then extracted with EtOAc (3 × 10 mL). The combined organic layers were washed with brine, dried over Na<sub>2</sub>SO<sub>4</sub>, and concentrated on rotary evaporator to give the crude. The crude was purified with column chromatography on silica gel using MeOH–DCM (1:9) as the eluent to obtain (*S*)-3-hydroxydecanoic acid **2b** (35 mg, 78%) as off white solid. [ $\alpha$ ]<sub>D</sub><sup>22</sup> = +29.3 (*c* = 1.0 in CHCl<sub>3</sub>),<sup>9</sup> <sup>1</sup>H-NMR (500 MHz, CDCl<sub>3</sub>) δ 4.05-4.00 (m, 1H), 2.56 (dd, *J* = 16.5, 3.1 Hz, 1H), 2.46 (dd, *J* = 16.6, 8.9 Hz, 1H), 1.57-1.51 (m, 1H), 1.48-1.41 (m, 2H), 1.34-1.24 (m, 6H), 0.88 (t, *J* = 7.0 Hz, 3H). <sup>13</sup>C-NMR (126 MHz, CDCl<sub>3</sub>) δ 177.9, 68.1, 41.1, 36.5, 31.7, 25.2, 22.6, 14.1.

**(*S*)-(*S*)-1-((*S*)-2-isopropyl-3-methoxy-5-oxo-2,5-dihydro-1*H*-pyrrol-1-yl)-3-methyl-1-oxobutan-2-yl 2-((*S*)-2-((*S*)-3-hydroxyoctanamido)-*N*,3-dimethylbutanamido)propanoate (1b).**

To a solution of (*S*)-(*S*)-1-((*S*)-2-isopropyl-3-methoxy-5-oxo-2,5-dihydro-1*H*-pyrrol-1-yl)-3-methyl-1-oxobutan-2-yl 2-((*S*)-2-((*tert*-butoxycarbonyl)amino)-*N*,3-dimethylbutanamido)propanoate (**3**) (60 mg, 0.11 mmol,) in 2,2,2-trifluoroethanol, (1 mL) was added TMSCl, (0.15 mL) at 0 °C in the presence of nitrogen gas. The resulting solution was stirred at 0 °C to rt for 2h. After completion of the reaction, the reaction mixture was concentrated to afford a compound (**19**). The product would be used to next step without further purification. To a solution of hydrochloride compound and (*S*)-3-hydroxydecanoic acid (**2b**) (18 mg, 0.11 mmol,) in CH<sub>2</sub>Cl<sub>2</sub> (5 mL) was added DIPEA (43 mg, 0.33 mmol,) and HATU (62.7 mg, 0.16 mmol,) at rt in the presence of nitrogen gas. The resulting solution was stirred at rt for 16h. After completion of the reaction, the reaction mixture was diluted with water (10 mL), and then extracted with CH<sub>2</sub>Cl<sub>2</sub> (3 × 10 mL). The combined organic layers were washed with brine, dried over Na<sub>2</sub>SO<sub>4</sub>, and concentrated on rotary evaporator to give the crude. The crude was purified with column chromatography on silica gel using EtOAc–hexane (5:5) as the eluent to obtain (*S*)-(*S*)-1-((*S*)-2-isopropyl-3-

methoxy-5-oxo-2,5-dihydro-1*H*-pyrrol-1-yl)-3-methyl-1-oxobutan-2-yl 2-((*S*)-2-((*S*)-3-hydroxyoctanamido)-*N*,3-dimethylbutanamido)propanoate **1b** (35 mg, 54%) as white solid.  $[\alpha]_{\text{D}}^{25} = -14.07$  ( $c = 1.0$  in MeOH); lit:  $[\alpha]_{\text{D}}^{22} = -32.6$  ( $c = 1.0$  in MeOH),  $^1\text{H-NMR}$  (500 MHz,  $\text{CDCl}_3$ )  $\delta$  6.51 (d,  $J = 8.8$  Hz, 1H), 5.81 (d,  $J = 3.2$  Hz, 1H), 5.25 (q,  $J = 7.2$  Hz, 1H), 5.06 (s, 1H), 4.85 (dd,  $J = 8.9, 5.7$  Hz, 1H), 4.48 (d,  $J = 2.8$  Hz, 1H), 3.95 (s, 1H), 3.83 (s, 3H), 3.04 (s, 3H), 2.56 (tt,  $J = 7.1, 2.7$  Hz, 1H), 2.39 (dd,  $J = 15.4, 2.4$  Hz, 1H), 2.29 (dd,  $J = 15.3, 8.8$  Hz, 1H), 2.24-2.18 (m, 1H), 2.04 (td,  $J = 13.1, 6.6$  Hz, 1H), 1.53 (dd,  $J = 8.8, 7.8$  Hz, 1H), 1.44 (d,  $J = 7.1$  Hz, 3H), 1.42-1.38 (m, 1H), 1.33-1.24 (m, 6H), 1.07 (d,  $J = 7.1$  Hz, 3H), 1.03 (d,  $J = 6.9$  Hz, 3H), 0.99 (d,  $J = 6.8$  Hz, 3H), 0.89 (d,  $J = 6.3$  Hz, 3H), 0.87 (d,  $J = 6.3$  Hz, 3H), 0.85 (t,  $J = 6.7$  Hz, 3H), 0.76 (d,  $J = 7.0$  Hz, 3H).  $^{13}\text{C-NMR}$  (126 MHz,  $\text{CDCl}_3$ )  $\delta$  180.0, 172.9, 172.1, 170.9, 170.1, 169.0, 94.6, 78.4, 68.7, 64.3, 58.6, 53.8, 52.8, 42.2, 36.9, 32.0, 31.8, 31.4, 28.8, 28.4, 25.2, 22.6, 19.8, 19.7, 19.6, 18.7, 17.4, 16.0, 15.3, 14.2, 14.1. HRMS (FD<sup>+</sup>)  $m/z$   $[\text{M}+\text{H}]^+$  calcd for  $\text{C}_{30}\text{H}_{52}\text{N}_3\text{O}_8$ , 582.3748; found 582.3743.

**(*R*)-4-benzyl-3-((*S*)-3-hydroxydodecanoyl)oxazolidine-2-one (9c).**

To a solution of  $\text{SmI}_2$  (20 mL, 2.0 mmol, 0.1 M solution in THF) in dry THF (5 mL) was added dropwise solution of (*R*)-4-benzyl-3-(2-bromoacetyl)oxazolidine-2-one (**5**) (200 mg, 0.67 mmol) and decanal (**4c**) (105 mg, 0.67 mmol) in THF (5 mL) over 5 min at  $-78^\circ\text{C}$  in the presence of nitrogen gas. The resulting solution was stirred at  $-78^\circ\text{C}$  for 1h. After completion of the reaction, the reaction mixture was quenched with 1N HCl (2 mL), diluted with water, and then extracted with EtOAc ( $3 \times 10$  mL). The combined organic layers were washed with aqueous Sodium thiosulfate pentahydrate, brine, dried over  $\text{Na}_2\text{SO}_4$ , and concentrated on rotary evaporator to give the crude. The crude was purified with column chromatography on silica gel using EtOAc–hexane (4:6) as the eluent to obtain (*R*)-4-benzyl-3-((*S*)-3-hydroxydodecanoyl)oxazolidine-2-one **9c** (110 mg, 44%) as off white solid. Diastereomeric ratio (dr = 8.1:1.9, determined by isolated yield).  $^1\text{H-NMR}$  (500 MHz,  $\text{CDCl}_3$ )  $\delta$  7.34-7.32 (m, 2H), 7.29-7.25 (m, 1H), 7.20-7.18 (m, 2H), 4.71-4.66 (m, 1H), 4.23-4.16 (m, 2H), 4.15-4.10 (m, 1H), 3.30 (dd,  $J = 13.5, 3.2$  Hz, 1H), 3.17 (dd,  $J = 17.4, 2.5$  Hz, 1H), 2.97 (dd,  $J = 17.4, 9.5$  Hz, 1H), 2.77 (dd,  $J = 13.5, 9.6$  Hz, 1H), 1.62-1.56 (m, 1H), 1.53-1.44 (m, 2H), 1.38-1.26 (m, 14H), 0.87 (t,  $J = 7.0$  Hz, 3H).  $^{13}\text{C-NMR}$  (126 MHz,  $\text{CDCl}_3$ )  $\delta$  173.0, 153.5, 135.2, 129.5, 129.1, 127.5, 68.0, 66.4, 55.2, 42.8, 38.0, 36.7, 32.0, 29.7, 29.4, 25.6, 22.8, 14.2.

**(*S*)-3-hydroxydodecanoic acid (2c).**

To a solution of (*R*)-4-benzyl-3-((*S*)-3-hydroxydodecanoyl)oxazolidine-2-one (**9c**) (100 mg, 0.26 mmol,) in THF:  $\text{H}_2\text{O}$  1:1 (5 mL) was added  $\text{H}_2\text{O}_2$  30 % (w/w) in  $\text{H}_2\text{O}$  (0.25 mL, 1.33 mmol) and LiOH (20 mg, 0.80 mmol) at  $0^\circ\text{C}$  in the presence of nitrogen gas. The resulting solution was stirred at  $0^\circ\text{C}$  to rt for 16h. After completion of the reaction, the reaction mixture was quenched with aqueous sodium thiosulfate pentahydrate (2 mL), and then extracted with EtOAc ( $3 \times 10$  mL). The combined organic layers were washed with brine, dried over  $\text{Na}_2\text{SO}_4$ , and concentrated on rotary evaporator to give the crude. The crude was purified with column chromatography on silica gel using MeOH–DCM (1:9) as the eluent to obtain (*S*)-3-hydroxydodecanoic acid **2c** (30 mg, 52%) as off white solid.  $[\alpha]_{\text{D}}^{22} = +18.7$  ( $c = 1.0$  in  $\text{CHCl}_3$ ),  $^{10}\text{H-NMR}$  (500 MHz,  $\text{CDCl}_3$ )  $\delta$  4.04-4.00 (m, 1H), 2.57 (dd,  $J = 16.5, 3.1$  Hz, 1H), 2.47 (dd,  $J = 16.6, 9.0$  Hz, 1H), 1.57-1.52 (m, 1H), 1.50-1.42 (m, 2H), 1.33-1.25 (m, 14H), 0.87 (t,  $J = 7.0$  Hz, 3H).  $^{13}\text{C-NMR}$  (126 MHz,  $\text{CDCl}_3$ )  $\delta$  177.7, 68.1, 41.1, 36.6, 32.0, 29.6, 29.5, 29.4, 25.5, 22.7, 14.2.

**(S)-(S)-1-((S)-2-isopropyl-3-methoxy-5-oxo-2,5-dihydro-1H-pyrrol-1-yl)-3-methyl-1-oxobutan-2-yl 2-((S)-2-((S)-3-hydroxydodecanamido)-N,3-dimethylbutanamido)propanoate (1c).**

To a solution of (S)-(S)-1-((S)-2-isopropyl-3-methoxy-5-oxo-2,5-dihydro-1H-pyrrol-1-yl)-3-methyl-1-oxobutan-2-yl 2-((S)-2-((*tert*-butoxycarbonyl)amino)-N,3-dimethylbutanamido)propanoate (**3**) (50 mg, 0.092 mmol,) in 2,2,2 trifluoroethanol, (1 mL) was added TMSCl, (0.15 mL) at 0 °C in the presence of nitrogen gas. The resulting solution was stirred at 0 °C to rt for 2h. After completion of the reaction, the reaction mixture was concentrated to afford a compound (**19**). The product would be used to next step without further purification. To a solution of hydrochloride compound and (S)-3-hydroxydodecanoic acid (**2c**) (20 mg, 0.092 mmol,) in CH<sub>2</sub>Cl<sub>2</sub> (5 mL) was added DIPEA (36 mg, 0.278 mmol,) and HATU (52.5 mg, 0.138 mmol,) at rt in the presence of nitrogen gas. The resulting solution was stirred at rt for 16h. After completion of the reaction, the reaction mixture was diluted with water (10 mL), and then extracted with CH<sub>2</sub>Cl<sub>2</sub> (3 × 10 mL). The combined organic layers were washed with brine, dried over Na<sub>2</sub>SO<sub>4</sub>, and concentrated on rotary evaporator to give the crude. The crude was purified with column chromatography on silica gel using EtOAc–hexane (5:5) as the eluent to obtain (S)-(S)-1-((S)-2-isopropyl-3-methoxy-5-oxo-2,5-dihydro-1H-pyrrol-1-yl)-3-methyl-1-oxobutan-2-yl 2-((S)-2-((S)-3-hydroxydodecanamido)-N,3-dimethylbutanamido)propanoate **1c** (25 mg, 43%) as white solid.  $[\alpha]_{\text{D}}^{25} = -23.00$  ( $c = 1.0$  in MeOH); lit:  $[\alpha]_{\text{D}}^{21} = -16.5$  ( $c = 1.0$  in MeOH), <sup>1</sup>H-NMR (500 MHz, CDCl<sub>3</sub>)  $\delta$  6.44 (d,  $J = 8.9$  Hz, 1H), 5.81 (d,  $J = 3.2$  Hz, 1H), 5.25 (q,  $J = 7.2$  Hz, 1H), 5.06 (s, 1H), 4.86 (dd,  $J = 8.9, 5.7$  Hz, 1H), 4.49 (d,  $J = 2.6$  Hz, 1H), 3.96-3.91 (m, 1H), 3.84 (s, 3H), 3.03 (s, 3H), 2.56 (tt,  $J = 7.1, 2.7$  Hz, 1H), 2.40 (dd,  $J = 15.3, 2.7$  Hz, 1H), 2.29 (d,  $J = 8.9$  Hz, 1H), 2.25-2.19 (m, 1H), 2.04 (dt,  $J = 12.5, 6.5$  Hz, 1H), 1.53 (dd,  $J = 8.8, 7.8$  Hz, 1H), 1.44 (d,  $J = 7.1$  Hz, 3H), 1.42-1.38 (m, 1H), 1.25 (m, 14H), 1.07 (d,  $J = 7.3$  Hz, 3H), 1.03 (d,  $J = 6.8$  Hz, 3H), 0.99 (d,  $J = 6.8$  Hz, 3H), 0.90 (d,  $J = 6.5$  Hz, 3H), 0.88 (d,  $J = 6.3$  Hz, 3H), 0.86 (t,  $J = 6.7$  Hz, 3H), 0.76 (d,  $J = 7.0$  Hz, 3H). <sup>13</sup>C-NMR (126 MHz, CDCl<sub>3</sub>)  $\delta$  179.9, 172.5, 172.0, 171.0, 170.1, 169.1, 94.6, 78.3, 68.7, 64.3, 58.6, 53.5, 52.7, 42.4, 36.9, 32.0, 31.9, 31.4, 29.6, 29.6, 29.4, 28.8, 28.4, 25.6, 22.7, 19.7, 19.7, 18.8, 17.4, 16.0, 15.3, 14.2. HRMS (FD<sup>+</sup>)  $m/z$  [M+H]<sup>+</sup> calcd for C<sub>34</sub>H<sub>60</sub>N<sub>3</sub>O<sub>8</sub>, 638.4375; found 638.4376.

**IV. NMR comparison of natural Kavaratamide A [500 MHz (<sup>1</sup>H) and 125 MHz (<sup>13</sup>C) in CDCl<sub>3</sub>] and synthetic Kavaratamide A [500 MHz (<sup>1</sup>H) and 125 MHz (<sup>13</sup>C) in CDCl<sub>3</sub>].**

| Position     |       | Natural<br>Kavaratamide A             |                       | Synthetic<br>Kavaratamide A          |            | Difference<br>value |            |
|--------------|-------|---------------------------------------|-----------------------|--------------------------------------|------------|---------------------|------------|
|              |       | $\delta$ H ( <i>J</i> in Hz)          | $\delta$ C            | $\delta$ H ( <i>J</i> in Hz)         | $\delta$ C | $\delta$ H          | $\delta$ C |
| iPr-O-Me-Pyr | 1     | 3.85, s                               | 58.7, CH <sub>3</sub> | 3.84, s                              | 58.6       | -0.01               | -0.1       |
|              | 2     |                                       | 170.2, C              |                                      | 170.2      |                     | 0.0        |
|              | 3     | 5.07, s                               | 94.7, CH              | 5.06, s                              | 94.6       | -0.01               | -0.1       |
|              | 4     |                                       | 180.0, C              |                                      | 180.0      |                     | 0.0        |
|              | 5     | 4.50, d (2.5)                         | 64.4, CH              | 4.49, d (2.6)                        | 64.3       | -0.01               | -0.1       |
|              | 6     | 2.56, sepd<br>(7.5, 2.5)              | 28.5, CH              | 2.56, sepd (7.1,<br>2.7)             | 28.4       | 0.0                 | -0.1       |
|              | 7     | 1.09, d (7.5)                         | 18.8, CH <sub>3</sub> | 1.07, d (7.3)                        | 18.7       | -0.02               | -0.1       |
|              | 8     | 0.78, d (7.0)                         | 15.3, CH <sub>3</sub> | 0.77, d (6.8)                        | 15.3       | -0.01               | 0.0        |
| Hiva         | 9     |                                       | 169.1, C              |                                      | 169.0      |                     | -0.1       |
|              | 10    | 5.82, d (3.5)                         | 78.4, CH              | 5.81, d (3.1)                        | 78.4       | -0.01               | 0.0        |
|              | 11    | 2.23, sepd<br>(6.5, 3.0)              | 28.9, CH              | 2.23, sepd (7.5,<br>2.5)             | 28.8       | 0.0                 | -0.1       |
|              | 12    | 1.05, d (6.5)                         | 19.8, CH <sub>3</sub> | 1.03, d (6.8)                        | 19.7       | -0.02               | -0.1       |
|              | 13    | 0.92, d (7.0)                         | 16.1, CH <sub>3</sub> | 0.90, d (6.5)                        | 16.0       | -0.02               | -0.1       |
| N-Me-Ala     | 14    |                                       | 171.1, C              |                                      | 170.9      |                     | -0.2       |
|              | 15    | 5.29, q (7.0)                         | 52.8, CH              | 5.25, q (7.2)                        | 52.9       | -0.04               | 0.1        |
|              | 16    | 1.46, d (7.0)                         | 14.2, CH <sub>3</sub> | 1.44, d (7.3)                        | 14.2       | -0.01               | 0.0        |
|              | 17    | 3.04, s                               | 31.9, CH <sub>3</sub> | 3.03, s                              | 31.9       | -0.01               | 0.0        |
| Val          | 18    |                                       | 172.3, C              |                                      | 172.2      |                     | -0.1       |
|              | 19    | 4.84, dd (8.5, 5.5)                   | 53.9, CH              | 4.86, dd (8.8, 5.7)                  | 53.9       | 0.02                | 0.0        |
|              | 20    | 2.06, sepd (7.0)                      | 31.3, CH              | 2.04, dt (12.5, 6.5)                 | 31.4       | -0.02               | 0.1        |
|              | 21    | 1.01, d (7.0)                         | 19.8, CH <sub>3</sub> | 0.99, d (6.8)                        | 19.6       | -0.02               | -0.2       |
|              | 22    | 0.91, d (6.5)                         | 17.4, CH <sub>3</sub> | 0.88, d (6.3)                        | 17.5       | -0.02               | 0.1        |
|              | 19-NH | 6.54, d (8.5)                         |                       | 6.45, d (8.8)                        |            | -0.09               |            |
| 3-HDA        | 23    |                                       | 172.9, C              |                                      | 173.1      |                     | 0.2        |
|              | 24a   | 2.38, dd (15, 2.5)                    | 42.9, CH <sub>2</sub> | 2.38, dd (15.4,<br>2.4)              | 42.1       | 0.0                 | -0.8       |
|              | 24b   | 2.29, dd (15, 9.5)                    |                       | 2.30 d (8.8)                         |            | 0.01                |            |
|              | 25    |                                       | 69.0, CH              | 3.94, br s                           | 68.8       | 0.0                 | -0.2       |
|              | 26a   | 1.54, dd (17.0, 7.5)<br>1.42, overlap | 37.1, CH <sub>2</sub> | 1.53, dd (8.8, 7.8)<br>1.44, overlap | 36.9       | 0.0                 | -0.2       |
|              | 26b   |                                       |                       |                                      |            | 0.0                 | 0.0        |
|              | 27    | 1.43-1.24, m                          | 25.6, CH <sub>2</sub> | 1.43-1.24, m                         | 25.5       | 0.0                 | -0.1       |

|  |    |               |                        |               |      |     |      |
|--|----|---------------|------------------------|---------------|------|-----|------|
|  | 28 | 1.43-1.24, m  | 29.7c, CH <sub>2</sub> | 1.43-1.24, m  | 29.6 | 0.0 | -0.1 |
|  | 29 | 1.43-1.24, m  | 29.4c, CH <sub>2</sub> | 1.43-1.24, m  | 29.3 | 0.0 | -0.1 |
|  | 30 | 1.43-1.24, m  | 31.9, CH <sub>2</sub>  | 1.43-1.24, m  | 32.1 | 0.0 | 0.2  |
|  | 31 | 1.43-1.24, m  | 22.8, CH <sub>2</sub>  | 1.43-1.24, m  | 22.7 | 0.0 | -0.1 |
|  | 32 | 0.88, t (7.0) | 14.3, CH <sub>3</sub>  | 0.87, t (6.7) | 14.2 | 0.0 | -0.1 |



**V. NMR values of synthetic Kavaratamide B & Kavaratamide C [500 MHz (<sup>1</sup>H) and 125 MHz (<sup>13</sup>C) in CDCl<sub>3</sub>].**

| Position     |       | Synthetic<br>Kavaratamide B           |                       | Synthetic<br>Kavaratamide C          |            |
|--------------|-------|---------------------------------------|-----------------------|--------------------------------------|------------|
|              |       | $\delta$ H ( <i>J</i> in Hz)          | $\delta$ C            | $\delta$ H ( <i>J</i> in Hz)         | $\delta$ C |
| iPr-O-Me-Pyr | 1     | 3.83, s                               | 58.6, CH <sub>3</sub> | 3.84, s                              | 58.6       |
|              | 2     |                                       | 170.1, C              |                                      | 170.1      |
|              | 3     | 5.06, s                               | 94.6, CH              | 5.06, s                              | 94.6       |
|              | 4     |                                       | 180.0, C              |                                      | 179.9      |
|              | 5     | 4.48, d (2.8)                         | 64.3, CH              | 4.49, d (2.6)                        | 64.3       |
|              | 6     | 2.56, sepd<br>(7.1, 2.7)              | 28.4, CH              | 2.56, sepd<br>(7.1, 2.7)             | 28.4       |
|              | 7     | 1.07, d (7.1)                         | 18.7, CH <sub>3</sub> | 1.07, d (7.3)                        | 18.8       |
|              | 8     | 0.76, d (7.0)                         | 15.3, CH <sub>3</sub> | 0.76, d (7.0)                        | 15.3       |
| Hiva         | 9     |                                       | 169.0, C              |                                      | 169.1      |
|              | 10    | 5.81, d (3.2)                         | 78.4, CH              | 5.81, d (3.2)                        | 78.3       |
|              | 11    | 2.23, sepd<br>(6.5, 3.0)              | 28.8, CH              | 2.23, sepd<br>(7.5, 2.5)             | 28.8       |
|              | 12    | 1.03, d (6.9)                         | 19.7, CH <sub>3</sub> | 1.03, d (6.8)                        | 19.7       |
|              | 13    | 0.89, d (6.3)                         | 16.0, CH <sub>3</sub> | 0.90, d (6.5)                        | 16.0       |
| N-Me-Ala     | 14    |                                       | 170.9, C              |                                      | 171.0      |
|              | 15    | 5.25, q (7.2)                         | 52.8, CH              | 5.25, q (7.2)                        | 52.7       |
|              | 16    | 1.44, d (7.1)                         | 14.1, CH <sub>3</sub> | 1.44, d (7.1)                        | 14.2       |
|              | 17    | 3.04, s                               | 31.8, CH <sub>3</sub> | 3.03, s                              | 31.9       |
| Val          | 18    |                                       | 172.1, C              |                                      | 172.0      |
|              | 19    | 4.85, dd (8.9, 5.7)                   | 53.8, CH              | 4.86, dd (8.9, 5.7)                  | 53.5       |
|              | 20    | 2.04, sepd (7.0)                      | 31.4, CH              | 2.04, dt (12.5, 6.5)                 | 31.4       |
|              | 21    | 0.99, d (6.8)                         | 19.8, CH <sub>3</sub> | 0.99, d (6.8)                        | 19.7       |
|              | 22    | 0.87, d (6.3)                         | 17.4, CH <sub>3</sub> | 0.88, d (6.3)                        | 17.4       |
|              | 19-NH | 6.51, d (8.8)                         |                       | 6.44, d (8.9)                        |            |
| 3-HDA        | 23    |                                       | 172.9, C              |                                      | 172.5      |
|              | 24a   | 2.39, dd (15.4, 2.4)                  | 42.2, CH <sub>2</sub> | 2.40, dd (15.3, 2.7)                 | 42.4       |
|              | 24b   | 2.29, dd (15.3, 8.8)                  |                       | 2.29 d (8.9)                         |            |
|              | 25    | 3.95, br s                            | 68.7, CH              | 3.94, br s                           | 68.7       |
|              | 26a   | 1.53, dd (17.0, 7.8)<br>1.44, overlap | 36.9, CH <sub>2</sub> | 1.53, dd (8.8, 7.8)<br>1.42, overlap | 36.9       |
|              | 26b   |                                       |                       |                                      |            |
|              | 27    | 1.43-1.24, m                          | 25.2, CH <sub>2</sub> | 1.43-1.24, m                         | 25.6       |
|              | 28    | ---                                   | ---                   | 1.43-1.24, m                         | 29.6       |

|  |    |               |                       |               |      |
|--|----|---------------|-----------------------|---------------|------|
|  | 29 | ---           | ---                   | 1.43-1.24, m  | 29.6 |
|  | 30 | ---           | ---                   | 1.43-1.24, m  | 29.4 |
|  | 31 | 1.43-1.24, m  | 32.0, CH <sub>2</sub> | 1.43-1.24, m  | 32.0 |
|  | 32 | 1.43-1.24, m  | 22.6, CH <sub>2</sub> | 1.43-1.24, m  | 22.7 |
|  | 33 | 0.85, t (6.7) | 14.2, CH <sub>3</sub> | 0.86, t (6.7) | 14.2 |

**VI. Comparison of optical rotation of Kavaratamide A, B and C**

| <b>Compound</b>       | <b>Optical rotation for Natural<br/>compound</b> | <b>Optical rotation for Synthetic<br/>compound</b> |
|-----------------------|--------------------------------------------------|----------------------------------------------------|
| <b>Kavaratamide A</b> | -17                                              | -8.70                                              |
| <b>Kavaratamide B</b> | NA                                               | -14.07                                             |
| <b>Kavaratamide C</b> | NA                                               | -23.0                                              |

**Note:** all optical rotation recorded under the condition of  $[\alpha]_D^{25}$  and  $c = 1.0$ , MeOH

## VII. The copies of $^1\text{H}$ and $^{13}\text{C}$ NMR spectra

### (*R*)-4-benzyl-3-(2-bromoacetyl)oxazolidine-2-one (5)

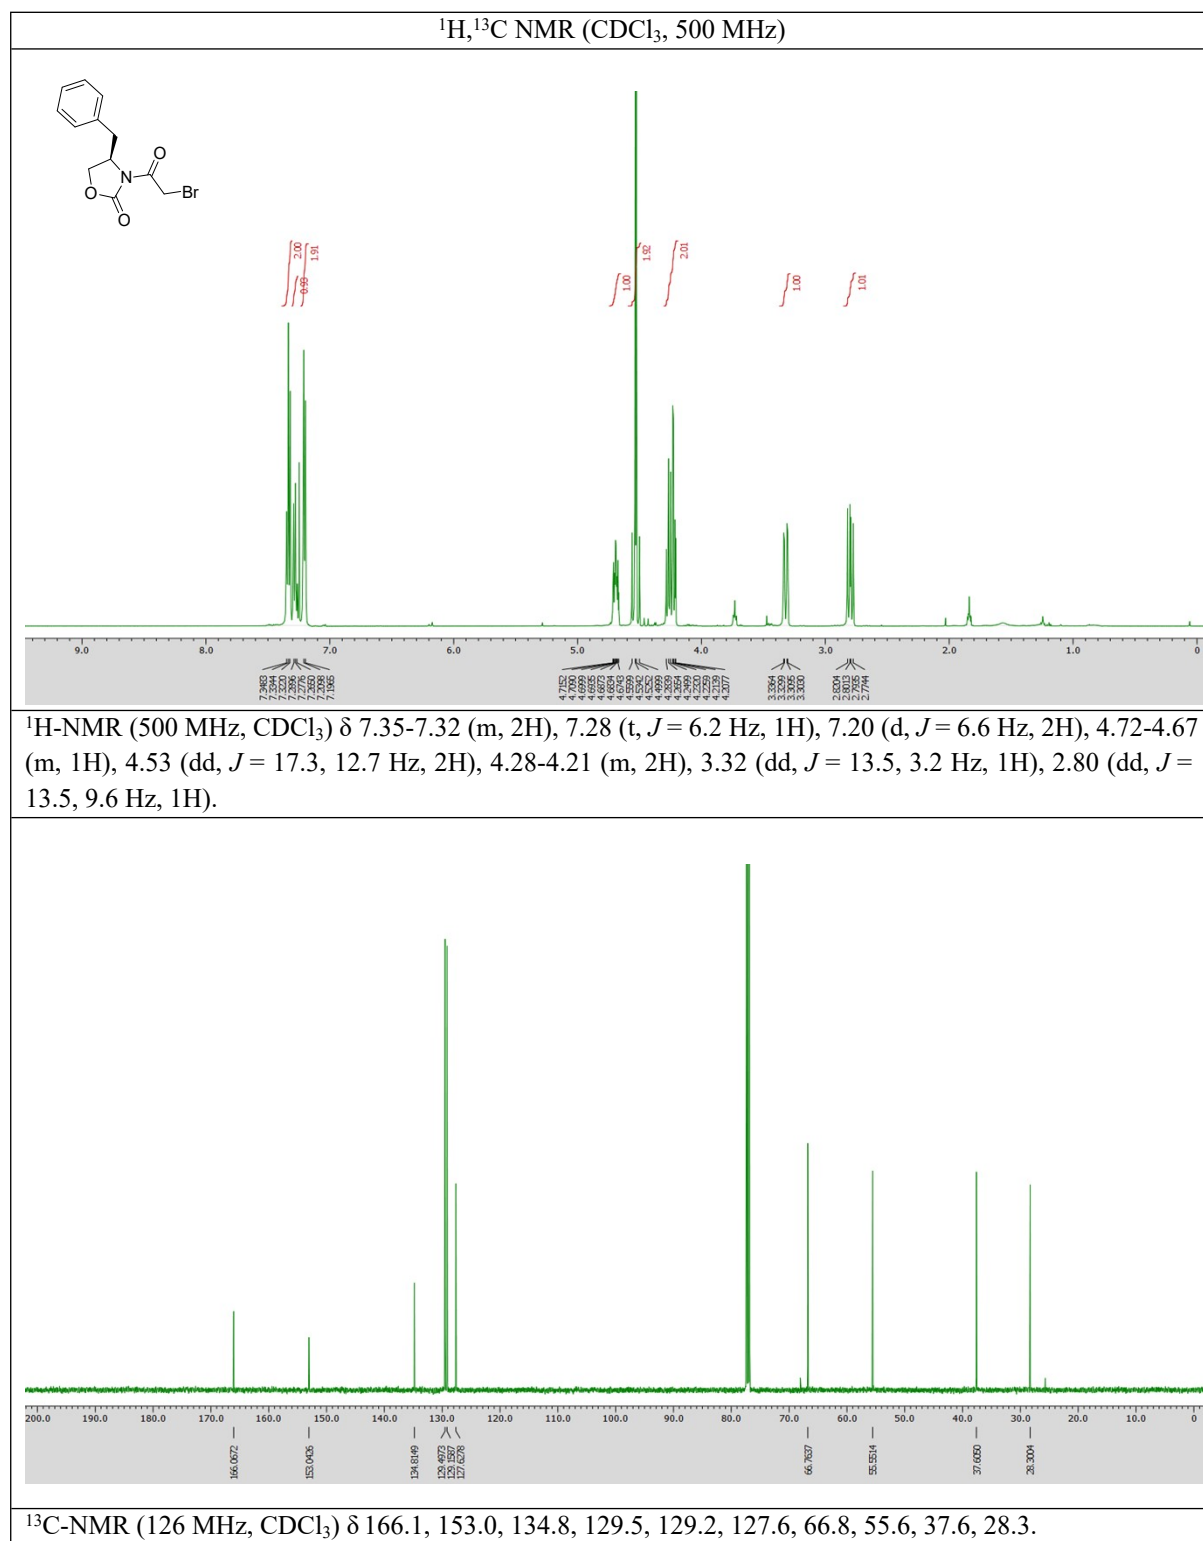

**(R)-4-benzyl-3-((S)-3-hydroxydecanoyl)oxazolidine-2-one (9a)**

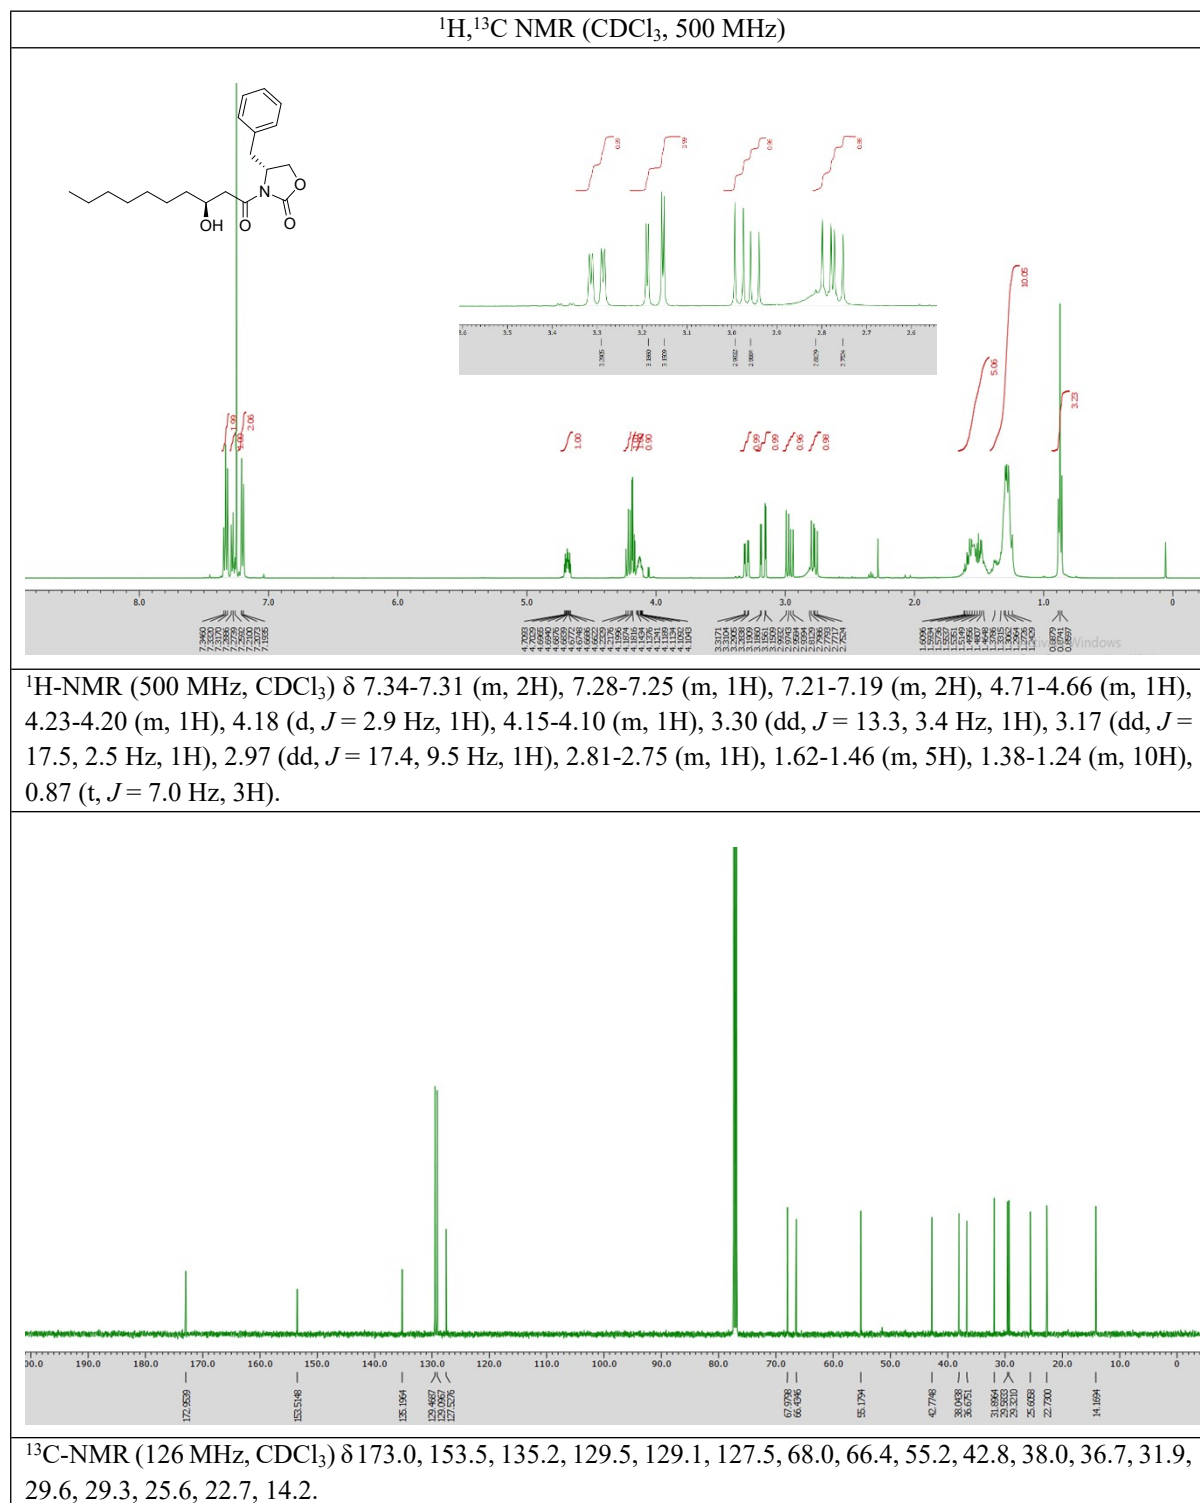

**(R)-4-benzyl-3-((R)-3-hydroxydecanoyl)oxazolidine-2-one(9aa)**

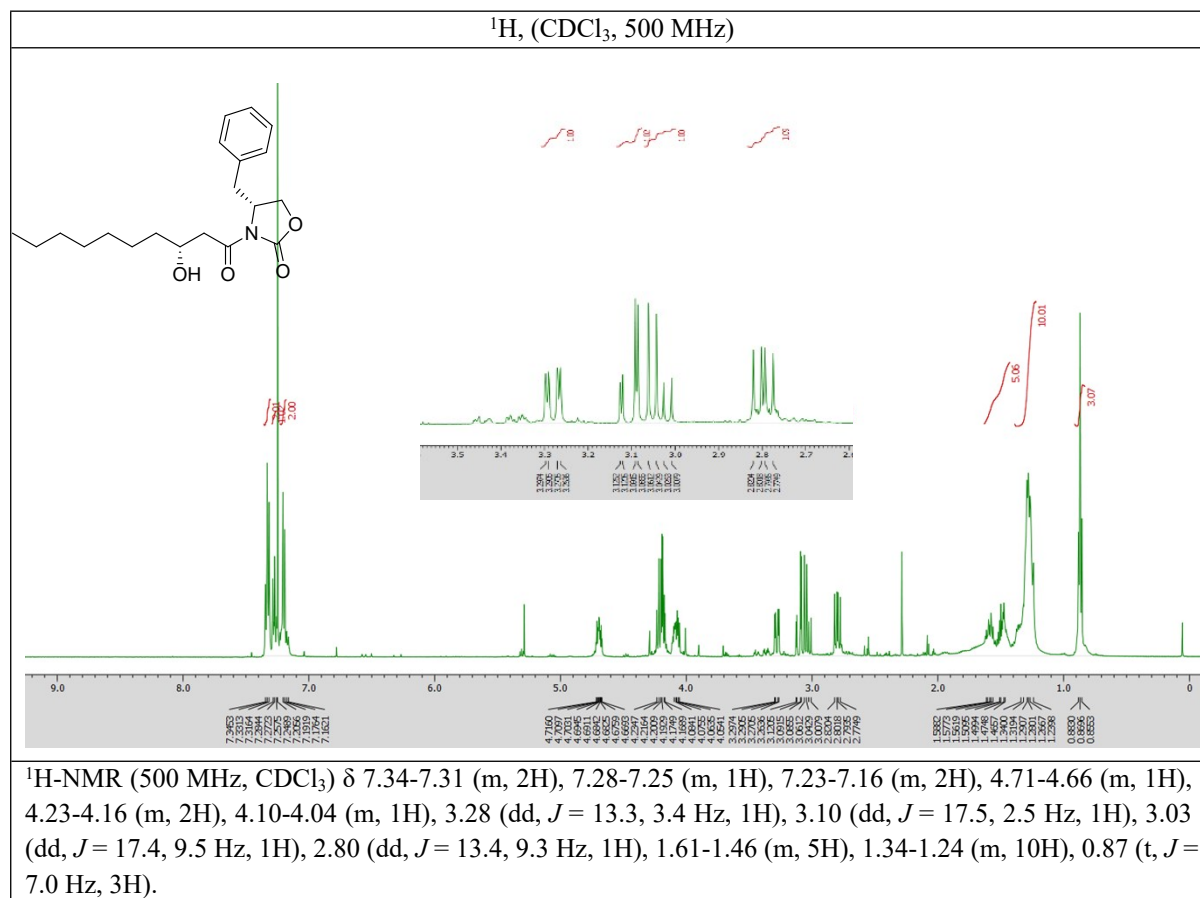

*(S)*-3-hydroxydecanoic acid (**2a**)

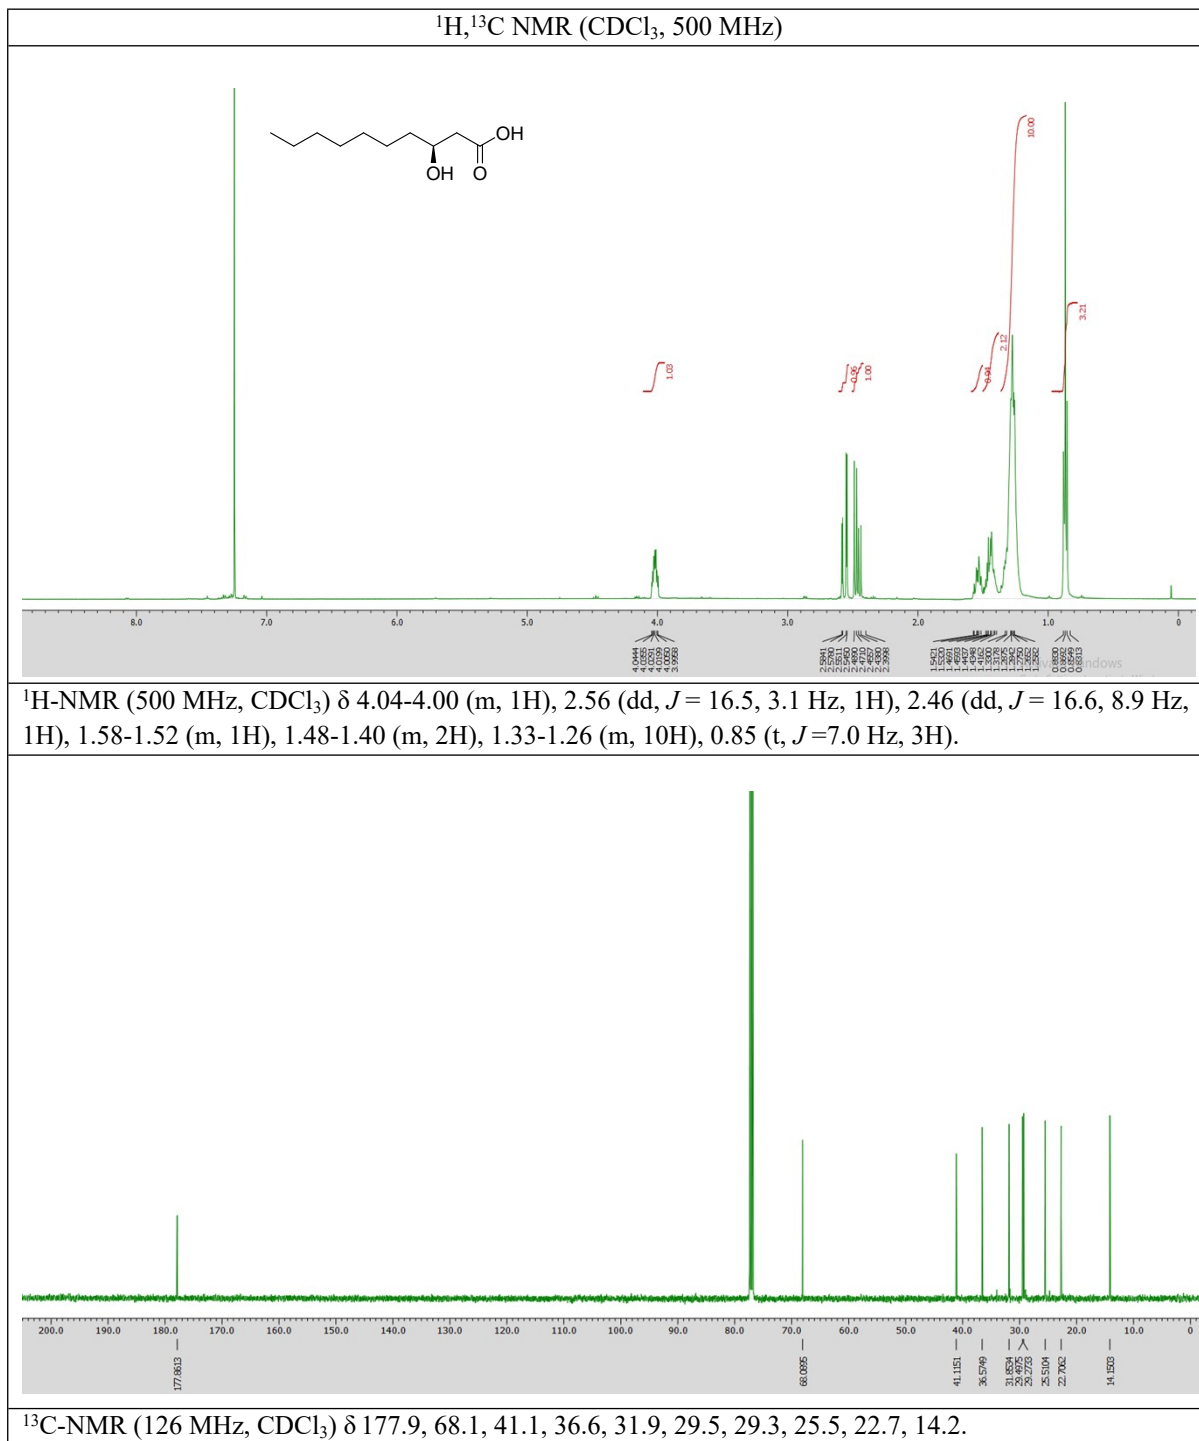

**(S)-methyl 2-hydroxy-3-methylbutanoate (11)**

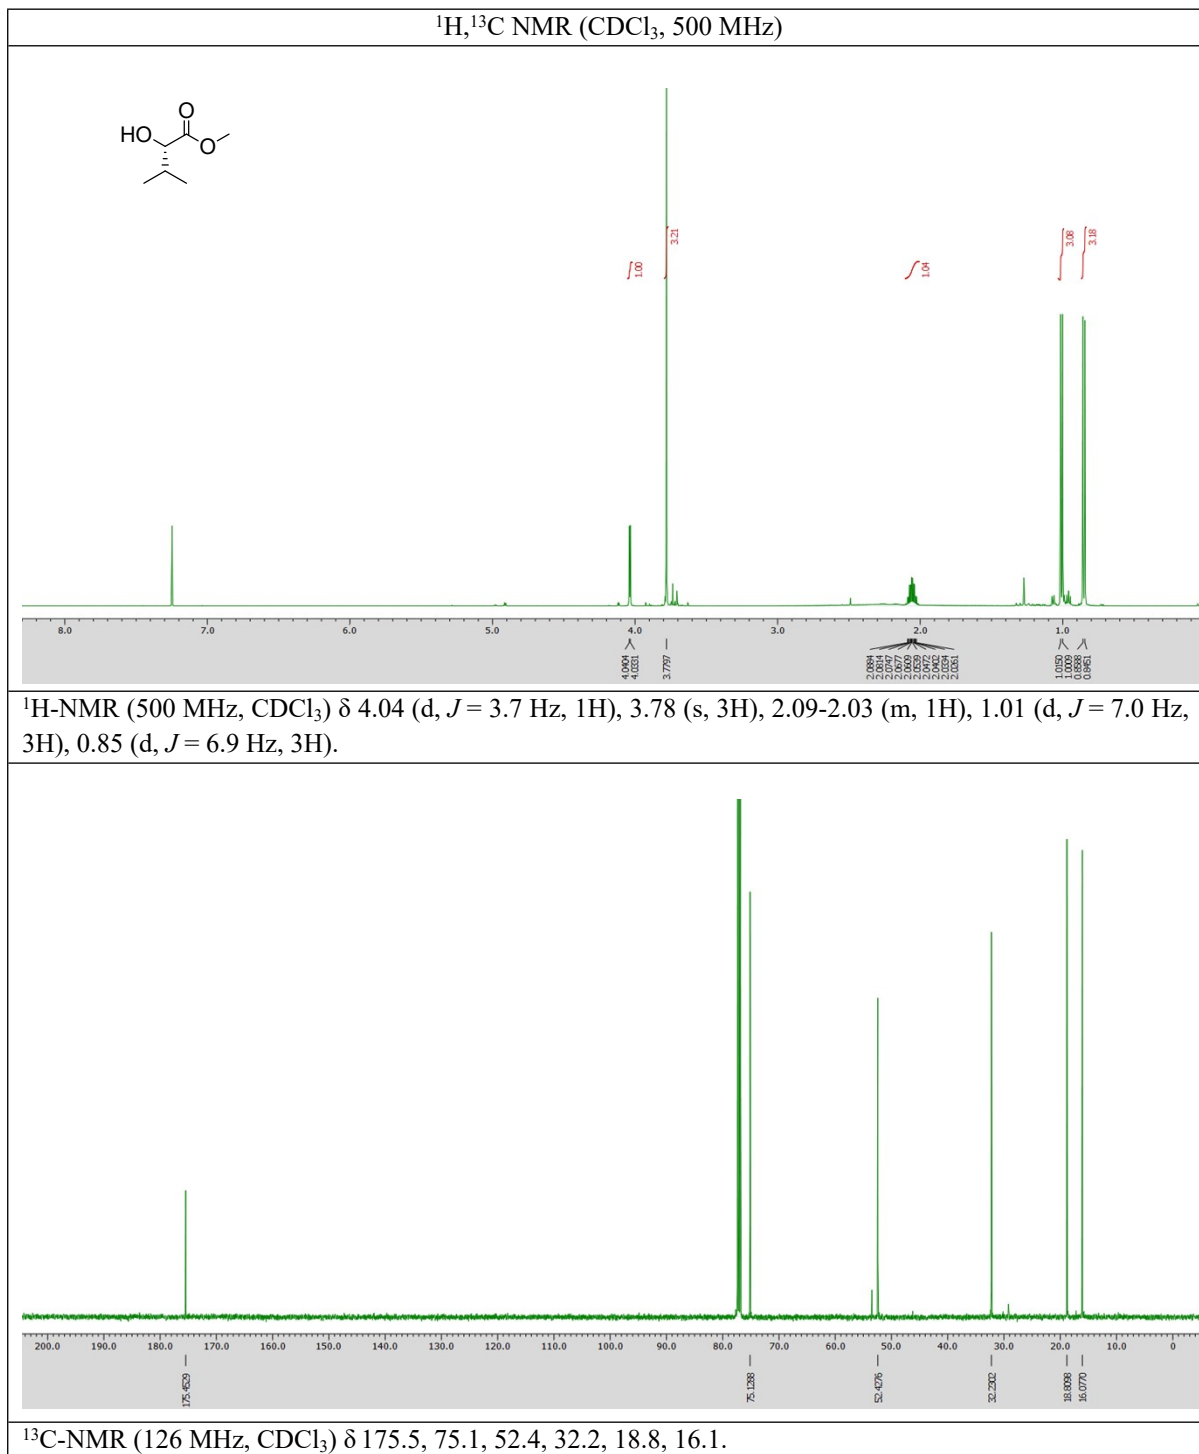



**(S)-methyl 2-((tert-butyldimethylsilyl)oxy)-3-methylbutanoate (12)**

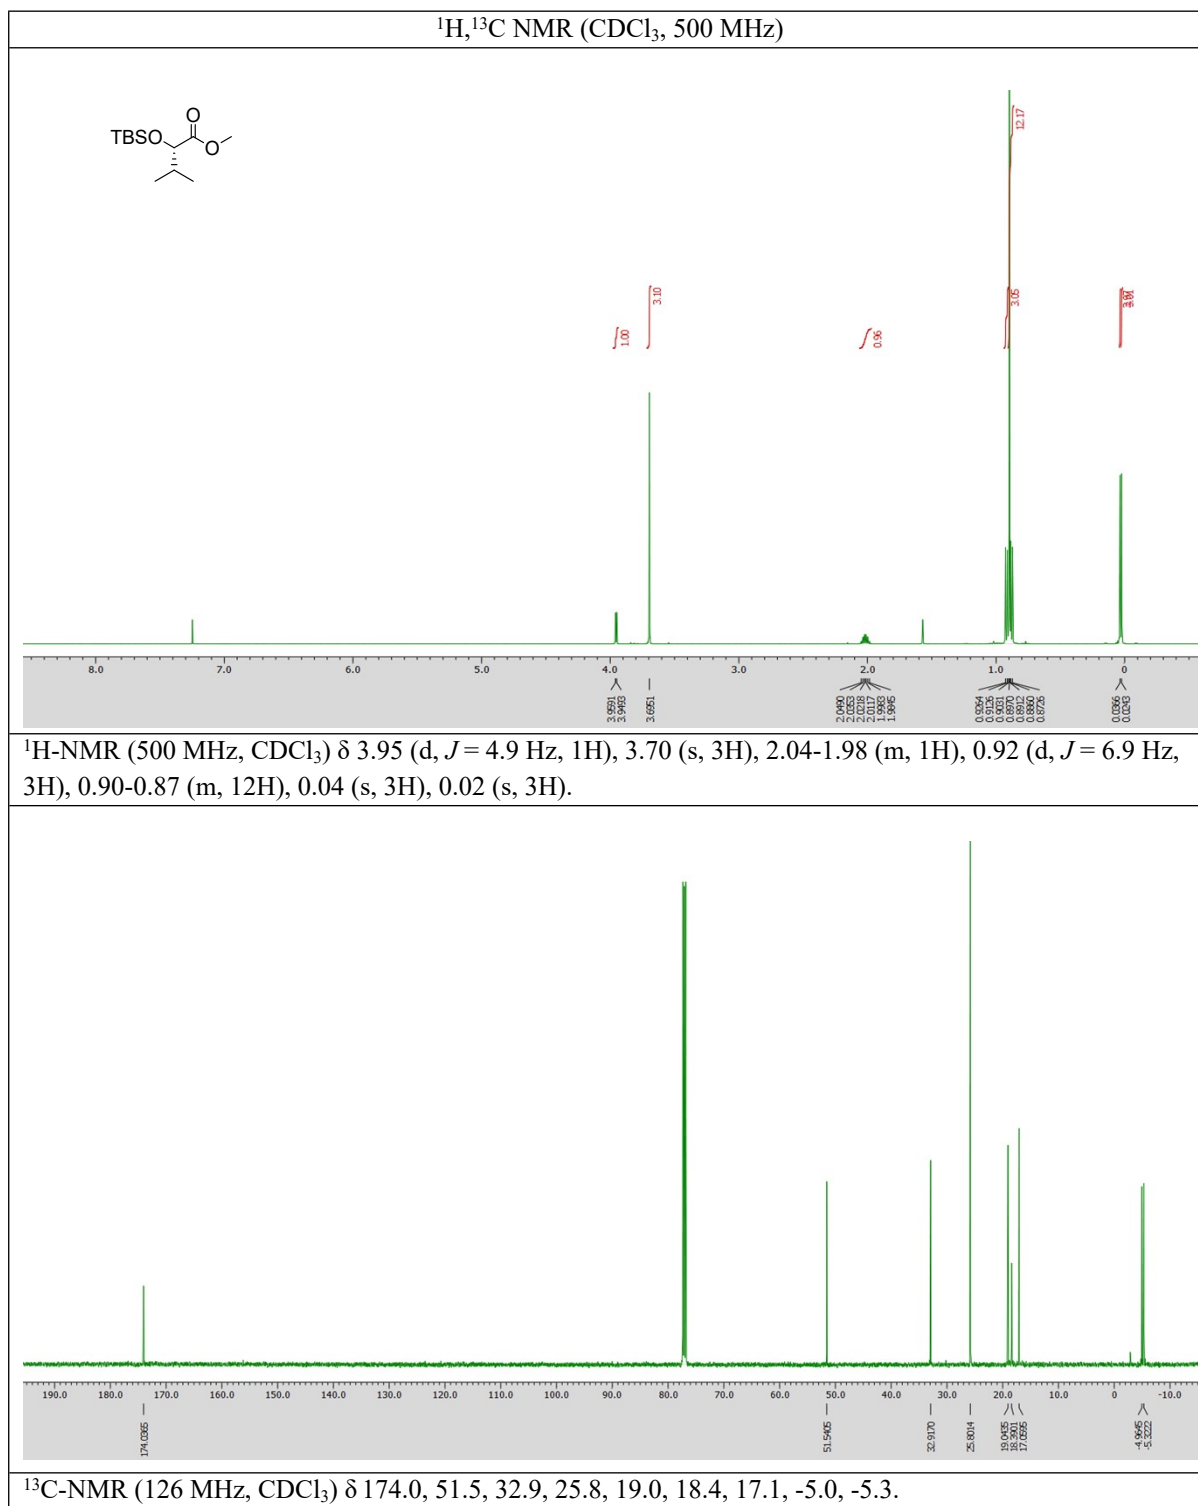

**(S)-2-((tert-butyltrimethylsilyl)oxy)-3-methylbutanoic acid (13)**

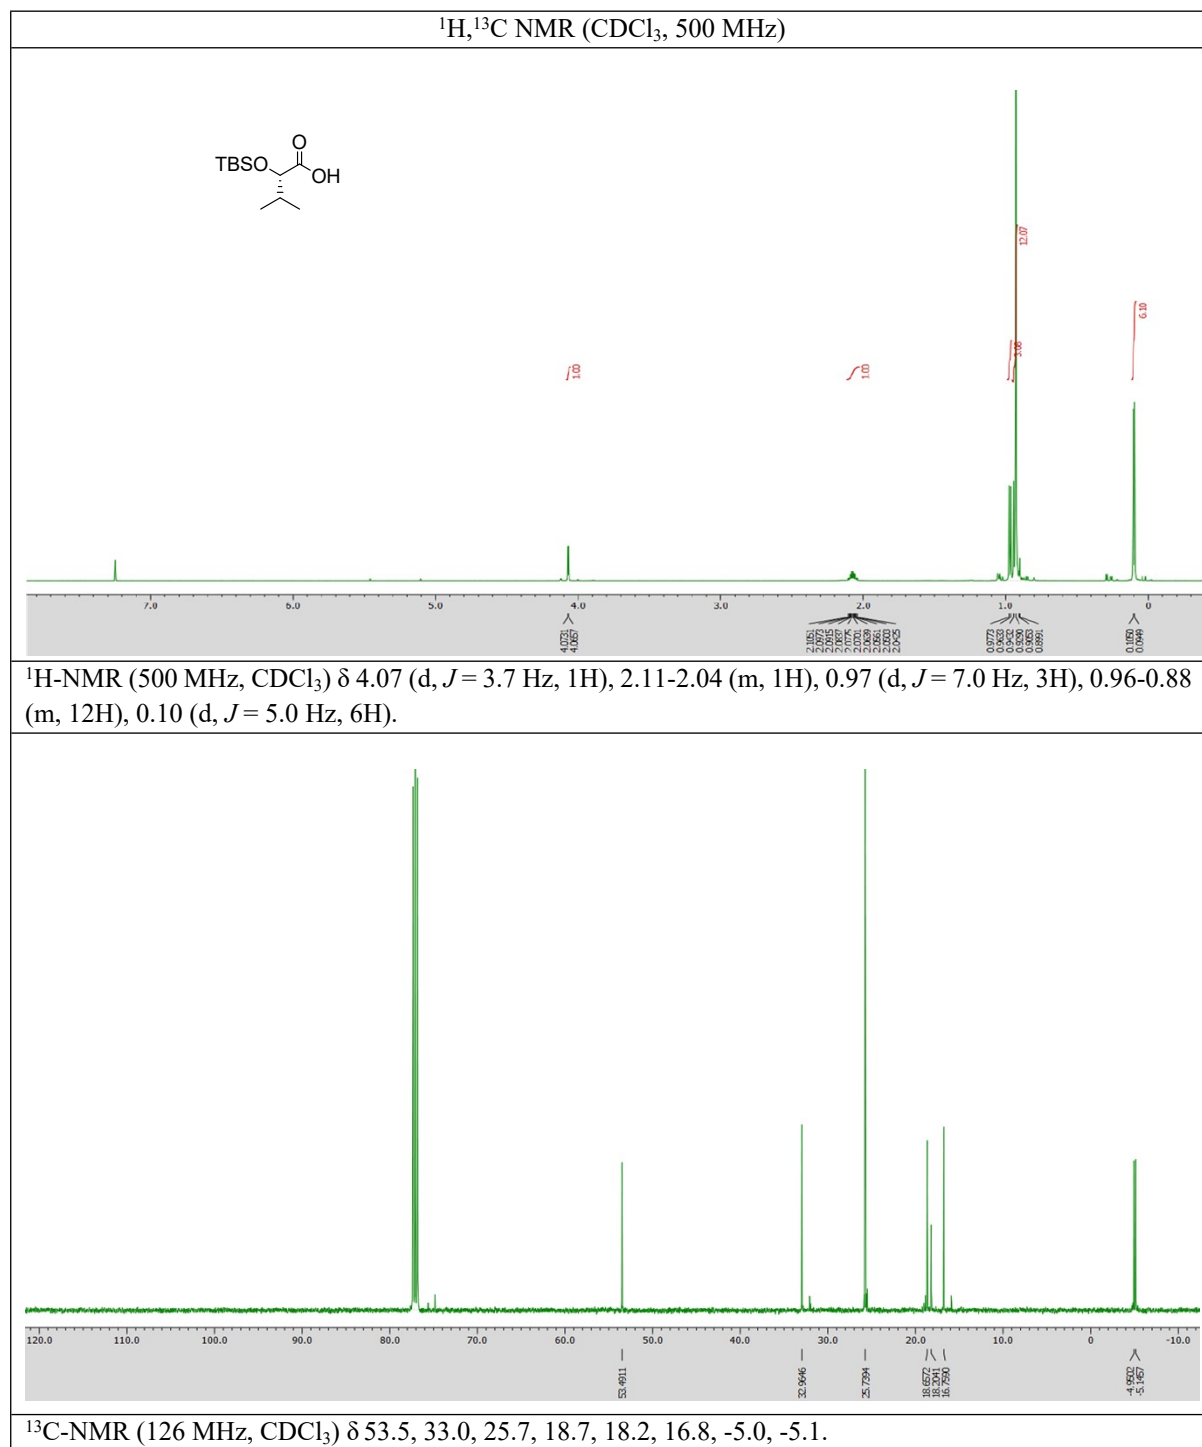

**(S)-4-nitrophenyl 2-((tert-butyldimethylsilyl)oxy)-3-methylbutanoate (14)**

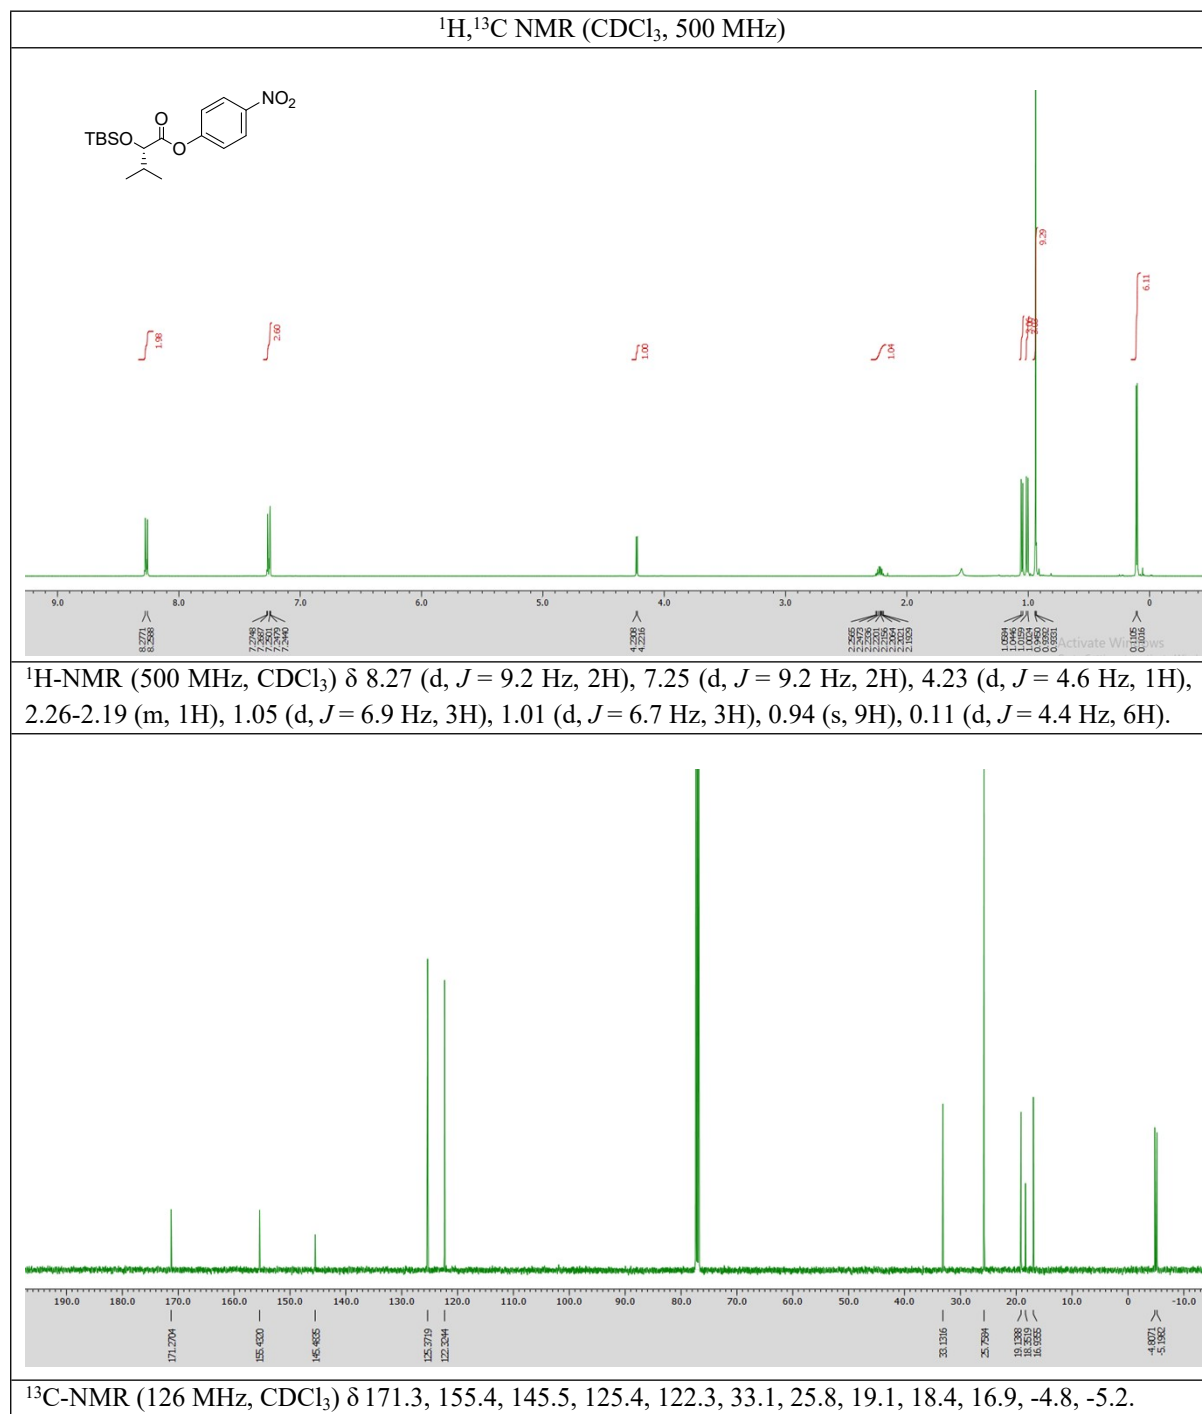

**(S)-tert-butyl 2-isopropyl-3-methoxy-5-oxo-2,5-dihydro-1H-pyrrole-1-carboxylate (6b)**

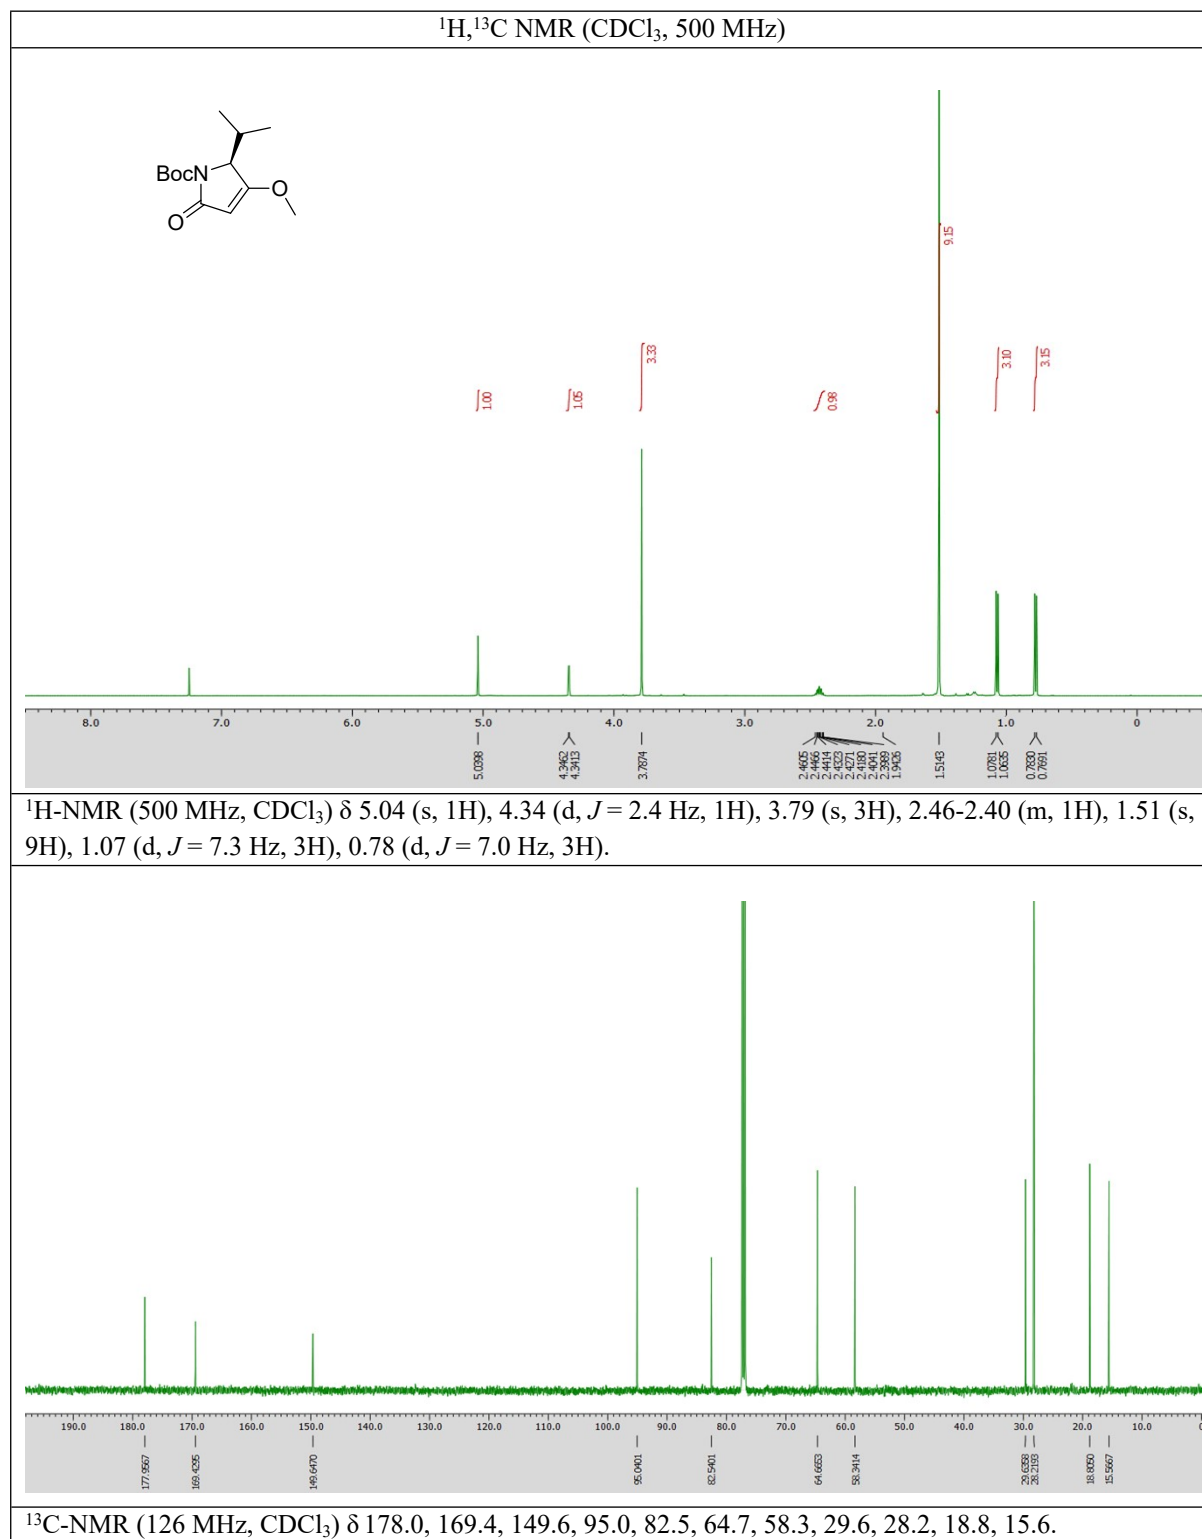

**(S)-5-isopropyl-4-methoxy-1H-pyrrol-2(5H)-one (6)**

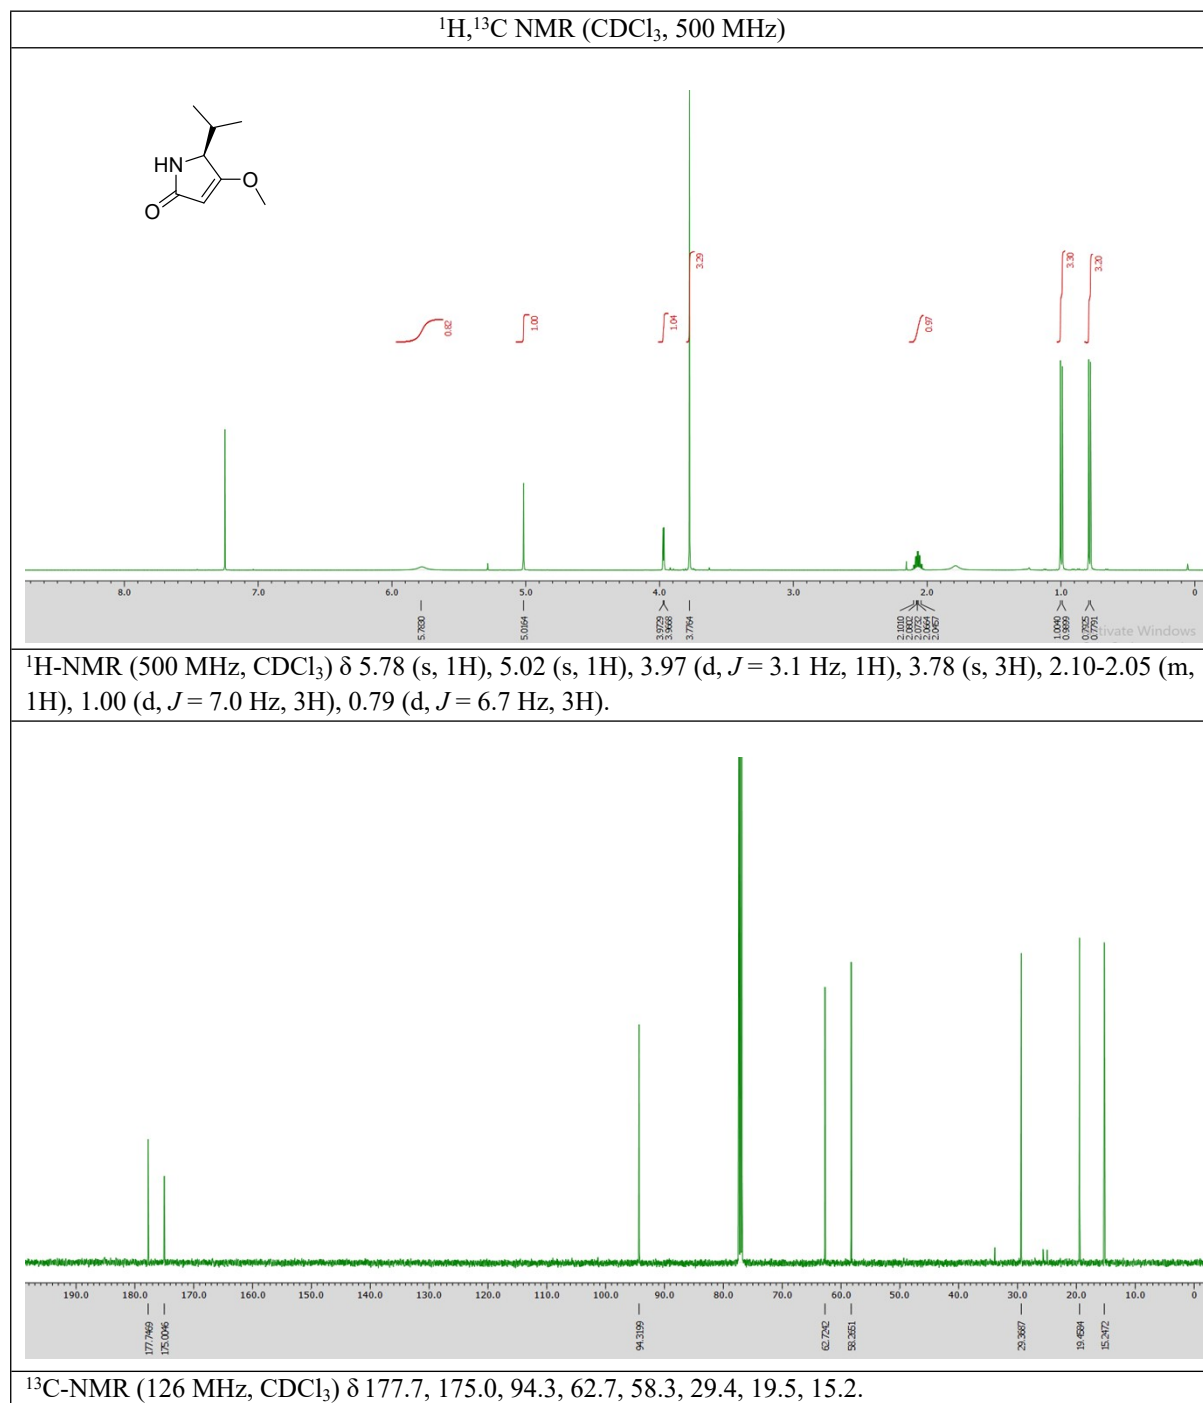

*(S)*-1-((*S*)-2-((*tert*-butyldimethylsilyl)oxy)-3-methylbutanoyl)-5-isopropyl-4-methoxy-1*H*-pyrrol-2(5*H*)-one (15)

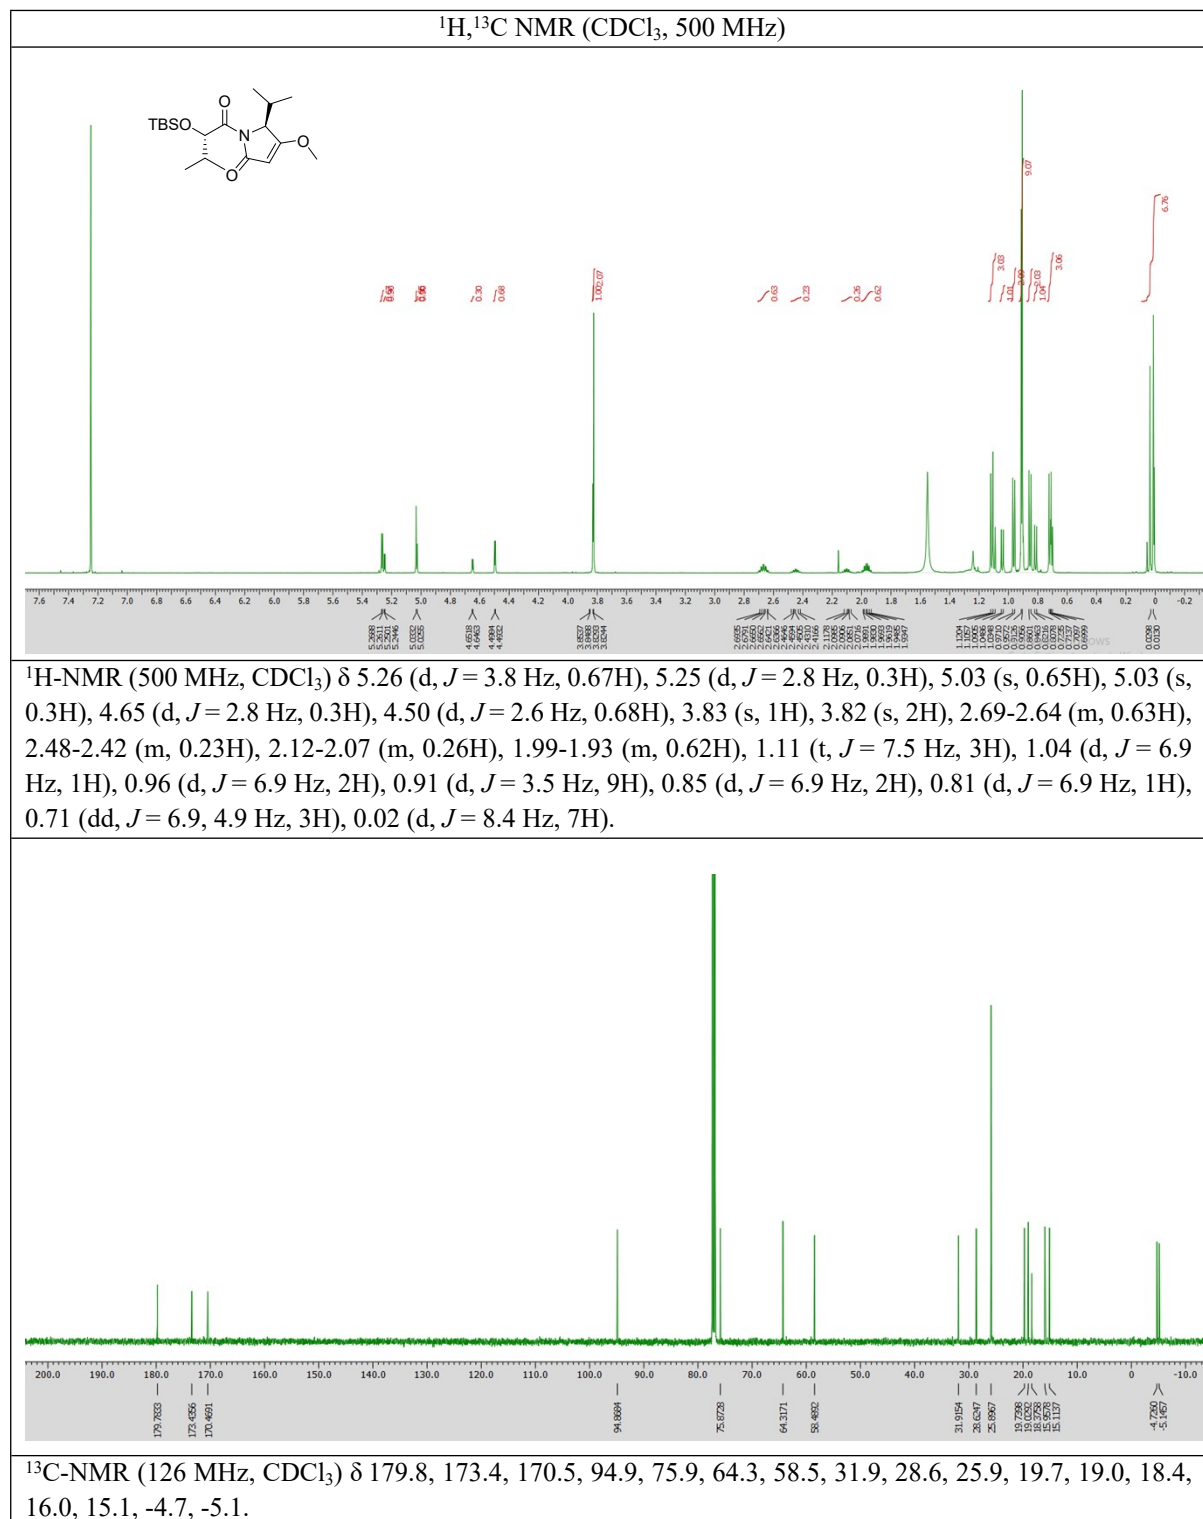

***(S)*-1-((*S*)-2-hydroxy-3-methylbutanoyl)-5-isopropyl-4-methoxy-1*H*-pyrrol-2(5*H*)-one (16)**

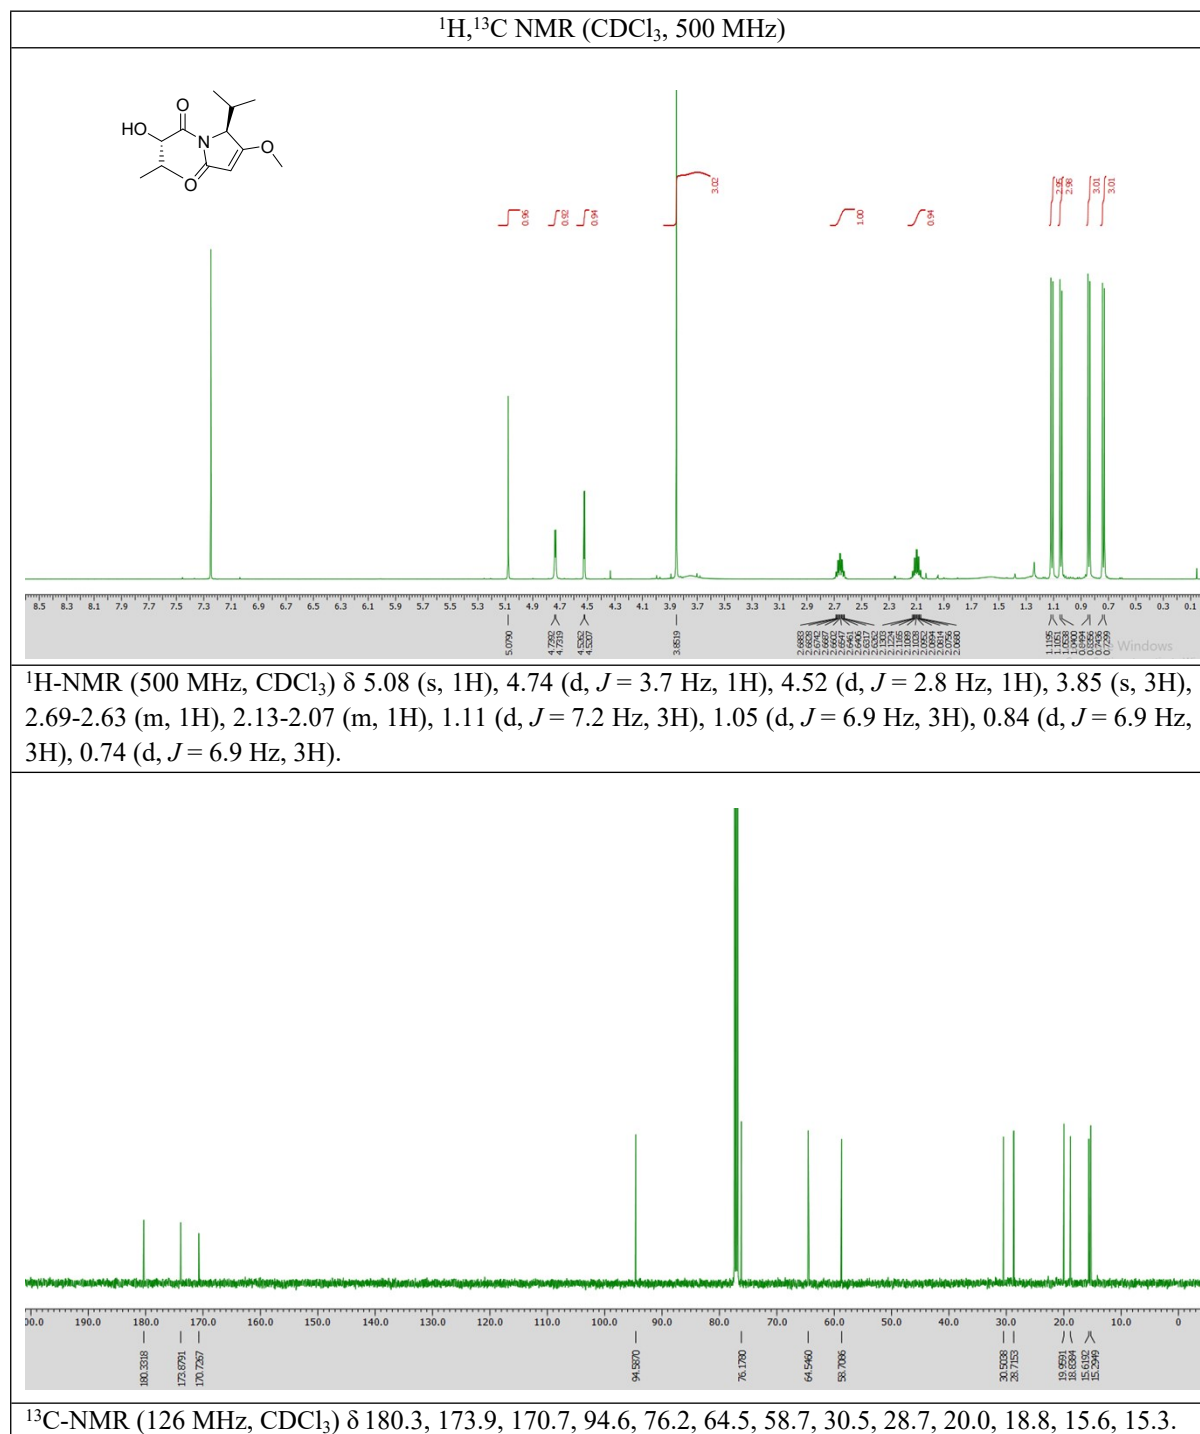

**(S)-2-((tert-butoxycarbonyl)(methyl)amino)propanoic acid (17)**

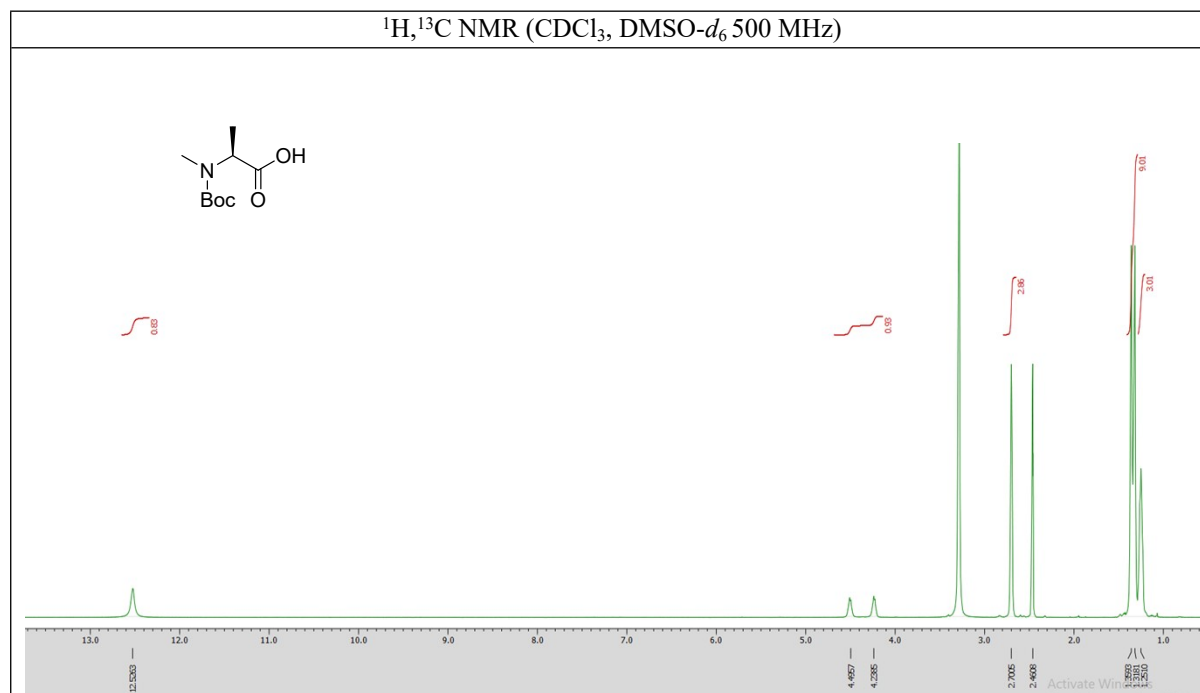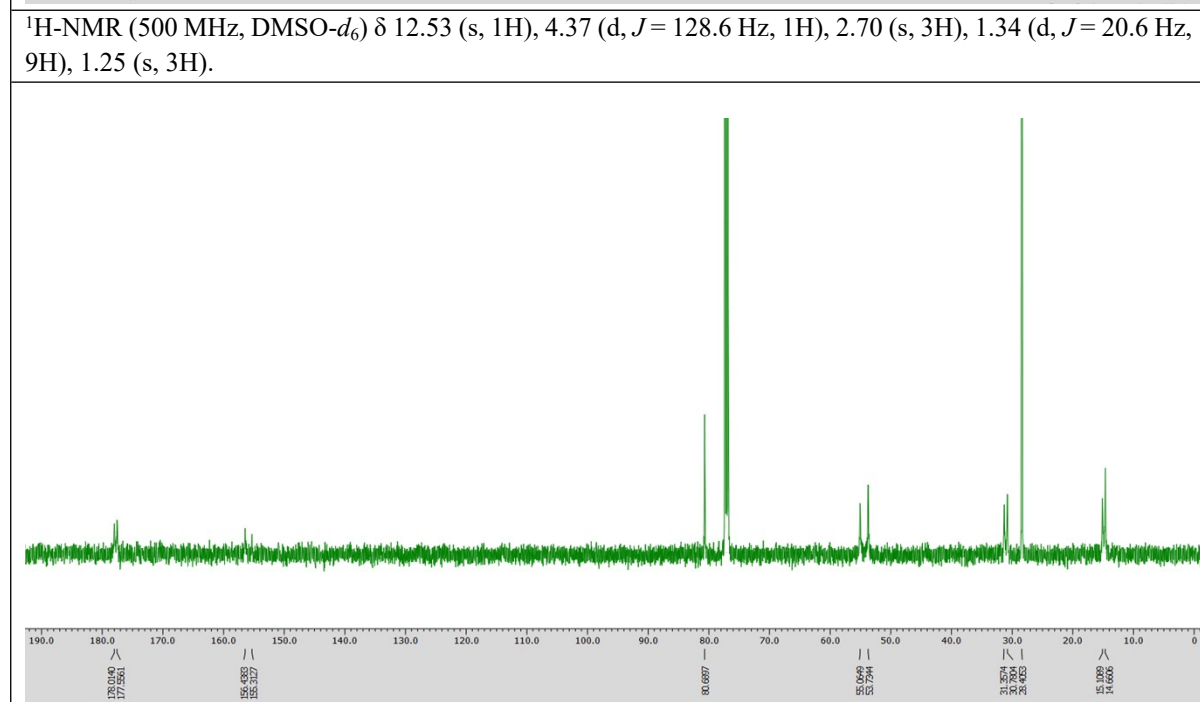



**(S)-(S)-1-((S)-2-isopropyl-3-methoxy-5-oxo-2,5-dihydro-1H-pyrrol-1-yl)-3-methyl-1-oxobutan-2-yl 2-((tert-butoxycarbonyl)(methyl)amino)propanoate (18)**

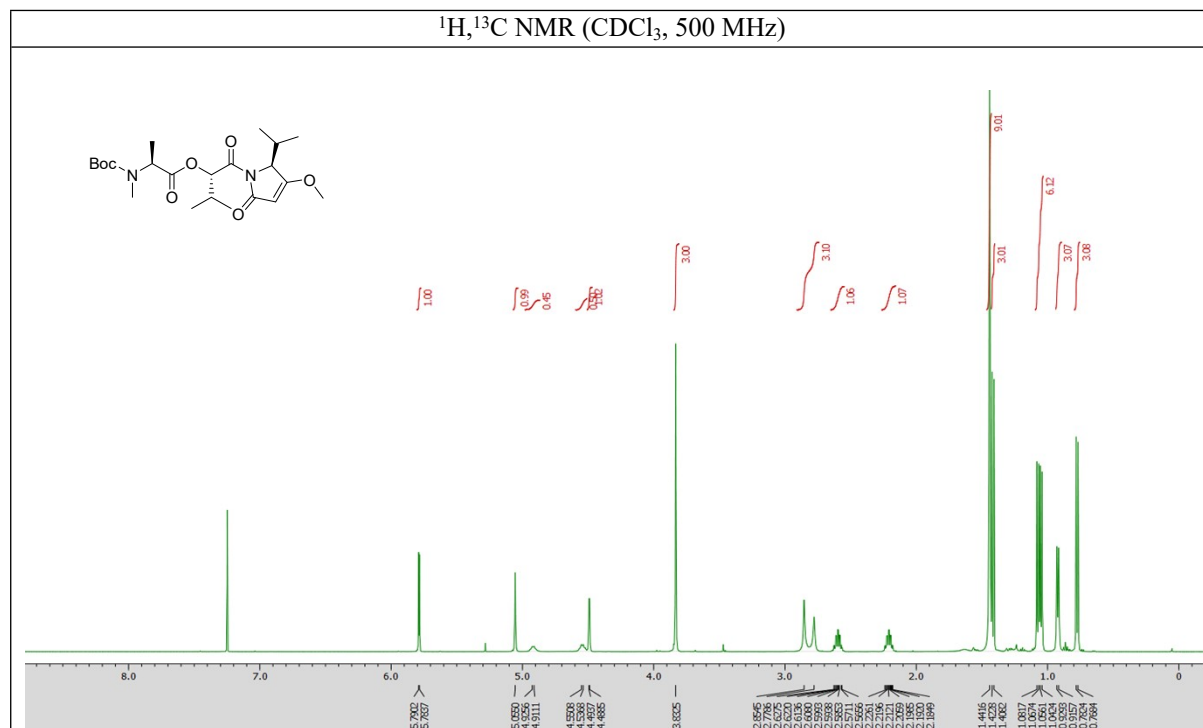

$^1\text{H}$ -NMR (500 MHz,  $\text{CDCl}_3$ )  $\delta$  5.79 (d,  $J$  = 3.2 Hz, 1H), 5.06 (s, 1H), 4.92-4.54 (m, 1H), 4.49 (d,  $J$  = 2.6 Hz, 1H), 3.83 (s, 3H), 2.82 (d,  $J$  = 38.0 Hz, 3H), 2.63-2.57 (m, 1H), 2.24-2.18 (m, 1H), 1.44 (s, 9H), 1.42 (d,  $J$  = 7.3 Hz, 3H), 1.06 (dd,  $J$  = 12.7, 7.0 Hz, 6H), 0.92 (d,  $J$  = 6.8 Hz, 3H), 0.78 (d,  $J$  = 7.0 Hz, 3H).

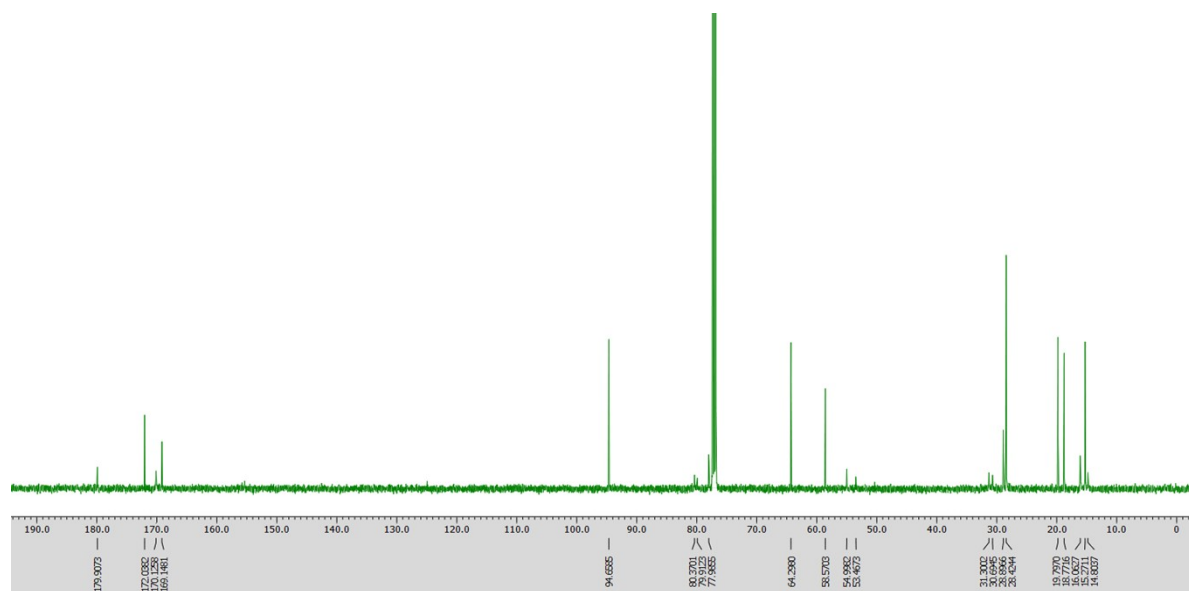

$^{13}\text{C}$ -NMR (126 MHz,  $\text{CDCl}_3$ )  $\delta$  179.9, 172.0, 170.1, 169.1, 94.7, 78.0, 64.3, 58.6, 55.0, 53.5, 31.3, 30.7, 28.9, 28.4, 19.8, 18.8, 16.1, 15.3, 14.8.

**(S)-(S)-1-((S)-2-isopropyl-3-methoxy-5-oxo-2,5-dihydro-1H-pyrrol-1-yl)-3-methyl-1-oxobutan-2-yl 2-((S)-2-((tert-butoxycarbonyl)amino)-N,3-dimethylbutanamido)propanoate (3)**

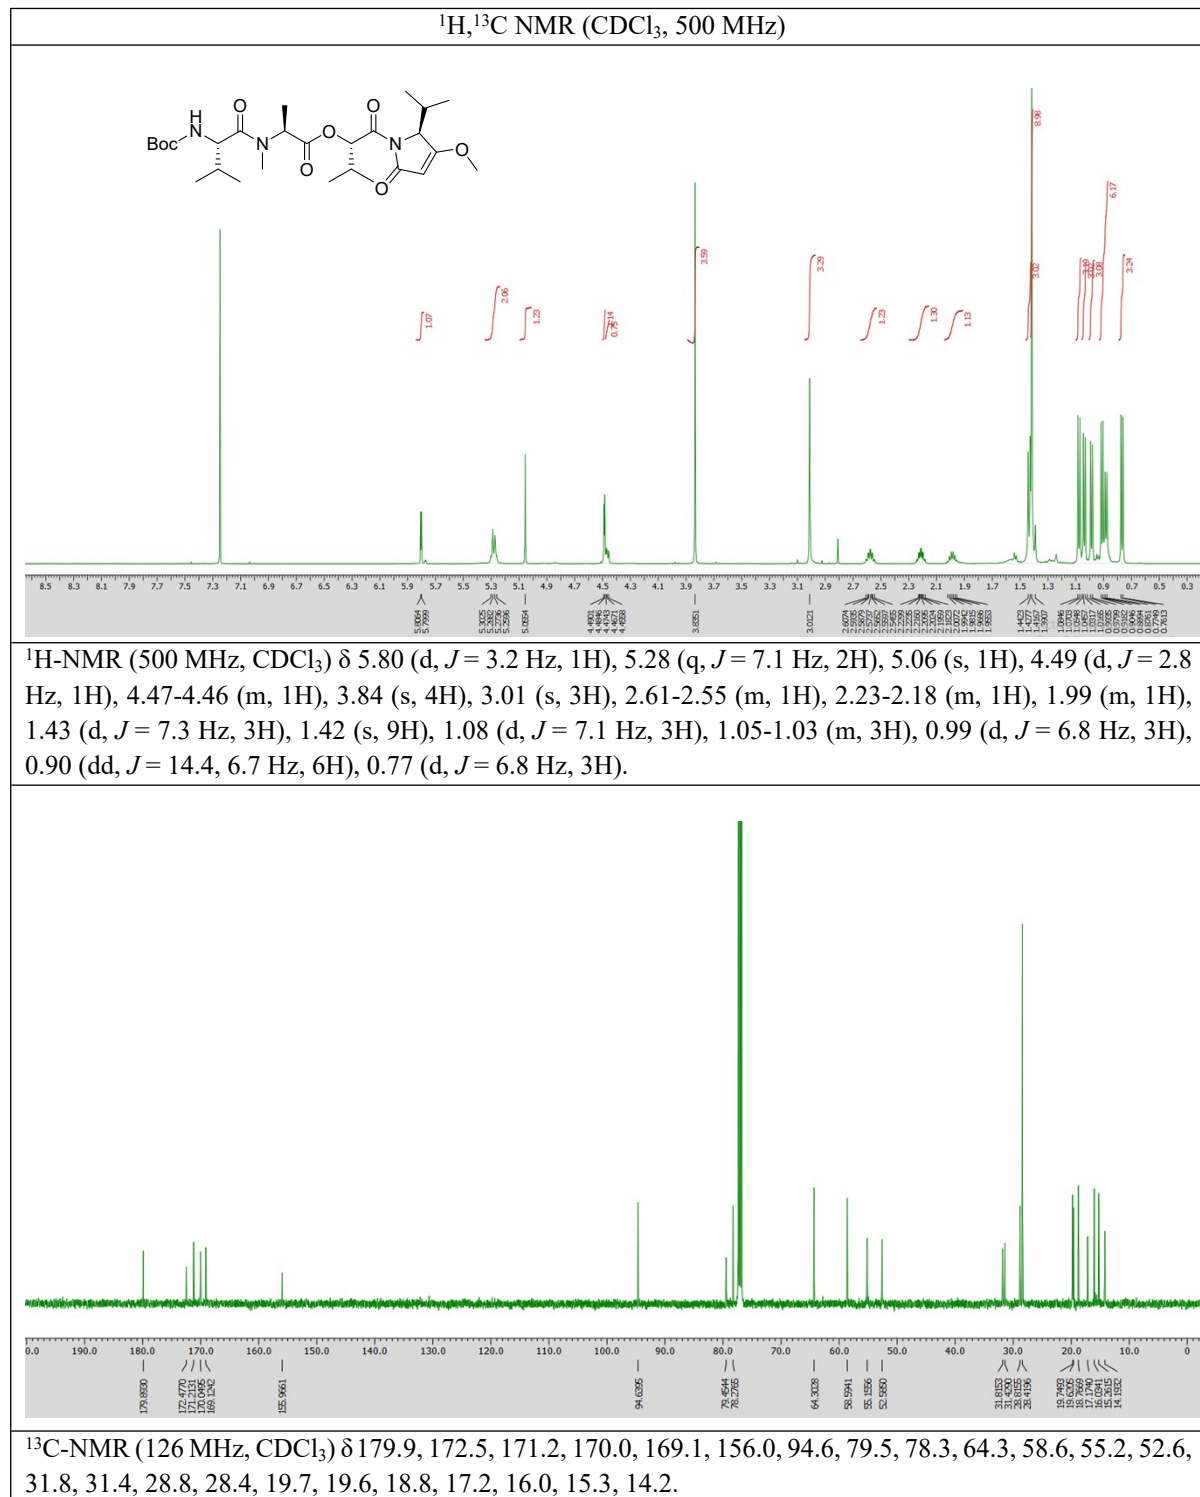

*(S)-(S)-1-((S)-2-isopropyl-3-methoxy-5-oxo-2,5-dihydro-1H-pyrrol-1-yl)-3-methyl-1-oxobutan-2-yl 2-((S)-2-((S)-3-hydroxydecanamido)-N,3-dimethylbutanamido)propanoate (1a)*

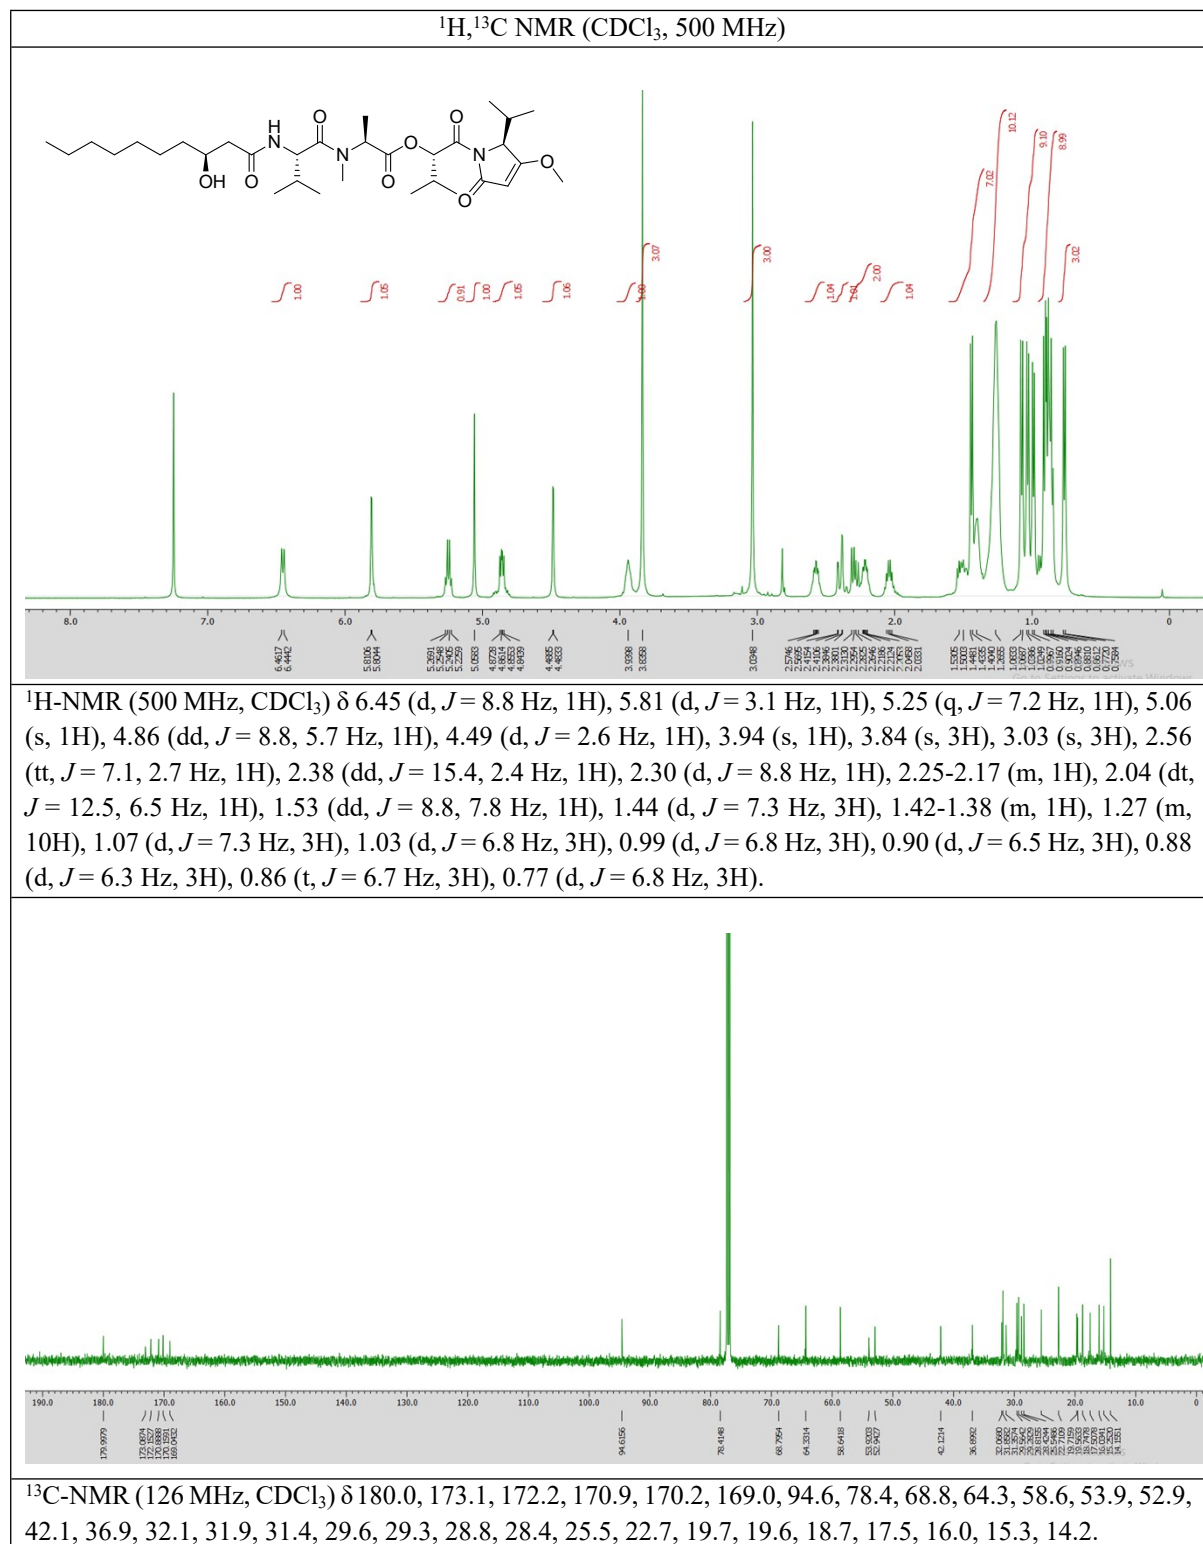

**(R)-4-benzyl-3-((S)-3-hydroxyoctanoyl)oxazolidine-2-one (9b)**

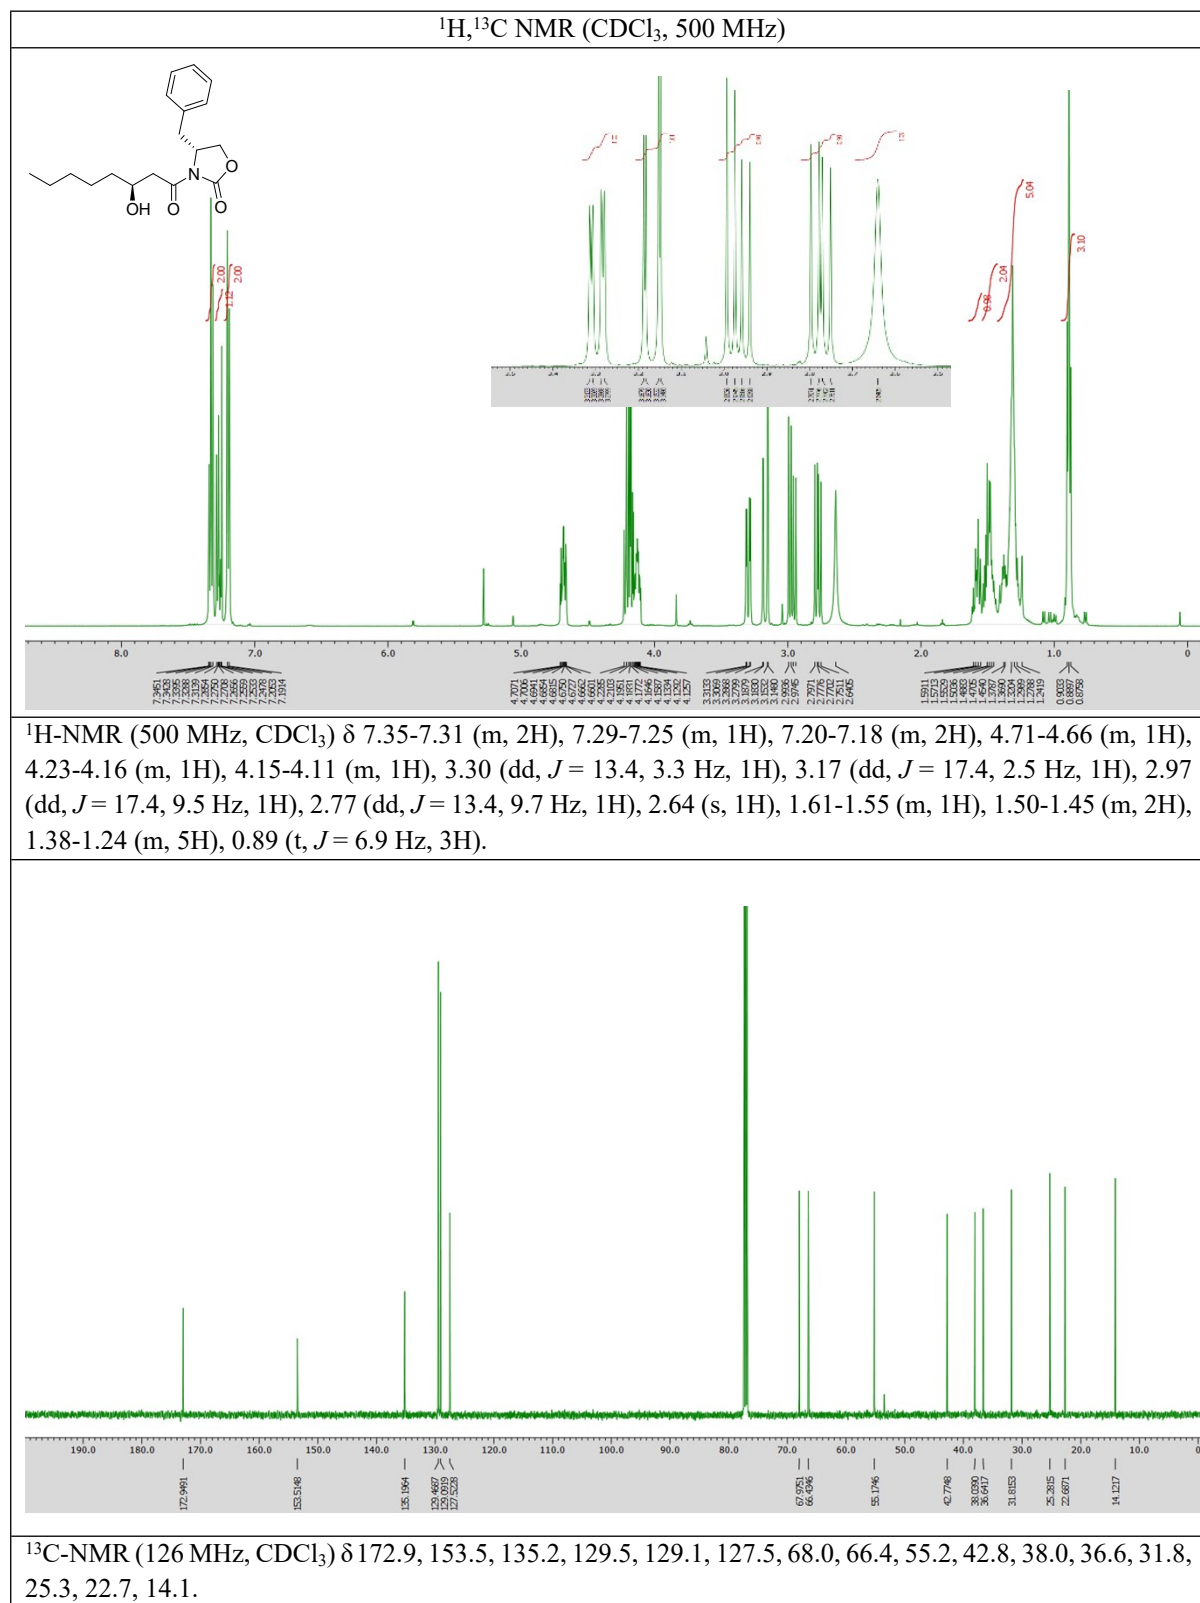

**(R)-4-benzyl-3-((R)-3-hydroxydecanoyl)oxazolidine-2-one(9bb)**

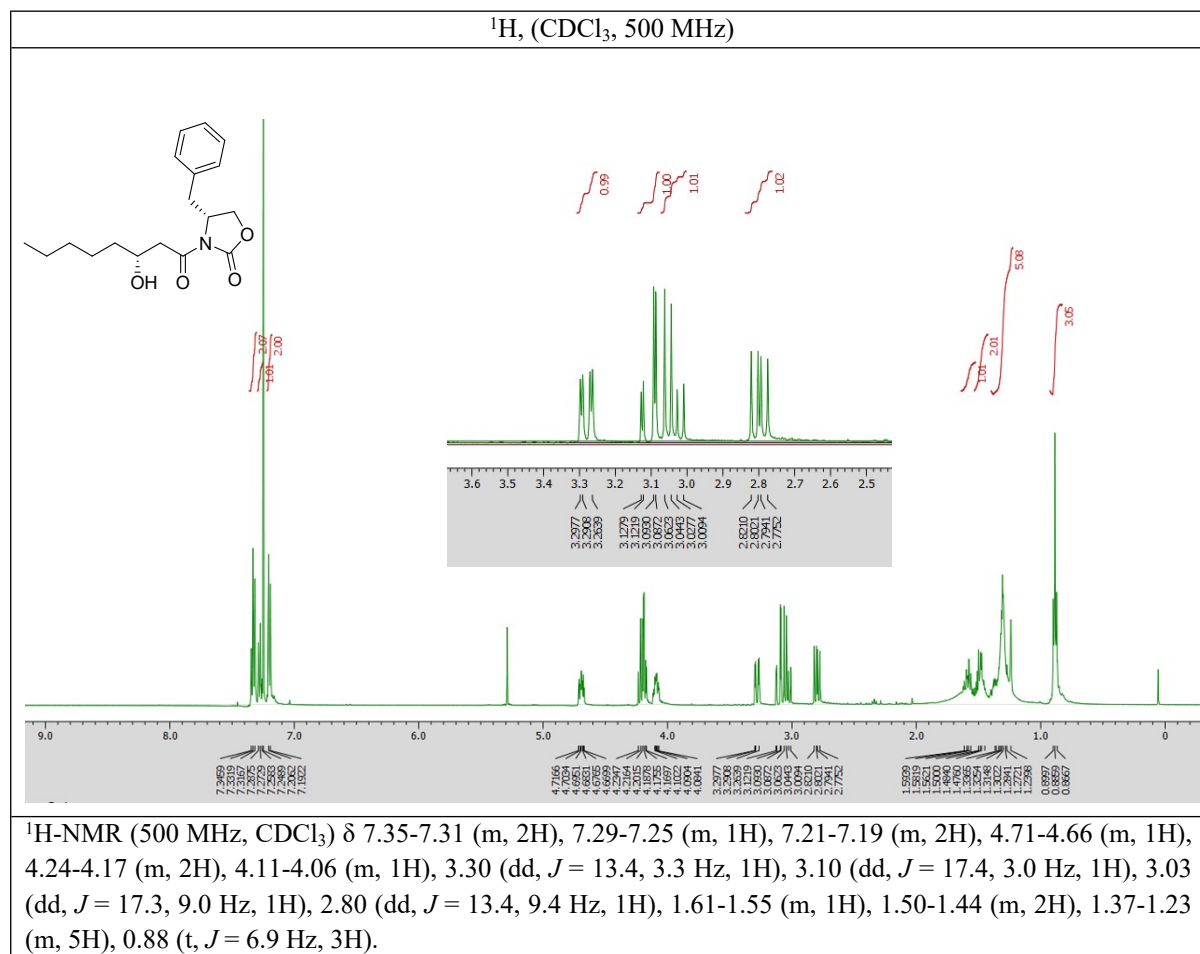

**(S)-3-hydroxyoctanoic acid (2b)**

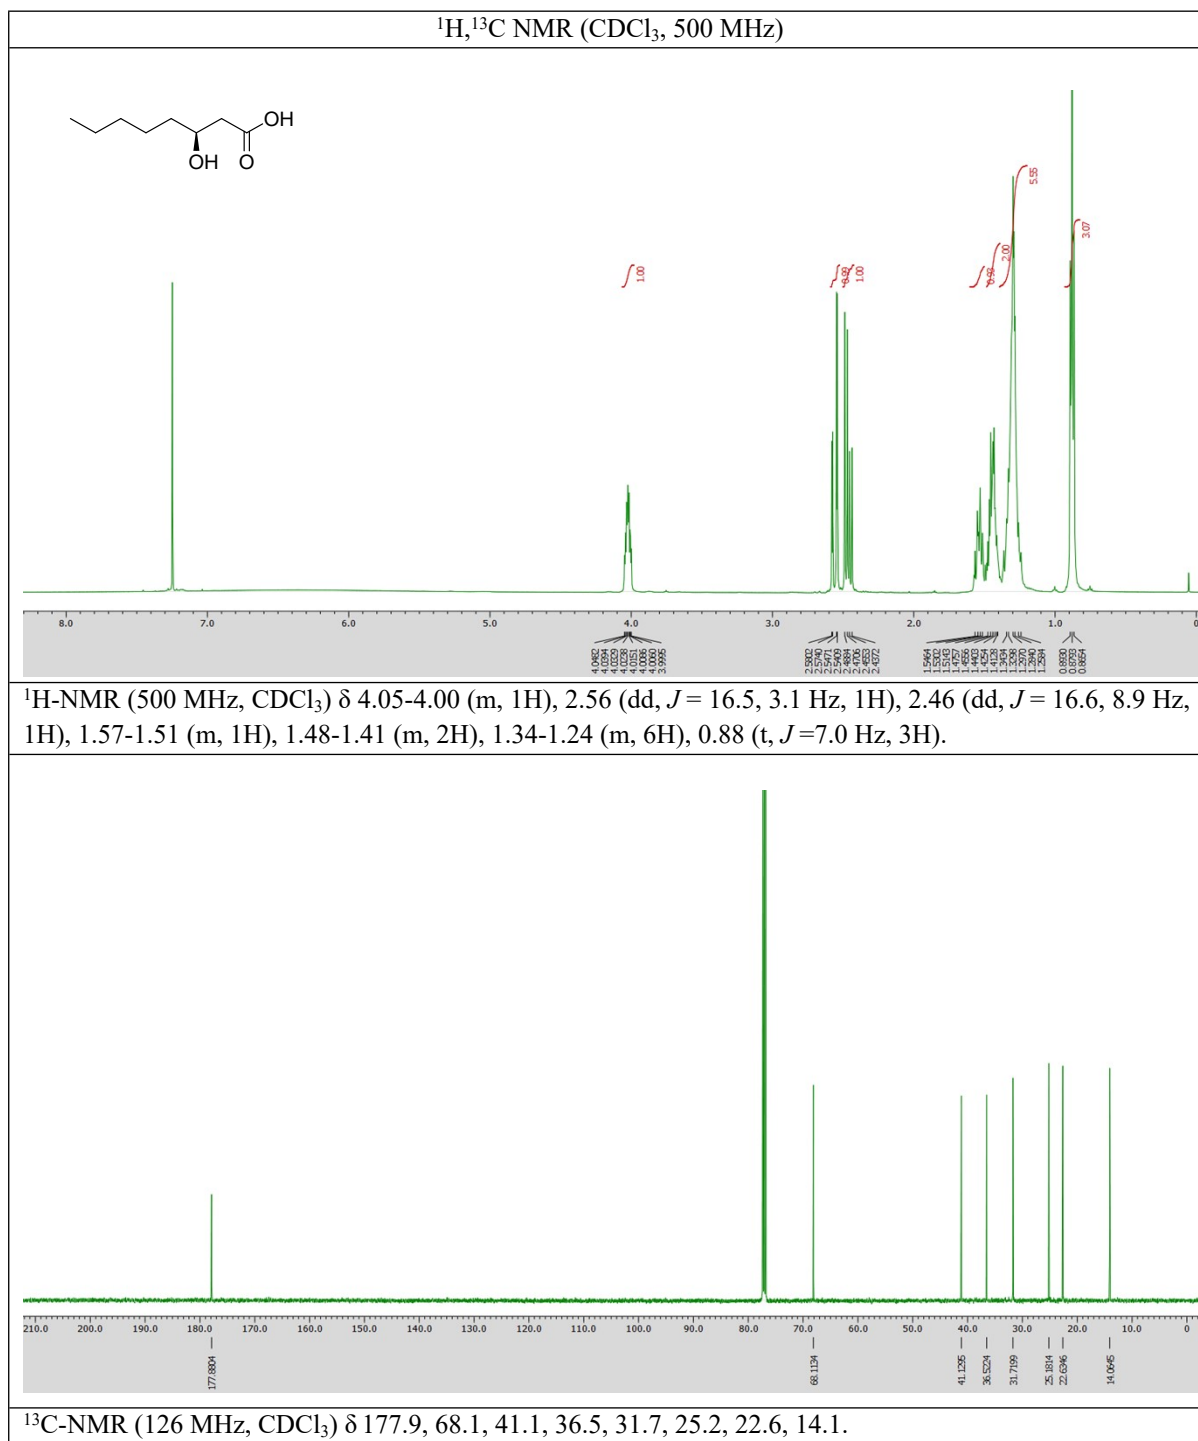

**(S)-(S)-1-((S)-2-isopropyl-3-methoxy-5-oxo-2,5-dihydro-1H-pyrrol-1-yl)-3-methyl-1-oxobutan-2-yl 2-((S)-2-((S)-3-hydroxyoctanamido)-N,3-dimethylbutanamido)propanoate (1b)**

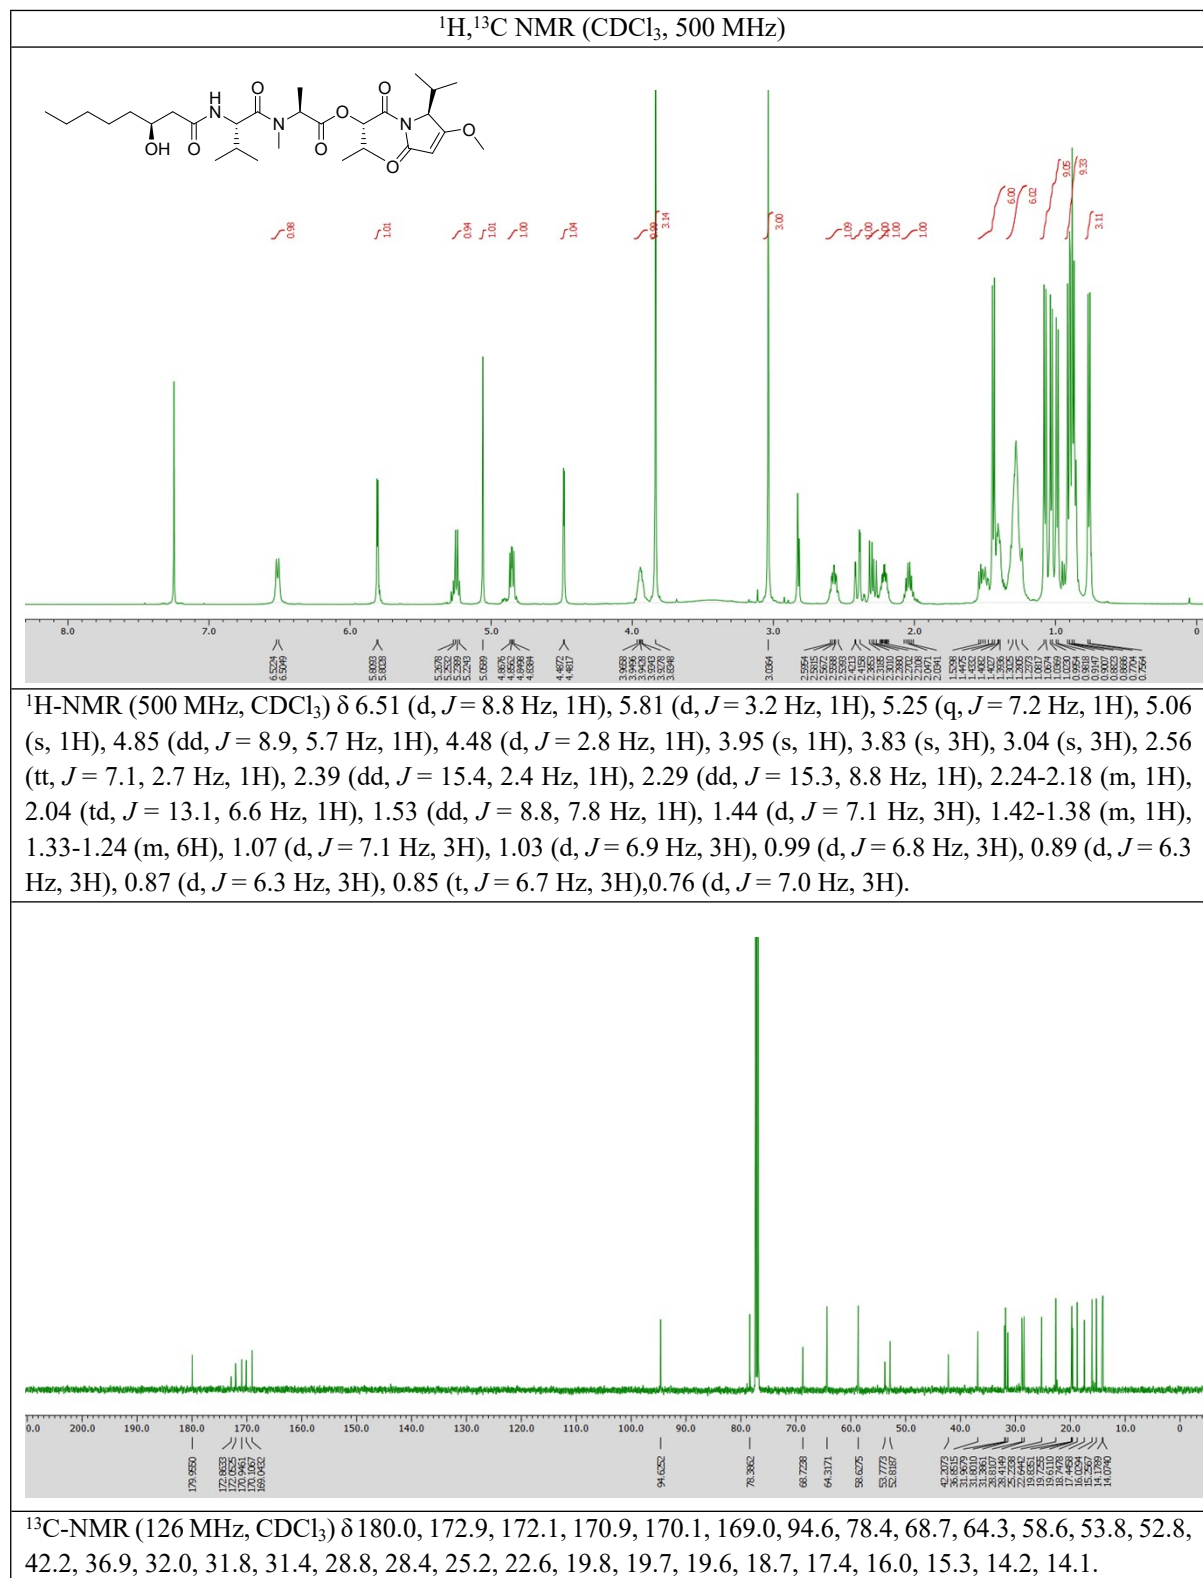

**(R)-4-benzyl-3-((S)-3-hydroxydodecanoyl)oxazolidine-2-one (9c)**

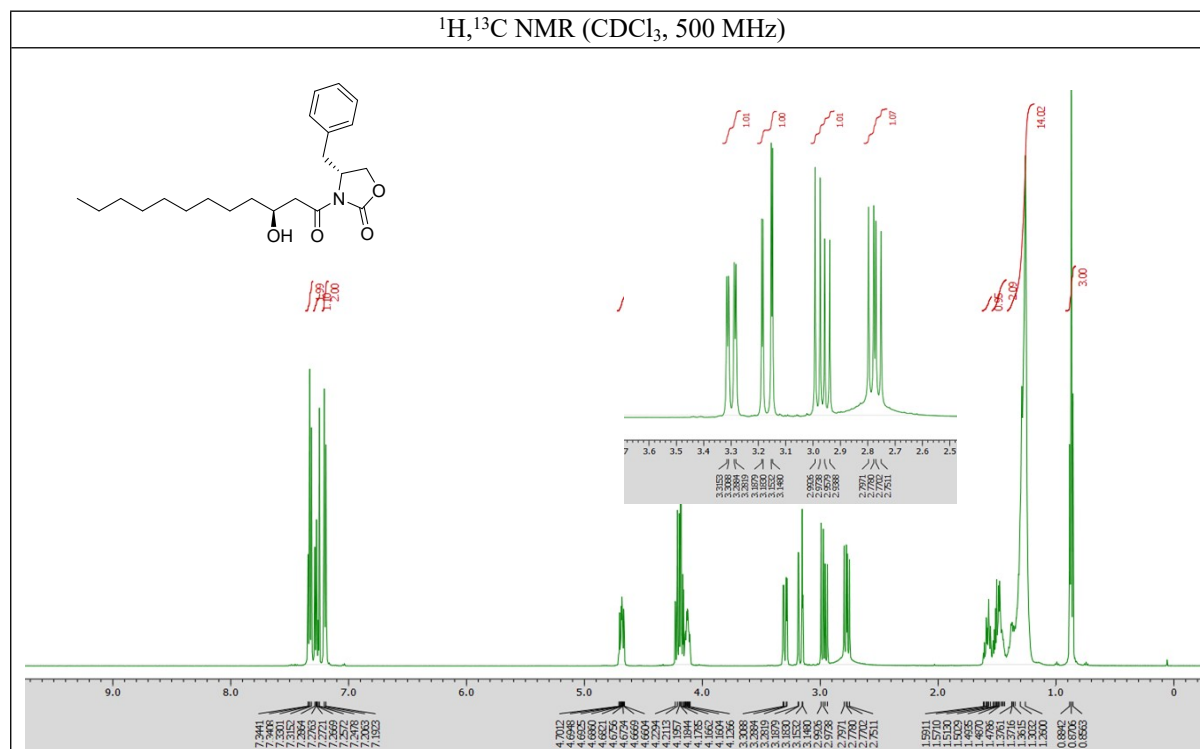

$^1\text{H}$ -NMR (500 MHz,  $\text{CDCl}_3$ )  $\delta$  7.34-7.32 (m, 2H), 7.29-7.25 (m, 1H), 7.20-7.18 (m, 2H), 4.71-4.66 (m, 1H), 4.23-4.16 (m, 2H), 4.15-4.10 (m, 1H), 3.30 (dd,  $J$  = 13.5, 3.2 Hz, 1H), 3.17 (dd,  $J$  = 17.4, 2.5 Hz, 1H), 2.97 (dd,  $J$  = 17.4, 9.5 Hz, 1H), 2.77 (dd,  $J$  = 13.5, 9.6 Hz, 1H), 1.62-1.56 (m, 1H), 1.53-1.44 (m, 2H), 1.38-1.26 (m, 14H), 0.87 (t,  $J$  = 7.0 Hz, 3H).

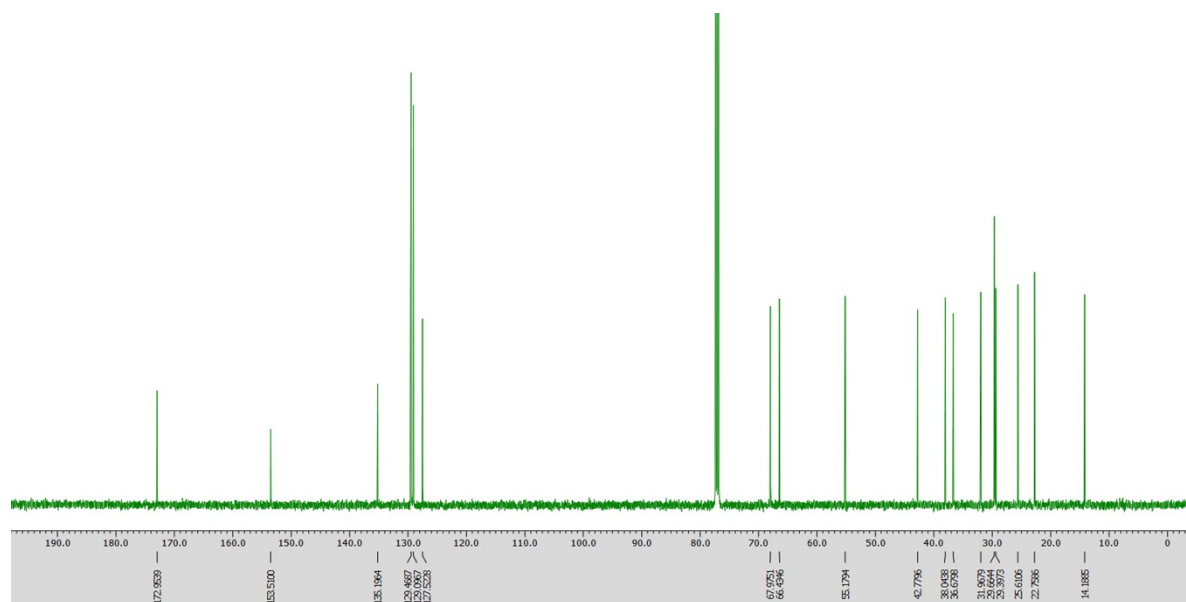

$^{13}\text{C}$ -NMR (126 MHz,  $\text{CDCl}_3$ )  $\delta$  173.0, 153.5, 135.2, 129.5, 129.1, 127.5, 68.0, 66.4, 55.2, 42.8, 38.0, 36.7, 32.0, 29.7, 29.4, 25.6, 22.8, 14.2.



**(R)-4-benzyl-3-((R)-3-hydroxydodecanoyl)oxazolidine-2-one (9cc)**

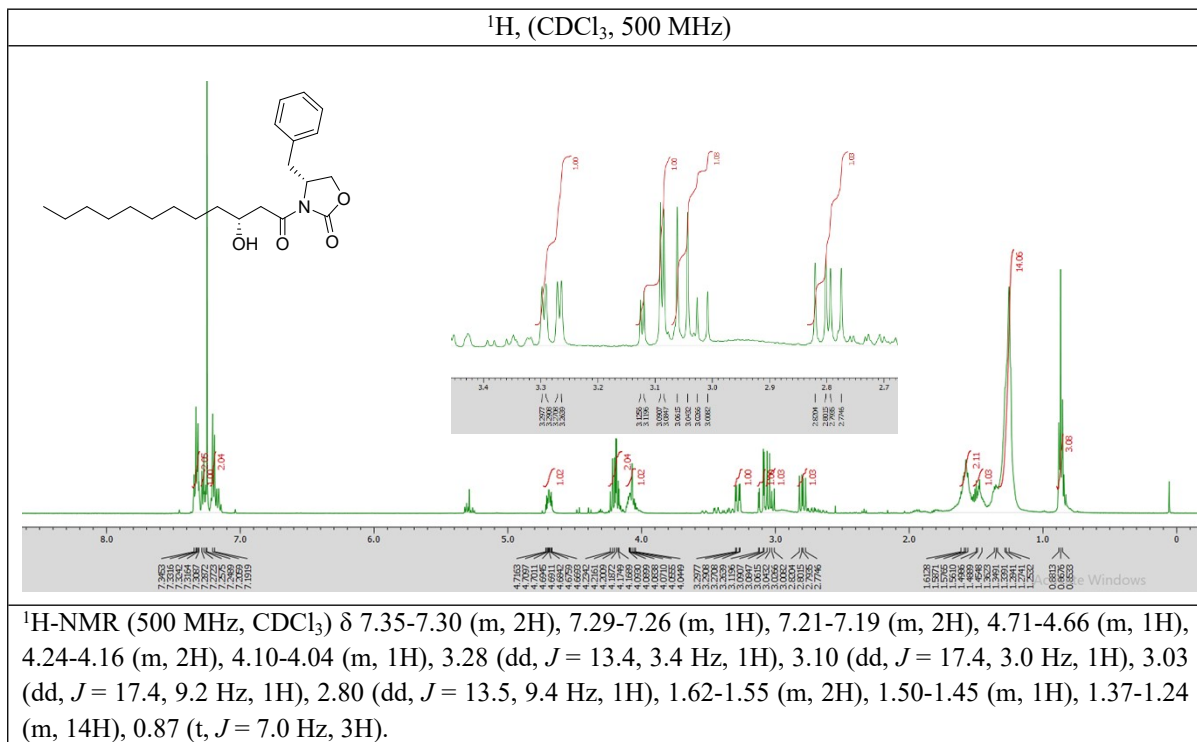

*(S)*-3-hydroxydodecanoic acid (**2c**)

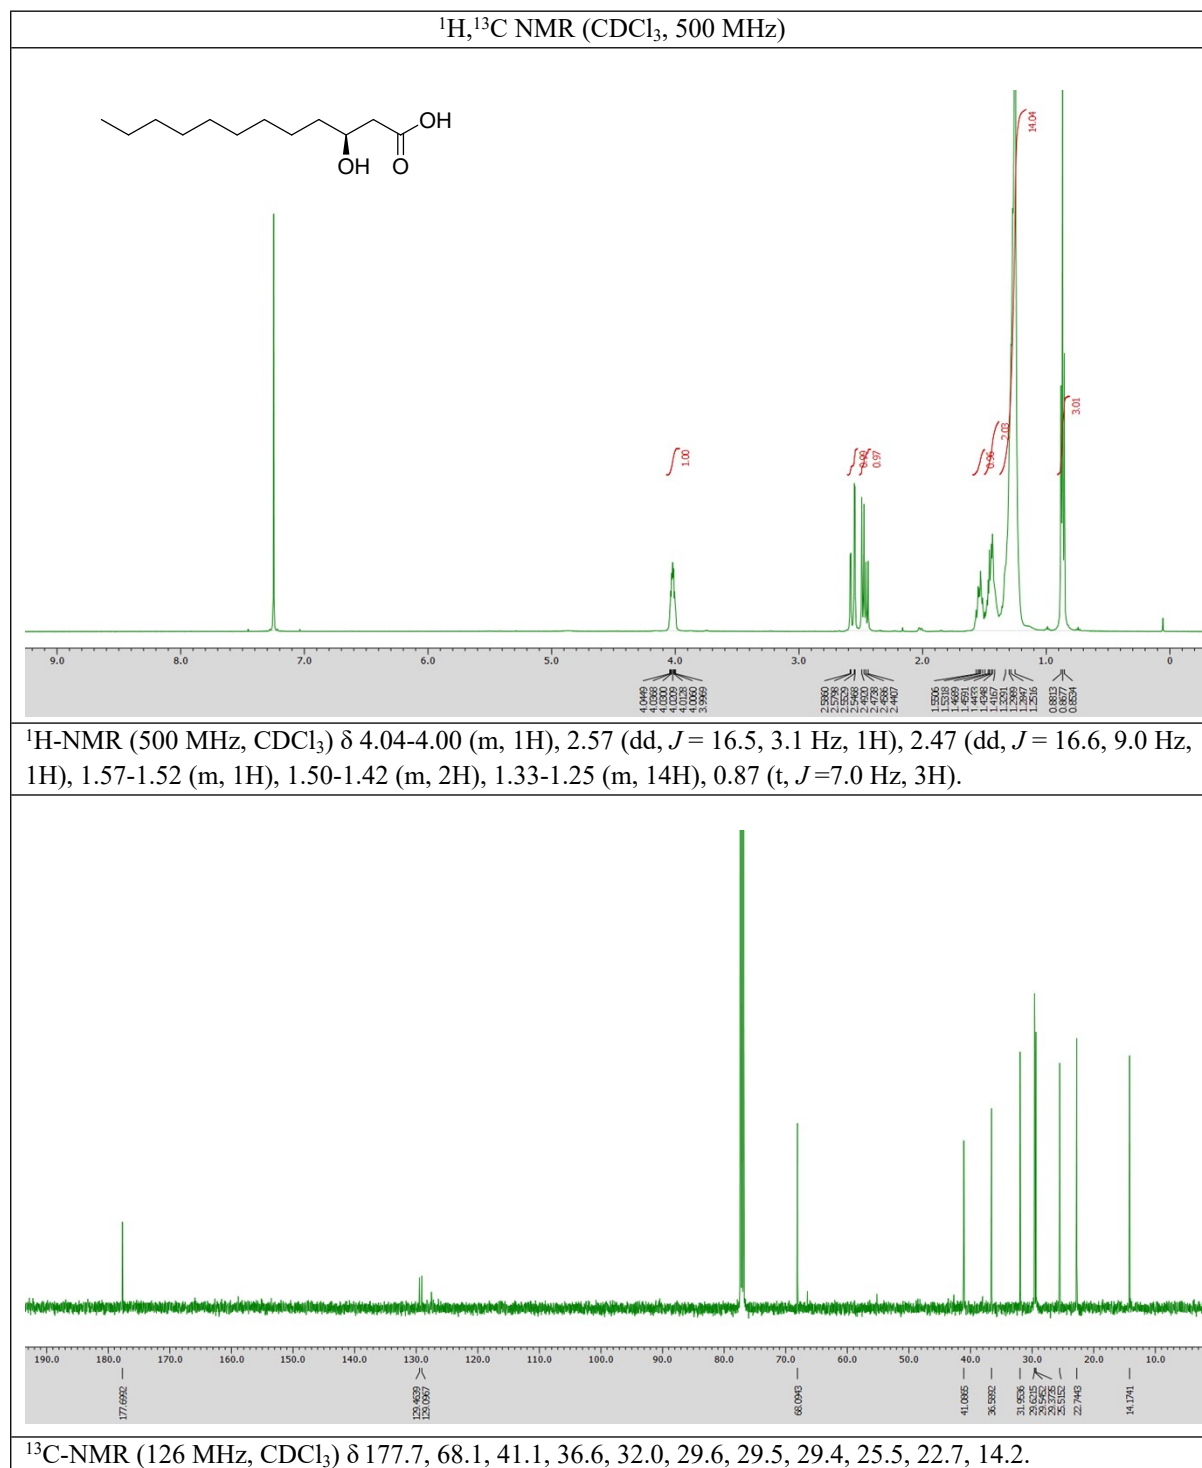

*(S)*-(*S*)-1-((*S*)-2-isopropyl-3-methoxy-5-oxo-2,5-dihydro-1*H*-pyrrol-1-yl)-3-methyl-1-oxobutan-2-yl 2-((*S*)-2-((*S*)-3-hydroxydodecanamido)-*N*,3-dimethylbutanamido)propanoate (**1c**)

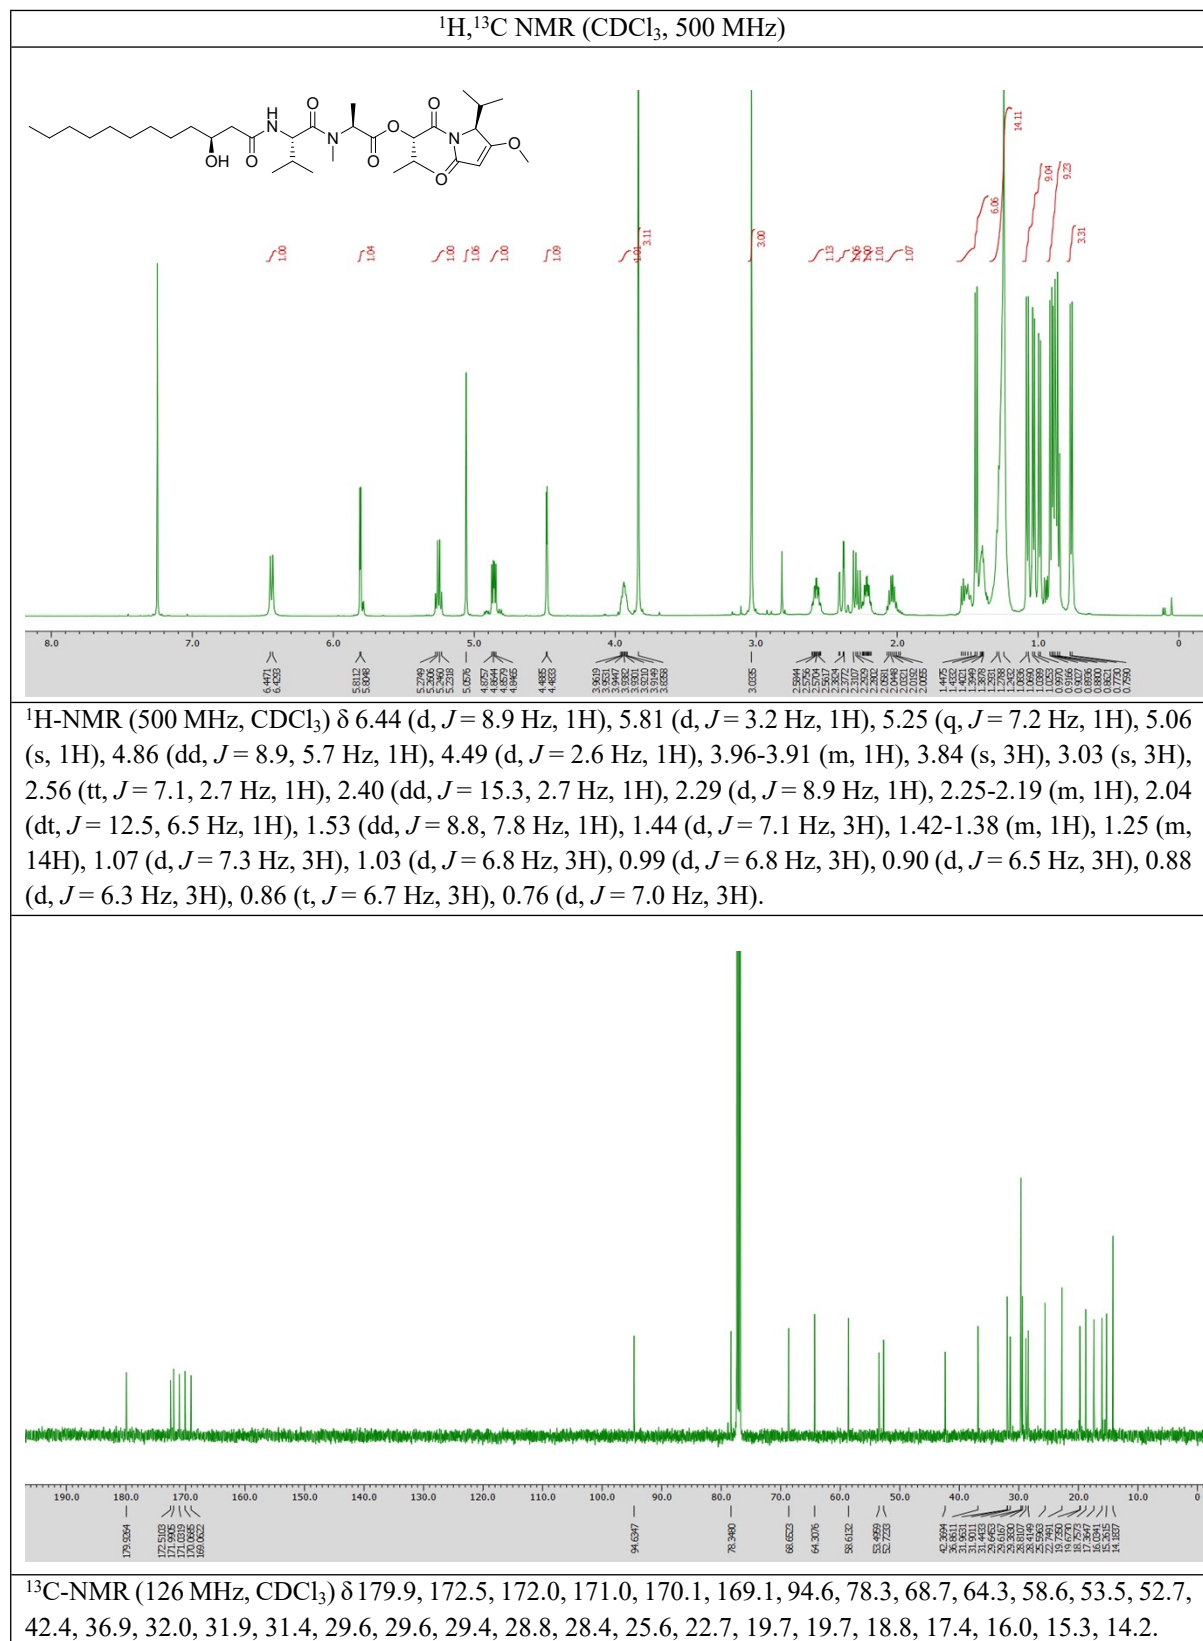

## VII. The copies of HRMS spectra

*(S)*-(*S*)-1-((*S*)-2-isopropyl-3-methoxy-5-oxo-2,5-dihydro-1*H*-pyrrol-1-yl)-3-methyl-1-oxobutan-2-yl 2-((*tert*-butoxycarbonyl)(methyl)amino)propanoate (**18**)

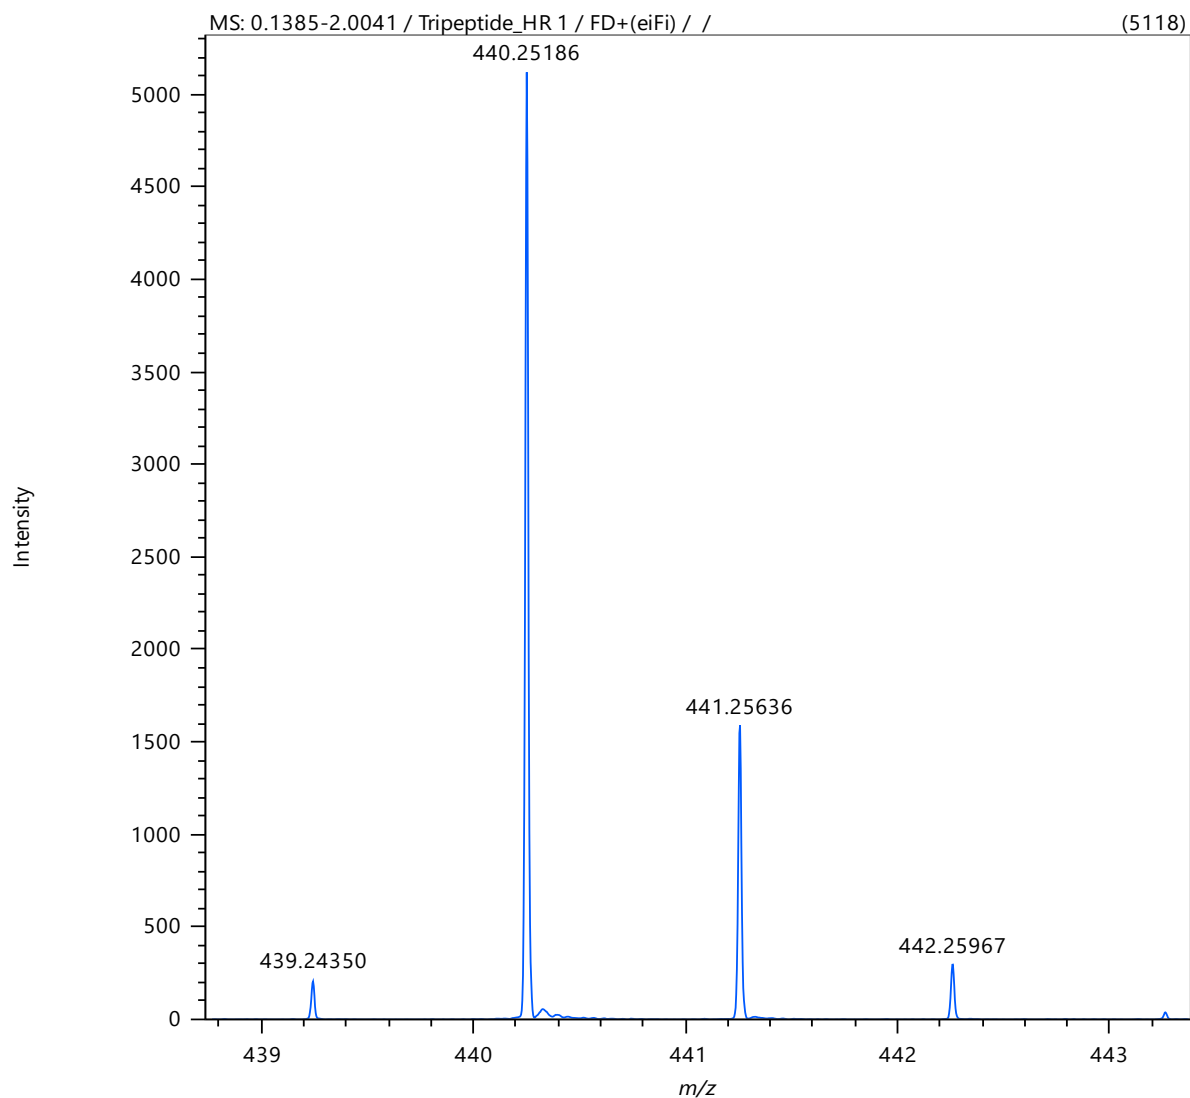

*(S)*-(*S*)-1-((*S*)-2-isopropyl-3-methoxy-5-oxo-2,5-dihydro-1*H*-pyrrol-1-yl)-3-methyl-1-oxobutan-2-yl 2-((*S*)-2-((*tert*-butoxycarbonyl)amino)-*N*,3-dimethylbutanamido)propanoate (**3**)

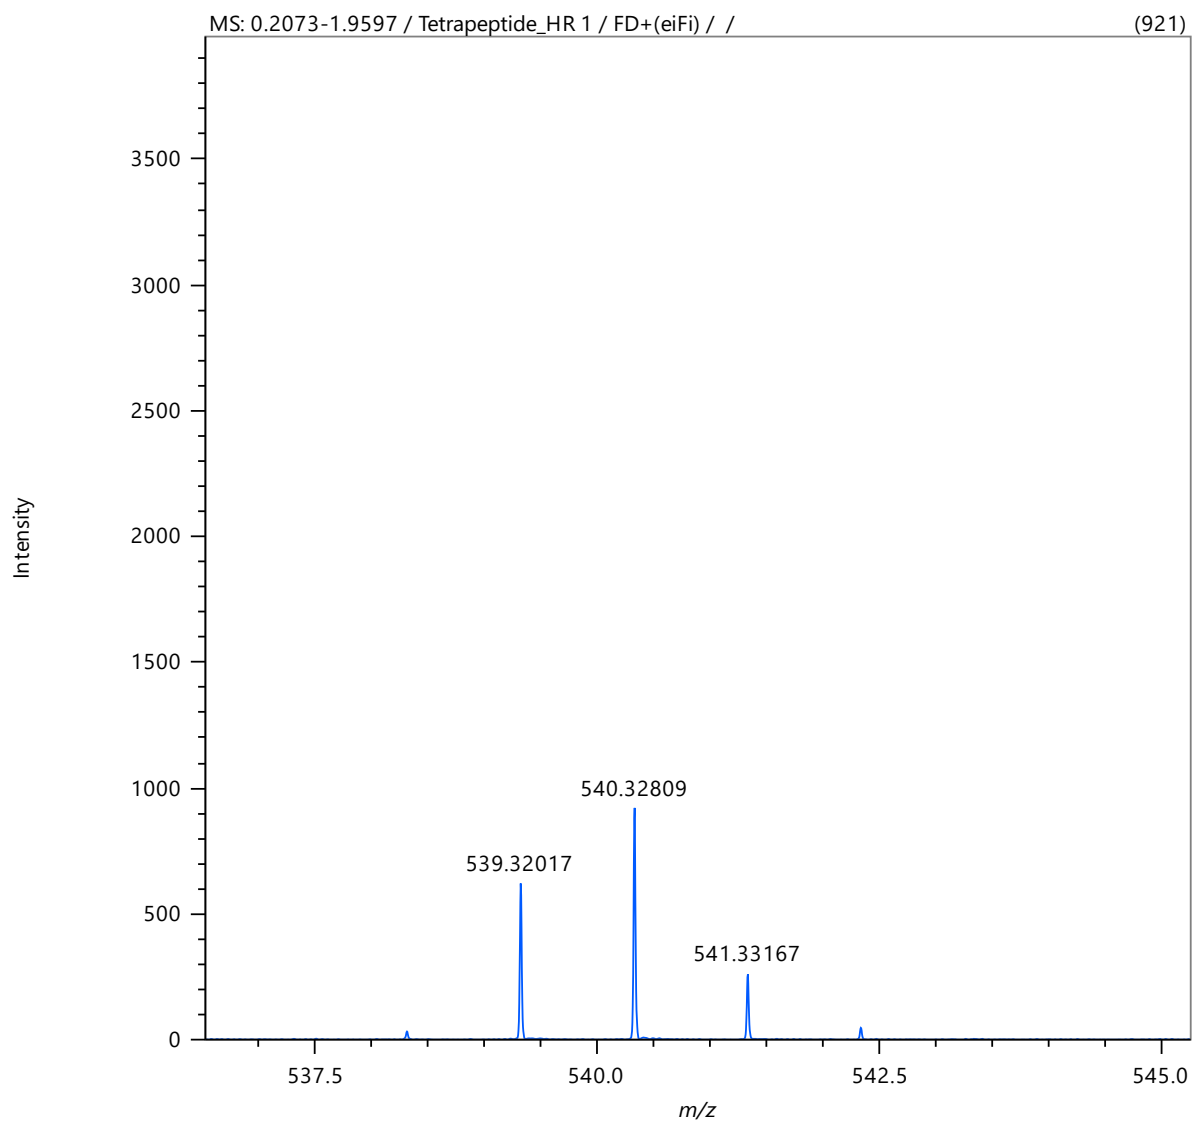

*(S)*-(*S*)-1-((*S*)-2-isopropyl-3-methoxy-5-oxo-2,5-dihydro-1*H*-pyrrol-1-yl)-3-methyl-1-oxobutan-2-yl 2-((*S*)-2-((*S*)-3-hydroxydecanamido)-*N*,3-dimethylbutanamido)propanoate (*1a*)

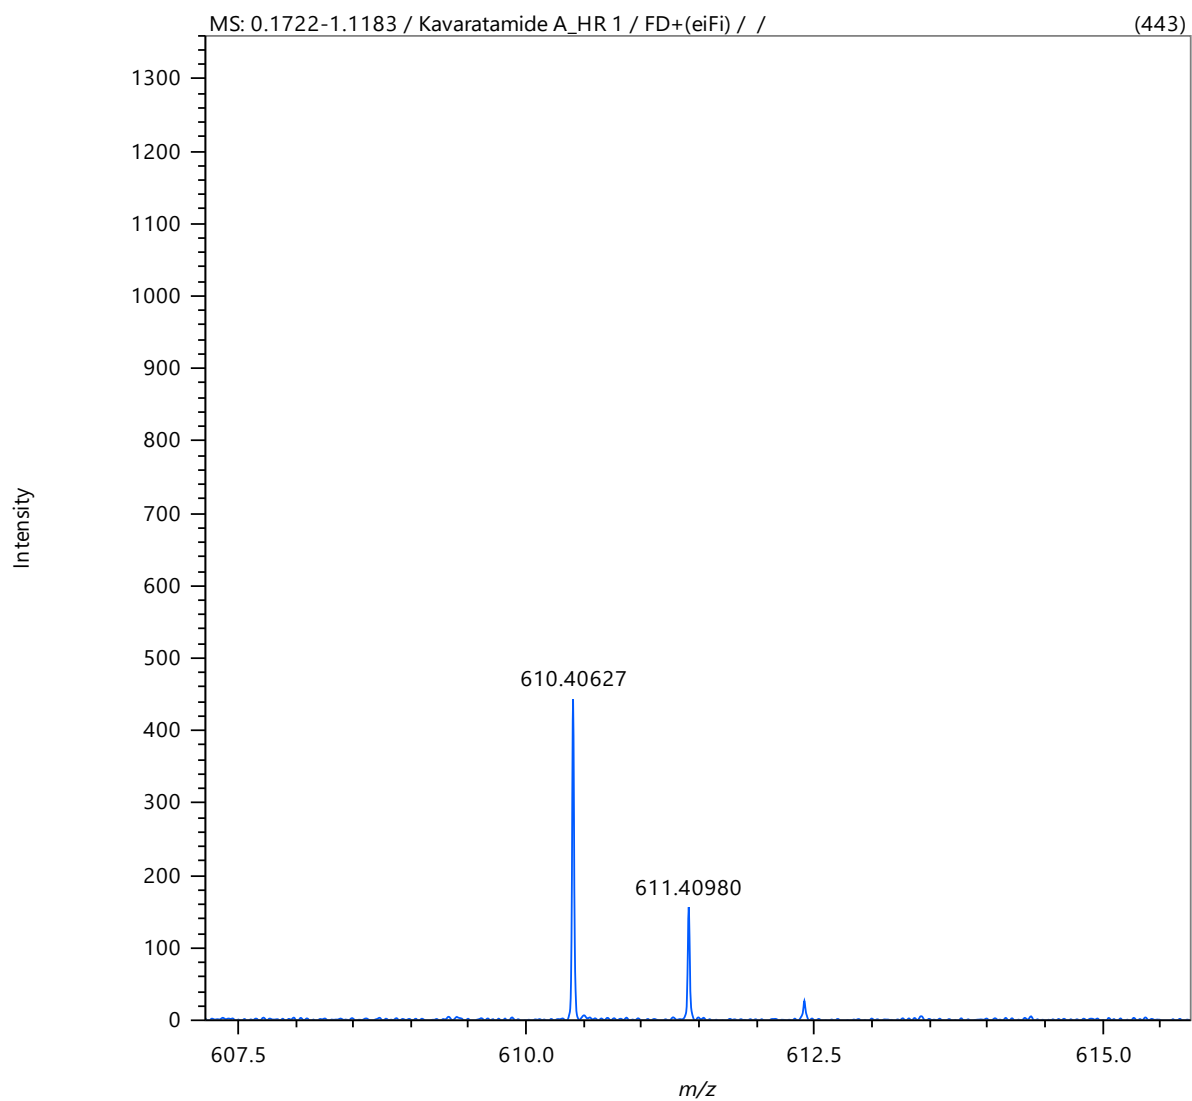

*(S)*-(*S*)-1-((*S*)-2-isopropyl-3-methoxy-5-oxo-2,5-dihydro-1*H*-pyrrol-1-yl)-3-methyl-1-oxobutan-2-yl 2-((*S*)-2-((*S*)-3-hydroxyoctanamido)-*N*,3-dimethylbutanamido)propanoate (**1b**)

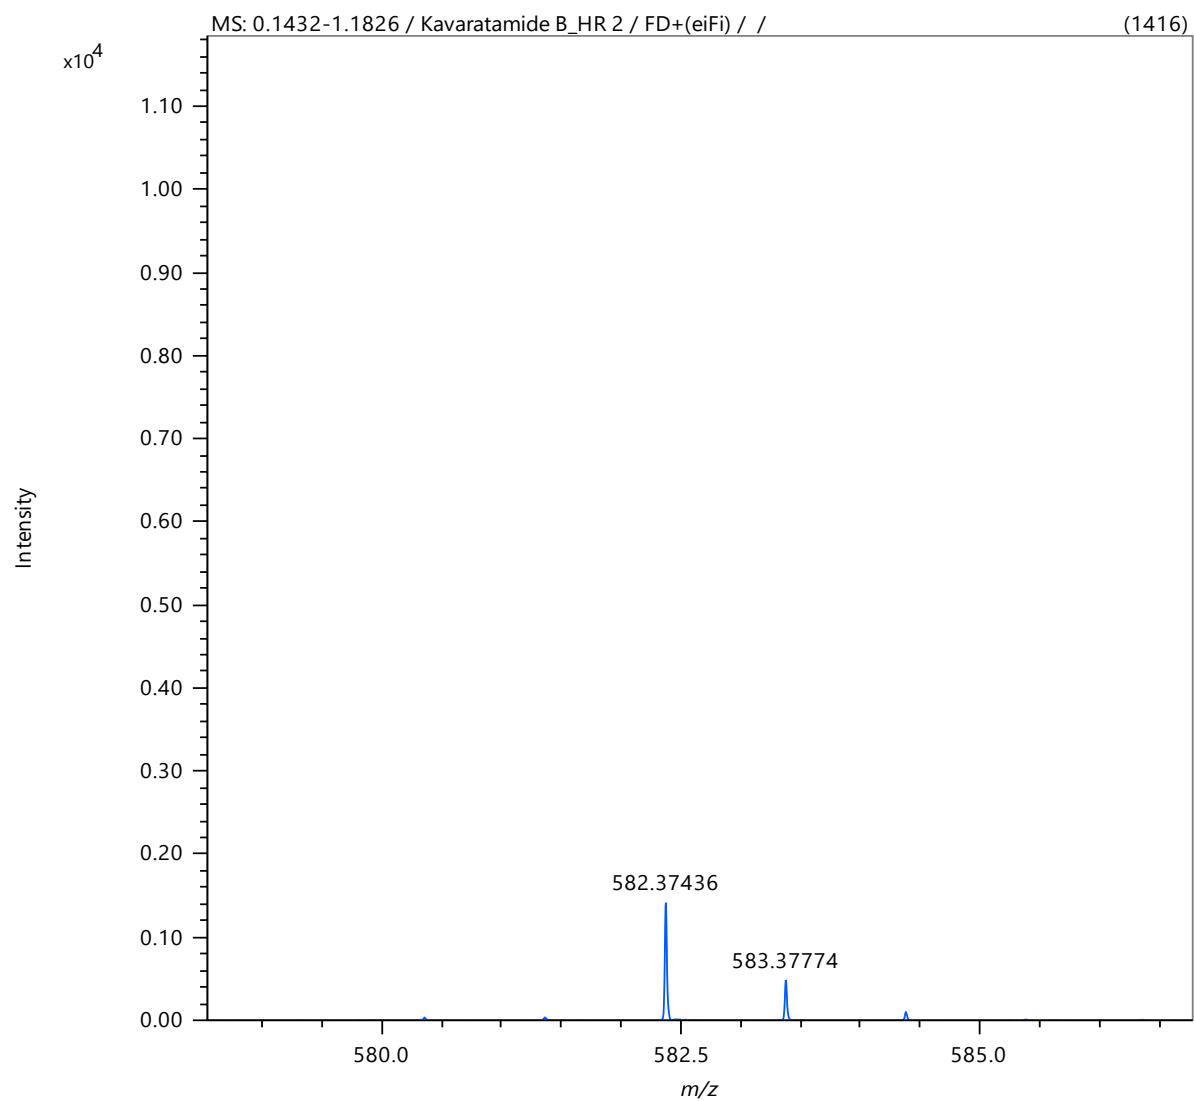

*(S)*-(*S*)-1-((*S*)-2-isopropyl-3-methoxy-5-oxo-2,5-dihydro-1*H*-pyrrol-1-yl)-3-methyl-1-oxobutan-2-yl 2-((*S*)-2-((*S*)-3-hydroxydodecanamido)-*N*,3-dimethylbutanamido)propanoate (**1c**)

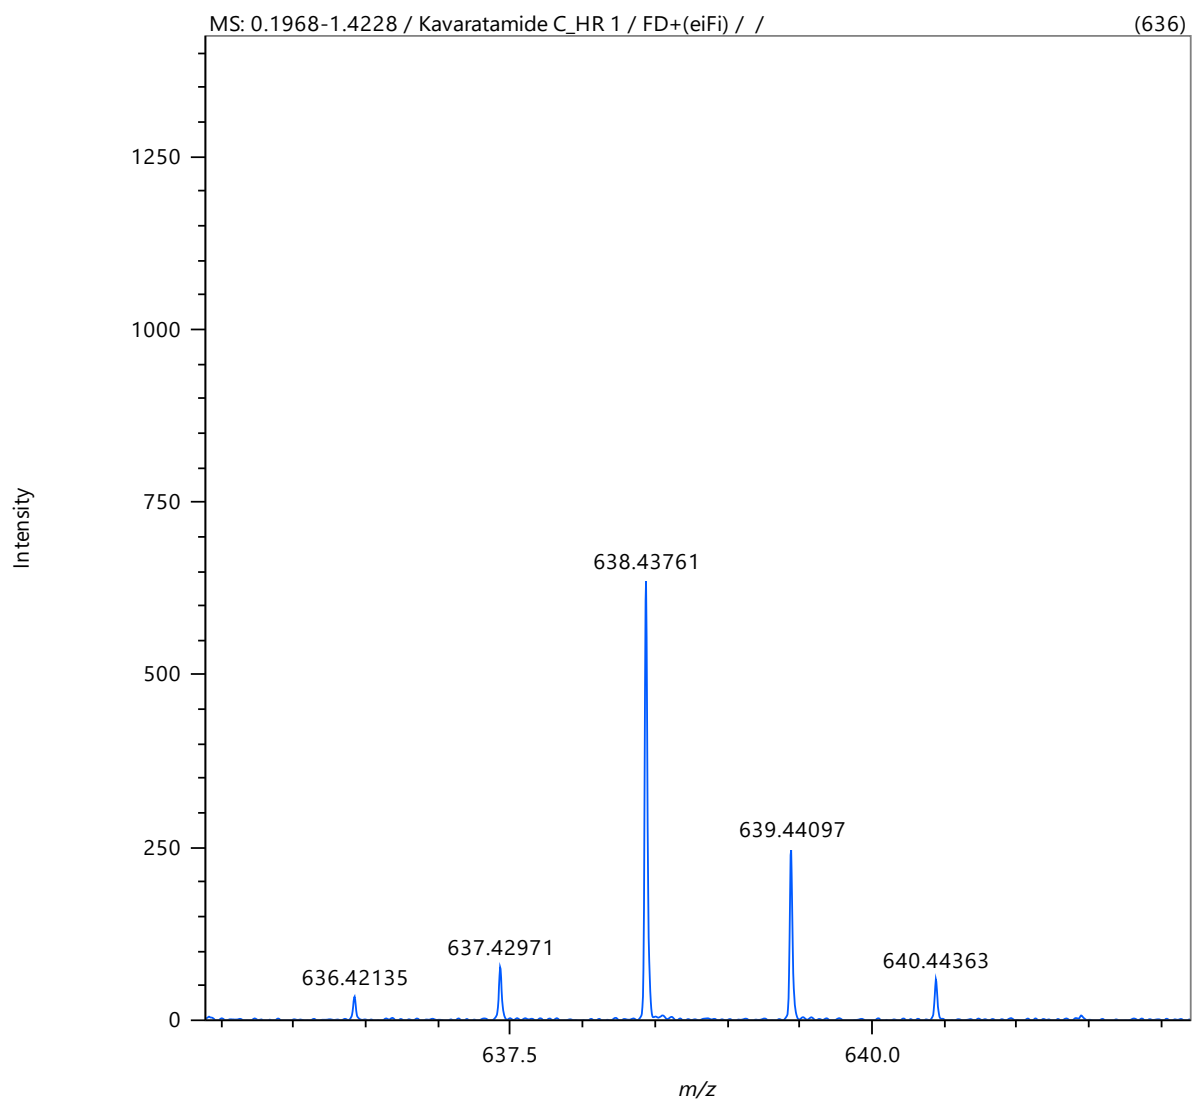



## IX. References

1. L. C. Dias, G. Z. Melgar and L. S. Jardim, *Tetrahedron letters*, 2005, **46**, 4427-4431.
2. T. Ren, K. Lv, F. Hu and Y. Chen, *Organic & Biomolecular Chemistry*, 2025, **23**, 1569-1573.
3. M. R. Sahu, S. R. Ingale and R. Kontham, *Organic & Biomolecular Chemistry*, 2025, **23**, 1819-1822.
4. D. Shklyaruck and E. Matushenkov, *Tetrahedron: Asymmetry*, 2011, **22**, 1448-1454.
5. I. Jaunzeme and A. Jirgensons, *Tetrahedron*, 2008, **64**, 5794-5799.
6. O. P. Horlacher, R. C. Hartkoorn, S. T. Cole and K.-H. Altmann, *ACS medicinal chemistry letters*, 2013, **4**, 264-268.
7. T. I. Berida and C. W. Lindsley, *ACS omega*, 2025.
8. M. Niello, D. Cintulova, E. Hellsberg, K. Jäntschi, M. Holy, L. H. Ayatollahi, N. V. Cozzi, M. Freissmuth, W. Sandtner and G. F. Ecker, *Neuropharmacology*, 2019, **161**, 107615.
9. B. Kitir, M. Baldry, H. Ingmer and C. A. Olsen, *Tetrahedron*, 2014, **70**, 7721-7732.
10. M. Nakahata, M. Imaida, H. Ozaki, T. Harada and A. Tai, *Bulletin of the Chemical Society of Japan*, 1982, **55**, 2186-2189.
